# Supplementary material for: Interventions for oropharyngeal dysphagia in acute and critical care: a systematic review and meta-analysis
Source: PubMed Central journal article supplement — Intensive Care Med. 2020 Jun 8;46(7):1326–38. doi: 10.1007/s00134-020-06126-y (PMC7334257; doi:10.1007/s00134-020-06126-y), 2020-06-08
Supplement: 134_2020_6126_MOESM1_ESM.pdf [file 134_2020_6126_MOESM1_ESM.pdf]

**Electronic Supplementary Material**

**Interventions for oropharyngeal dysphagia in acute and critical care: a systematic review and meta-analysis.**

## TABLE OF CONTENTS

|           |                                                                                            |              |
|-----------|--------------------------------------------------------------------------------------------|--------------|
| <b>1</b>  | <b>Appendix A: Electronic database searches and clinical trials registry searches.....</b> | <b>3-17</b>  |
| <b>2</b>  | <b>Appendix B: Data extraction form.....</b>                                               | <b>18-30</b> |
| <b>3</b>  | <b>Appendix C: Intervention description in included studies (TIDieR).....</b>              | <b>31-59</b> |
| <b>4</b>  | <b>Appendix D: Outcome reporting as per SPIRIT.....</b>                                    | <b>60-62</b> |
| <b>5</b>  | <b>Appendix E: Summary of characteristics of included studies.....</b>                     | <b>63-71</b> |
| <b>6</b>  | <b>Appendix F: Table of excluded studies.....</b>                                          | <b>72-79</b> |
| <b>7</b>  | <b>Appendix G: Table of unclassified and ongoing studies.....</b>                          | <b>80</b>    |
| <b>8</b>  | <b>Appendix H: Members of the expert advisory panel meeting June 2019.....</b>             | <b>81</b>    |
| <b>9</b>  | <b>Appendix I: Risk of bias within studies and judgement tables.....</b>                   | <b>82-96</b> |
| <b>10</b> | <b>Appendix J: Meta analyses of secondary outcomes.....</b>                                | <b>97-98</b> |

## Appendix A: Electronic database and clinical trial search strategies

Database(s): **Ovid MEDLINE(R) ALL** 1946 to 31 March 2020

Search Strategy:

| #  | Searches                                                                                                                                                                                                                                                                                                          |
|----|-------------------------------------------------------------------------------------------------------------------------------------------------------------------------------------------------------------------------------------------------------------------------------------------------------------------|
| 1  | INPATIENTS/                                                                                                                                                                                                                                                                                                       |
| 2  | "acute inpatient*".mp. [mp=title, abstract, original title, name of substance word, subject heading word, floating sub-heading word, keyword heading word, protocol supplementary concept word, rare disease supplementary concept word, unique identifier, synonyms]                                             |
| 3  | "acute hospital*".mp. [mp=title, abstract, original title, name of substance word, subject heading word, floating sub-heading word, keyword heading word, protocol supplementary concept word, rare disease supplementary concept word, unique identifier, synonyms]                                              |
| 4  | (tertiary adj5 (care* or setting* or inpatient* or hospital*)).mp. [mp=title, abstract, original title, name of substance word, subject heading word, floating sub-heading word, keyword heading word, protocol supplementary concept word, rare disease supplementary concept word, unique identifier, synonyms] |
| 5  | (acute adj5 (care* or setting* or hospital*)).mp. [mp=title, abstract, original title, name of substance word, subject heading word, floating sub-heading word, keyword heading word, protocol supplementary concept word, rare disease supplementary concept word, unique identifier, synonyms]                  |
| 6  | (acute or hyper?acute or sub?acute).mp. [mp=title, abstract, original title, name of substance word, subject heading word, floating sub-heading word, keyword heading word, protocol supplementary concept word, rare disease supplementary concept word, unique identifier, synonyms]                            |
| 7  | 1 or 2 or 3 or 4 or 5 or 6                                                                                                                                                                                                                                                                                        |
| 8  | intensive care units/ or burn units/ or coronary care units/ or recovery room/ or respiratory care units/                                                                                                                                                                                                         |
| 9  | critical care/ or early goal-directed therapy/                                                                                                                                                                                                                                                                    |
| 10 | "intensive care*".mp. [mp=title, abstract, original title, name of substance word, subject heading word, floating sub-heading word, keyword heading word, protocol supplementary concept word, rare disease supplementary concept word, unique identifier, synonyms]                                              |
| 11 | "critical care*".mp. [mp=title, abstract, original title, name of substance word, subject heading word, floating sub-heading word, keyword heading word, protocol                                                                                                                                                 |

|    |                                                                                                                                                                                                                                                                                                                                          |
|----|------------------------------------------------------------------------------------------------------------------------------------------------------------------------------------------------------------------------------------------------------------------------------------------------------------------------------------------|
|    | supplementary concept word, rare disease supplementary concept word, unique identifier, synonyms]                                                                                                                                                                                                                                        |
| 12 | ICU*.mp. [mp=title, abstract, original title, name of substance word, subject heading word, floating sub-heading word, keyword heading word, protocol supplementary concept word, rare disease supplementary concept word, unique identifier, synonyms]                                                                                  |
| 13 | Critical Illness/                                                                                                                                                                                                                                                                                                                        |
| 14 | "critical* ill*".mp. [mp=title, abstract, original title, name of substance word, subject heading word, floating sub-heading word, keyword heading word, protocol supplementary concept word, rare disease supplementary concept word, unique identifier, synonyms]                                                                      |
| 15 | ("critical illness polyneuropath*" or CIP or CIPN or "critical illness polymyopath*").mp. [mp=title, abstract, original title, name of substance word, subject heading word, floating sub-heading word, keyword heading word, protocol supplementary concept word, rare disease supplementary concept word, unique identifier, synonyms] |
| 16 | ((ICU* or "intensive care*") adj5 (musc* adj5 weak*)).mp. [mp=title, abstract, original title, name of substance word, subject heading word, floating sub-heading word, keyword heading word, protocol supplementary concept word, rare disease supplementary concept word, unique identifier, synonyms]                                 |
| 17 | 8 or 9 or 10 or 11 or 12 or 13 or 14 or 15 or 16                                                                                                                                                                                                                                                                                         |
| 18 | 7 or 17                                                                                                                                                                                                                                                                                                                                  |
| 19 | (swallow* adj5 (exercise* or therap* or rehab* or train*)).mp. [mp=title, abstract, original title, name of substance word, subject heading word, floating sub-heading word, keyword heading word, protocol supplementary concept word, rare disease supplementary concept word, unique identifier, synonyms]                            |
| 20 | "swallow strengthening*".mp.                                                                                                                                                                                                                                                                                                             |
| 21 | (swallow* adj5 man?euv*).mp. [mp=title, abstract, original title, name of substance word, subject heading word, floating sub-heading word, keyword heading word, protocol supplementary concept word, rare disease supplementary concept word, unique identifier, synonyms]                                                              |
| 22 | ("thermal tactile stimulation*" or TTS).mp. [mp=title, abstract, original title, name of substance word, subject heading word, floating sub-heading word, keyword heading word, protocol supplementary concept word, rare disease supplementary concept word, unique identifier, synonyms]                                               |
| 23 | (diet* adj5 modif*).mp. [mp=title, abstract, original title, name of substance word, subject heading word, floating sub-heading word, keyword heading word, protocol supplementary concept word, rare disease supplementary concept word, unique identifier, synonyms]                                                                   |

|    |                                                                                                                                                                                                                                                                                                                        |
|----|------------------------------------------------------------------------------------------------------------------------------------------------------------------------------------------------------------------------------------------------------------------------------------------------------------------------|
| 24 | ((fluid* or bolus* or boli) adj5 (viscos* or thick* or rheology*)).mp. [mp=title, abstract, original title, name of substance word, subject heading word, floating sub-heading word, keyword heading word, protocol supplementary concept word, rare disease supplementary concept word, unique identifier, synonyms]  |
| 25 | (head?lift* or shaker* or CTAR* or "chin tuck against resistance*").mp. [mp=title, abstract, original title, name of substance word, subject heading word, floating sub-heading word, keyword heading word, protocol supplementary concept word, rare disease supplementary concept word, unique identifier, synonyms] |
| 26 | electric stimulation therapy/ or transcutaneous electric nerve stimulation/                                                                                                                                                                                                                                            |
| 27 | Electric Stimulation/                                                                                                                                                                                                                                                                                                  |
| 28 | "neuro?muscular electric* stimulation* ".mp. [mp=title, abstract, original title, name of substance word, subject heading word, floating sub-heading word, keyword heading word, protocol supplementary concept word, rare disease supplementary concept word, unique identifier, synonyms]                            |
| 29 | vitalstim*.mp. [mp=title, abstract, original title, name of substance word, subject heading word, floating sub-heading word, keyword heading word, protocol supplementary concept word, rare disease supplementary concept word, unique identifier, synonyms]                                                          |
| 30 | "pharyn* electric* stimulation* ".mp. [mp=title, abstract, original title, name of substance word, subject heading word, floating sub-heading word, keyword heading word, protocol supplementary concept word, rare disease supplementary concept word, unique identifier, synonyms]                                   |
| 31 | ((expiratory or respiratory) adj5 "muscle strength*").mp. [mp=title, abstract, original title, name of substance word, subject heading word, floating sub-heading word, keyword heading word, protocol supplementary concept word, rare disease supplementary concept word, unique identifier, synonyms]               |
| 32 | EMST*.mp. [mp=title, abstract, original title, name of substance word, subject heading word, floating sub-heading word, keyword heading word, protocol supplementary concept word, rare disease supplementary concept word, unique identifier, synonyms]                                                               |
| 33 | ((("oral pressure*" or tongue*) adj5 (strengthen* or exercis*)).mp. [mp=title, abstract, original title, name of substance word, subject heading word, floating sub-heading word, keyword heading word, protocol supplementary concept word, rare disease supplementary concept word, unique identifier, synonyms]     |
| 34 | ("iowa oral performance instrument*" or IOPI*).mp. [mp=title, abstract, original title, name of substance word, subject heading word, floating sub-heading word, keyword heading word, protocol supplementary concept word, rare disease supplementary concept word, unique identifier, synonyms]                      |

|    |                                                                                                                                                                                                                                                                                                              |
|----|--------------------------------------------------------------------------------------------------------------------------------------------------------------------------------------------------------------------------------------------------------------------------------------------------------------|
| 35 | ELECTROMYOGRAPHY/                                                                                                                                                                                                                                                                                            |
| 36 | "surface electromyograph*".mp. [mp=title, abstract, original title, name of substance word, subject heading word, floating sub-heading word, keyword heading word, protocol supplementary concept word, rare disease supplementary concept word, unique identifier, synonyms]                                |
| 37 | biofeedback*.mp. [mp=title, abstract, original title, name of substance word, subject heading word, floating sub-heading word, keyword heading word, protocol supplementary concept word, rare disease supplementary concept word, unique identifier, synonyms]                                              |
| 38 | "surface EMG*".mp. [mp=title, abstract, original title, name of substance word, subject heading word, floating sub-heading word, keyword heading word, protocol supplementary concept word, rare disease supplementary concept word, unique identifier, synonyms]                                            |
| 39 | (intervention* or treatment* or therap* or rehab*).mp. [mp=title, abstract, original title, name of substance word, subject heading word, floating sub-heading word, keyword heading word, protocol supplementary concept word, rare disease supplementary concept word, unique identifier, synonyms]        |
| 40 | 19 or 20 or 21 or 22 or 23 or 24 or 25 or 26 or 27 or 28 or 29 or 30 or 31 or 32 or 33 or 34 or 35 or 36 or 37 or 38 or 39                                                                                                                                                                                   |
| 41 | Deglutition Disorders/                                                                                                                                                                                                                                                                                       |
| 42 | (swallow* adj5 (disorder* or dysfunction* or difficult*)).mp. [mp=title, abstract, original title, name of substance word, subject heading word, floating sub-heading word, keyword heading word, protocol supplementary concept word, rare disease supplementary concept word, unique identifier, synonyms] |
| 43 | dysphagi*.mp. [mp=title, abstract, original title, name of substance word, subject heading word, floating sub-heading word, keyword heading word, protocol supplementary concept word, rare disease supplementary concept word, unique identifier, synonyms]                                                 |
| 44 | "oro?pharyngeal swallowing*".mp. [mp=title, abstract, original title, name of substance word, subject heading word, floating sub-heading word, keyword heading word, protocol supplementary concept word, rare disease supplementary concept word, unique identifier, synonyms]                              |
| 45 | "oral and pharyngeal swallowing*".mp. [mp=title, abstract, original title, name of substance word, subject heading word, floating sub-heading word, keyword heading word, protocol supplementary concept word, rare disease supplementary concept word, unique identifier, synonyms]                         |

|    |                                                                                                                                                                                                                                                                                                                     |
|----|---------------------------------------------------------------------------------------------------------------------------------------------------------------------------------------------------------------------------------------------------------------------------------------------------------------------|
| 46 | (aspir* adj5 (pneumonia* or food* or feed* or fluid* or silent)).mp. [mp=title, abstract, original title, name of substance word, subject heading word, floating sub-heading word, keyword heading word, protocol supplementary concept word, rare disease supplementary concept word, unique identifier, synonyms] |
| 47 | Pneumonia, Aspiration/                                                                                                                                                                                                                                                                                              |
| 48 | 41 or 42 or 43 or 44 or 45 or 46 or 47                                                                                                                                                                                                                                                                              |
| 49 | Randomized Controlled Trials as Topic/                                                                                                                                                                                                                                                                              |
| 50 | Randomized Controlled Trial/                                                                                                                                                                                                                                                                                        |
| 51 | Random Allocation/                                                                                                                                                                                                                                                                                                  |
| 52 | Double-Blind Method/                                                                                                                                                                                                                                                                                                |
| 53 | Single-Blind Method/                                                                                                                                                                                                                                                                                                |
| 54 | Clinical Trial/                                                                                                                                                                                                                                                                                                     |
| 55 | clinical trial, phase i.pt.                                                                                                                                                                                                                                                                                         |
| 56 | clinical trial, phase ii.pt.                                                                                                                                                                                                                                                                                        |
| 57 | clinical trial, phase iii.pt.                                                                                                                                                                                                                                                                                       |
| 58 | clinical trial, phase iv.pt.                                                                                                                                                                                                                                                                                        |
| 59 | controlled clinical trial.pt.                                                                                                                                                                                                                                                                                       |
| 60 | randomized controlled trial.pt.                                                                                                                                                                                                                                                                                     |
| 61 | multicenter study.pt.                                                                                                                                                                                                                                                                                               |
| 62 | exp Clinical Trials as Topic/                                                                                                                                                                                                                                                                                       |
| 63 | 49 or 50 or 51 or 52 or 53 or 54 or 55 or 56 or 57 or 58 or 59 or 60 or 61 or 62                                                                                                                                                                                                                                    |
| 64 | (clinical adj trial*).tw.                                                                                                                                                                                                                                                                                           |
| 65 | ((singl* or doubl* or trebl* or tripl*) adj (blind* or mask*)).tw.                                                                                                                                                                                                                                                  |
| 66 | PLACEBOS/                                                                                                                                                                                                                                                                                                           |
| 67 | placebo*.tw.                                                                                                                                                                                                                                                                                                        |
| 68 | randomly allocated.tw.                                                                                                                                                                                                                                                                                              |
| 69 | (allocated adj2 random*).tw.                                                                                                                                                                                                                                                                                        |
| 70 | (quasi?experiment* or quasi?random* or quasi?control*).tw.                                                                                                                                                                                                                                                          |
| 71 | 64 or 65 or 66 or 67 or 68 or 69 or 70                                                                                                                                                                                                                                                                              |
| 72 | 63 or 71                                                                                                                                                                                                                                                                                                            |
| 73 | case report.tw.                                                                                                                                                                                                                                                                                                     |
| 74 | LETTER/                                                                                                                                                                                                                                                                                                             |
| 75 | Historical Article/                                                                                                                                                                                                                                                                                                 |
| 76 | 73 or 74 or 75                                                                                                                                                                                                                                                                                                      |

|    |                                         |
|----|-----------------------------------------|
| 77 | 72 not 76                               |
| 78 | 18 and 40 and 48 and 77                 |
| 79 | limit 78 to "all adult (19 plus years)" |

## Cochrane Library (CENTRAL)

#1 MeSH descriptor: [Inpatients] this term only 901

#2 (acute or hyper\*acute or sub\*acute or tertiary) NEAR/5 (inpatient\* or hospital\* or care\* or setting\*) 20948

#3 MeSH descriptor: [Critical Care] this term only 1680

#4 MeSH descriptor: [Intensive Care Units] this term only 2210

#5 "intensive care\*" or ICU\* 35185

#6 MeSH descriptor: [Critical Illness] this term only 1985

#7 "critical\* ill\*" or "critical care\*" or CIP or SIPN 19974

#8 swallow\* NEAR/5 (exercise\* or therap\* or rehab\* or train\* or strengthening\* or man\*euv\*) 570

#9 "thermal tactile stimulation\*" or TTS 693

#10 diet\* NEAR/5 modif\* 3171

#11 (fluid\* or bolus\* or boli) NEAR/5 (viscos\* or thick\* or rheology\*) 317

#12 head\*lift\* or shaker\* or CTAR\* or "chin tuck against resistance\*" 422

#13 MeSH descriptor: [Electric Stimulation Therapy] this term only 1811

#14 MeSH descriptor: [Transcutaneous Electric Nerve Stimulation] this term only 1057

#15 MeSH descriptor: [Electric Stimulation] this term only 1776

#16 "electric\* stimulation\*" 3935

#17 vitalstim\* 23

#18 (expiratory or respiratory) NEAR/5 "muscle strength\*" 872

#19 EMST\* 60

#20 ("oral pressure\*" or tongue\*) NEAR/5 (strengthen\* or exercis\*) 81

#21 "iowa oral performance instrument\*" or IOPI\* 72

#22 MeSH descriptor: [Electromyography] this term only 3353

#23 "surface electromyograph\*" 8

#24 biofeedback\* 3318

#25 "surface EMG\*" 364

#26 intervention\* or treatment\* or therap\* or rehab\* 1137038

#27 MeSH descriptor: [Deglutition Disorders] this term only 772

#28 swallow\* NEAR/5 (dysfunction\* or disorder\* or difficult\*) 1012

#29 dysphagi\* 4305

#30 "oro\*pharyngeal swallowing\*" 2

#31 "oral and pharyngeal swallowing\*" 1

#32 aspir\* NEAR/5 (pneumonia\* or food\* or feed\* or fluid\* or silent) 1855

#33 MeSH descriptor: [Pneumonia, Aspiration] this term only 321

#34 #1 or #2 21725

#35 #3 or #4 or #5 or #6 or #7 48399

#36 #33 or #34 22024



#37 #8 or #9 or #10 or #11 or #12 or #13 or #14 or #15 or #16 or #17 or #18 or #19 or #20 or #21 or #22 or #23 or #24 or #25 or #26 1140882  
 #38 #27 or #28 or #29 or #30 or #31 or #32 or #33 6589  
 #39 #36 and #37 and #38 in Trials 350.

## EMBASE

| #  | Searches                                                                                                                                                                                                                                                  |
|----|-----------------------------------------------------------------------------------------------------------------------------------------------------------------------------------------------------------------------------------------------------------|
| 1  | hospital patient/ or aged hospital patient/                                                                                                                                                                                                               |
| 2  | "acute inpatient*".mp. [mp=title, abstract, heading word, drug trade name, original title, device manufacturer, drug manufacturer, device trade name, keyword, floating subheading word, candidate term word]                                             |
| 3  | "acute hospital*".mp. [mp=title, abstract, heading word, drug trade name, original title, device manufacturer, drug manufacturer, device trade name, keyword, floating subheading word, candidate term word]                                              |
| 4  | (tertiary adj5 (care* or setting* or inpatient* or hospital*)).mp. [mp=title, abstract, heading word, drug trade name, original title, device manufacturer, drug manufacturer, device trade name, keyword, floating subheading word, candidate term word] |
| 5  | (acute adj5 (care* or setting* or hospital*)).mp. [mp=title, abstract, heading word, drug trade name, original title, device manufacturer, drug manufacturer, device trade name, keyword, floating subheading word, candidate term word]                  |
| 6  | (acute or hyper?acute or sub?acute).mp. [mp=title, abstract, heading word, drug trade name, original title, device manufacturer, drug manufacturer, device trade name, keyword, floating subheading word, candidate term word]                            |
| 7  | 1 or 2 or 3 or 4 or 5 or 6                                                                                                                                                                                                                                |
| 8  | intensive care unit/ or burn unit/ or coronary care unit/ or medical intensive care unit/ or neurological intensive care unit/ or psychiatric intensive care unit/ or stroke unit/ or surgical intensive care unit/                                       |
| 9  | recovery room/                                                                                                                                                                                                                                            |
| 10 | "respiratory care unit*".mp. [mp=title, abstract, heading word, drug trade name, original title, device manufacturer, drug manufacturer, device trade name, keyword, floating subheading word, candidate term word]                                       |
| 11 | intensive care/                                                                                                                                                                                                                                           |
| 12 | "critical care*".mp. [mp=title, abstract, heading word, drug trade name, original title, device manufacturer, drug manufacturer, device trade name, keyword, floating subheading word, candidate term word]                                               |
| 13 | early goal-directed therapy/                                                                                                                                                                                                                              |
| 14 | ICU*.mp. [mp=title, abstract, heading word, drug trade name, original title, device manufacturer, drug manufacturer, device trade name, keyword, floating subheading word, candidate term word]                                                           |

|    |                                                                                                                                                                                                                           |
|----|---------------------------------------------------------------------------------------------------------------------------------------------------------------------------------------------------------------------------|
| 15 | critical illness/                                                                                                                                                                                                         |
| 16 | "critical* ill*".mp. [mp=title, abstract, heading word, drug trade name, original title, device manufacturer, drug manufacturer, device trade name, keyword, floating subheading word, candidate term word]               |
| 17 | ("critical illness polyneuropath*" or CIP or CIPN or "critical illness polymyopath*").mp.                                                                                                                                 |
| 18 | ((ICU* or "intensive care*") adj5 (musc* adj5 weak*)).mp.                                                                                                                                                                 |
| 19 | 8 or 9 or 10 or 11 or 12 or 13 or 14 or 15 or 16 or 17 or 18                                                                                                                                                              |
| 20 | 7 or 19                                                                                                                                                                                                                   |
| 21 | (swallow* adj5 (exercise* or therap* or rehab* or train*)).mp.                                                                                                                                                            |
| 22 | "swallow strengthening*".mp.                                                                                                                                                                                              |
| 23 | (swallow* adj5 man?euv*).mp.                                                                                                                                                                                              |
| 24 | ("thermal tactile stimulation*" or TTS).mp.                                                                                                                                                                               |
| 25 | (diet* adj5 modif*).mp.                                                                                                                                                                                                   |
| 26 | ((fluid* or bolus* or boli) adj5 (viscos* or thick* or rheology*)).mp.                                                                                                                                                    |
| 27 | (head?lift* or shaker* or CTAR* or "chin tuck against resistance*").mp.                                                                                                                                                   |
| 28 | electrotherapy/                                                                                                                                                                                                           |
| 29 | "electric stimulation therap*".mp. [mp=title, abstract, heading word, drug trade name, original title, device manufacturer, drug manufacturer, device trade name, keyword, floating subheading word, candidate term word] |
| 30 | transcutaneous electrical nerve stimulation/                                                                                                                                                                              |
| 31 | neuromuscular electrical stimulation/                                                                                                                                                                                     |
| 32 | vitalstim*.mp. [mp=title, abstract, heading word, drug trade name, original title, device manufacturer, drug manufacturer, device trade name, keyword, floating subheading word, candidate term word]                     |
| 33 | "pharyn* electric* stimulation*".mp.                                                                                                                                                                                      |
| 34 | ((expiratory or respiratory) adj5 "muscle strength*").mp.                                                                                                                                                                 |
| 35 | emst*.mp. [mp=title, abstract, heading word, drug trade name, original title, device manufacturer, drug manufacturer, device trade name, keyword, floating subheading word, candidate term word]                          |
| 36 | ((oral pressure*" or tongue*) adj5 (strengthen* or exercis*)).mp.                                                                                                                                                         |
| 37 | ("iowa oral performance instrument*" or IOPI*).mp.                                                                                                                                                                        |
| 38 | electromyography/                                                                                                                                                                                                         |
| 39 | "surface electromyograph*".mp.                                                                                                                                                                                            |
| 40 | biofeedback/                                                                                                                                                                                                              |
| 41 | "surface EMG*".mp.                                                                                                                                                                                                        |
| 42 | (intervention* or treatment* or therap* or rehab*).mp.                                                                                                                                                                    |
| 43 | 21 or 22 or 23 or 24 or 25 or 26 or 27 or 28 or 29 or 30 or 31 or 32 or 33 or 34 or 35 or 36 or 37 or 38 or 39 or 40 or 41 or 42                                                                                          |

|    |                                                                                                                                                                                                                 |
|----|-----------------------------------------------------------------------------------------------------------------------------------------------------------------------------------------------------------------|
| 44 | dysphagia/                                                                                                                                                                                                      |
| 45 | ((deglutition* or swallow*) adj5 (disorder* or dysfunction* or difficult*)).mp.                                                                                                                                 |
| 46 | "oro?pharyngeal swallowing*".mp.                                                                                                                                                                                |
| 47 | "oral and pharyngeal swallowing*".mp.                                                                                                                                                                           |
| 48 | pulmonary aspiration/ or aspiration pneumonia/ or food aspiration/ or liquid aspiration/                                                                                                                        |
| 49 | (aspir* adj5 silent).mp. [mp=title, abstract, heading word, drug trade name, original title, device manufacturer, drug manufacturer, device trade name, keyword, floating subheading word, candidate term word] |
| 50 | 44 or 45 or 46 or 47 or 48 or 49                                                                                                                                                                                |
| 51 | Clinical Trial/                                                                                                                                                                                                 |
| 52 | Randomized Controlled Trial/                                                                                                                                                                                    |
| 53 | controlled clinical trial/                                                                                                                                                                                      |
| 54 | multicenter study/                                                                                                                                                                                              |
| 55 | Phase 3 clinical trial/                                                                                                                                                                                         |
| 56 | Phase 4 clinical trial/                                                                                                                                                                                         |
| 57 | exp RANDOMIZATION/                                                                                                                                                                                              |
| 58 | Single Blind Procedure/                                                                                                                                                                                         |
| 59 | Double Blind Procedure/                                                                                                                                                                                         |
| 60 | Crossover Procedure/                                                                                                                                                                                            |
| 61 | placebo/                                                                                                                                                                                                        |
| 62 | randomi?ed controlled trial\$.tw.                                                                                                                                                                               |
| 63 | rct.tw.                                                                                                                                                                                                         |
| 64 | (random\$ adj2 allocat\$).tw.                                                                                                                                                                                   |
| 65 | single blind\$.tw.                                                                                                                                                                                              |
| 66 | double blind\$.tw.                                                                                                                                                                                              |
| 67 | ((treble or triple) adj blind\$).tw.                                                                                                                                                                            |
| 68 | placebo\$.tw.                                                                                                                                                                                                   |
| 69 | Prospective Study/                                                                                                                                                                                              |
| 70 | quasi experimental study/                                                                                                                                                                                       |
| 71 | (quasi?experiment* or quasi?random* or quasi?control*).tw.                                                                                                                                                      |
| 72 | 51 or 52 or 53 or 54 or 55 or 56 or 57 or 58 or 59 or 60 or 61 or 62 or 63 or 64 or 65 or 66 or 67 or 68 or 69 or 70 or 71                                                                                      |
| 73 | Case Study/                                                                                                                                                                                                     |
| 74 | case report.tw.                                                                                                                                                                                                 |

|    |                                                          |
|----|----------------------------------------------------------|
| 75 | abstract report/ or letter/                              |
| 76 | Conference proceeding.pt.                                |
| 77 | Conference abstract.pt.                                  |
| 78 | Editorial.pt.                                            |
| 79 | Letter.pt.                                               |
| 80 | Note.pt.                                                 |
| 81 | 73 or 74 or 75 or 76 or 77 or 78 or 79 or 80             |
| 82 | 72 not 81                                                |
| 83 | 20 and 43 and 50 and 82                                  |
| 84 | limit 83 to (adult <18 to 64 years> or aged <65+ years>) |

---

## CINAHL

- S71 S67 AND S68 AND S69 AND S70
- S70 S65 OR S66
- S69 S49 OR S50 OR S51 OR S52 OR S53  
OR S54 OR S55 OR S56 OR S57 OR  
S58 OR S59 OR S60 OR S61 OR S62  
OR S63 OR S64
- S68 S41 OR S42 OR S43 OR S44 OR S45  
OR S46 OR S47 OR S48
- S67 S19 OR S20 OR S21 OR S22 OR S23  
OR S24 OR S25 OR S26 OR S27 OR  
S28 OR S29 OR S30 OR S31 OR S32  
OR S33 OR S34 OR S35 OR S36 OR  
S37 OR S38 OR S39 OR S40
- S66 S7 OR S8 OR S9 OR S10 OR S11 OR  
S12 OR S13 OR S14 OR S15 OR S16  
OR S17 OR S18
- S65 S1 OR S2 OR S3 OR S4 OR S5 OR S6
- S64 TX quasi#experiment\* or  
quasi#random\* or quasi#control\*
- S63 TX allocat\* random\*
- S62 (MH "Quantitative Studies")
- S61 (MH "Placebos")
- S60 TX placebo\*
- S59 TX random\* allocat\*
- S58 (MH "Random Assignment")

S57 TX randomi\* control\* trial\*

S56 TX ( (singl\* n1 blind\*) or (singl\* n1 mask\*) )

S55 TX ( (doubl\* n1 blind\*) or (doubl\* n1 mask\*) )

S54 TX ( (tripl\* n1 blind\*) or (tripl\* n1 mask\*) )

S53 trebl\* n1 mask\*

S52 "trebl\* N1 blind\*\*"

S51 TX clinic\* n1 trial\*

S50 PT Clinical trial

S49 (MH "Clinical Trials+")

S48 (MH "Pneumonia, Aspiration")

S47 aspir\* N5 (feed\* or fluid\* or silent)

S46 aspir\* N5 (pneumonia\* or food\*)

S45 "oral and pharyngeal swallowing\*\*"

S44 "oro#pharyngeal swallowing\*\*"

S43 dysphagi\*

S42 swallow\* n5 (disorder\* or dysfunction\* or difficult\*)

S41 (MH "Deglutition Disorders")

S40 intervention\* or treatment\* or therap\* or rehab\*

S39 "surface emg\*\*"

S38 (MH "Biofeedback")

S37 "surface electromyograph\*\*"

S36 (MH "Electromyography")

S35 ""iowa oral performance instrument\*\*" or IOPI\*\*"

S34 ("oral pressure\*\*" or tongue\*) N5 (strengthen\* or exercis\*)

S33 EMST\*

S32 (expiratory or respiratory) N5 "muscle strength\*\*"

S31 "pharyn\* electric\* stimulation\*\*"

S30 "vitalstim\*\*"

S29 "neuro#muscular electric\* stimulation\*\*"

S28 (MH "Electric Stimulation")

S27 "transcutaneous electric nerve stimulation\*\*"

S26 "electric stimulation therap\*\*"

S25 head#lift\* or shaker\* or CTAR\* or "chin tuck against resistance\*\*"

S24 bol\* N5 (viscos\* or thick\* or rheology\*)

S23 fluid\* N5 (viscos\* or thick\* or rheology\*)

S22 diet\* N5 modif\*

S21 "thermal tactile stimulation\*\*" or TTS

S20 swallow\* N5 (exercise\* or therap\* or rehab\* or train\* or strengthen\* or man#euv\*)

S19 (MH "Swallowing Therapy")

S18 "intensive care\*\*" N5 "muscle weakness\*\*"

S17 ICU\* N5 "muscle weakness\*\*"

S16 "critical illness polyneuropath\*\*" or CIP or CIPN or "critical illness polymyopath\*\*"

S15 (MH "Polyneuropathies")

S14 "critical\* ill\*\*"

S13 (MH "Critical Illness")

S12 ICU\*

S11 "critical care\*\*"

S10 "intensive care\*\*"

S9 "early goal directed therapy"

S8 (MH "Critical Care")

S7 (MH "Stroke Units") OR (MH "Respiratory Care Units") OR (MH "Post Anesthesia Care Units") OR (MH "Coronary Care Units") OR (MH "Intensive Care Units") OR (MH "Burn Units")

S6 acute or hyper#acute or sub#acute

S5 acute N5 (care\* or setting\* or hospital\*)

S4 tertiary N5 (care\* or setting\* or inpatient\* or hospital\*)

- S3 (MH "Tertiary Health Care")
- S2 "acute inpatient\*" or "acute hospital\*"
- S1 (MH "Inpatients") OR (MH "Stroke Patients") OR (MH "Aged, Hospitalized") OR (MH "Burn Patients") OR (MH "Critically Ill Patients") OR (MH "Cancer Patients") OR (MH "Emergency Patients") OR (MH "Cardiac Patients").

### **Clinical Trials search strategy**

First search (31 March 2020)

intensive care | Interventional Studies | swallowing | Adult

acute | Interventional Studies | swallowing | Adult

intensive care | interventional studies | dysphagia | adult

acute | interventional studies | dysphagia | adult

intensive care | interventional studies | deglutition | adult

acute | interventional studies | deglutition | adult

Second search (31 March 2020)

deglutition and critical care and rehabilitation and adult

deglutition and critical care and therapeutics and adult

deglutition and critical care and intubation and adult

### **WHO ICTRP search strategy**

First search (31 March 2020)

intensive care | Interventional Studies | swallowing | Adult

acute | Interventional Studies | swallowing | Adult

intensive care | interventional studies | dysphagia | adult

acute | interventional studies | dysphagia | adult

intensive care | interventional studies | deglutition | adult

acute | interventional studies | deglutition | adult

Second search (31 March 2020)

deglutition and critical care and rehabilitation and adult

deglutition and critical care and therapeutics and adult

deglutition and critical care and intubation and adult



## Web of Science – 31 March 2020

- # 7 [1,321](#) #6 AND #5 AND #4 AND #3  
*Indexes=SCI-EXPANDED, SSCI, A&HCI, CPCI-S, CPCI-SSH, ESCI Timespan=All years*
- # 6 [1,476,991](#) #2 OR #1  
*Indexes=SCI-EXPANDED, SSCI, A&HCI, CPCI-S, CPCI-SSH, ESCI Timespan=All years*
- # 5 [4,766,279](#) **TOPIC:** (random\* or RCT or RCTs) OR **TOPIC:** (controlled NEAR/5 (trial\* or stud\*)) OR **TOPIC:** (clinical\* NEAR/5 trial\*) OR **TOPIC:** ((control or treatment or experiment\* or intervention) NEAR/5 (group\* or subject\* or patient\*)) OR **TOPIC:** ((control or experiment\* or conservative) NEAR/5 (treatment or therapy or procedure or manage\*)) OR **TOPIC:** ((singl\* or doubl\* or tripl\* or trebl\*) NEAR/5 (blind\* or mask\*)) OR **TOPIC:** ((cross-over or cross over or crossover)) OR **TOPIC:** ((placebo\* or sham)) OR **TOPIC:** (trial) OR **TOPIC:** (quasi\$experiment\* or quasi\$random\* or quasi\$control\*)  
*Indexes=SCI-EXPANDED, SSCI, A&HCI, CPCI-S, CPCI-SSH, ESCI Timespan=All years*
- # 4 [37,806](#) **TOPIC:** ((deglutit\* or swallow\*) near/5 (disorder\* or dysfunction\* or difficult\* or impair\*)) OR **TOPIC:** (dysphagi\*) OR **TOPIC:** ("oro\$paryngeal swallowing\*") OR **TOPIC:** ("oral and pharyngeal swallowing\*") OR **TOPIC:** (aspir\* near/5 (pneumonia\* or food\* or feed\* or fluid\* or silent))  
*Indexes=SCI-EXPANDED, SSCI, A&HCI, CPCI-S, CPCI-SSH, ESCI Timespan=All years*
- # 3 [7,251,586](#) **TOPIC:** (swallow\* near/5 (exercise\* or therap\* or rehab\* or train\* or strengthen\* or man\$eu\$\*)) OR **TOPIC:** ("thermal tactile stimulation\*" or TTS) OR **TOPIC:** (diet\* near/5 modif\*) OR **TOPIC:** ((fluid\* or bolus\* or boli) near/5 (viscos\* or thick\* or rheology\*)) OR **TOPIC:** (head\$lift\* or shaker\* or CTAR\* or "chin tuck against resistance\*") OR **TOPIC:** (electric\* near/5 stimulat\*) OR **TOPIC:** (vitalstim\*) OR **TOPIC:** ((expiratory or respiratory) near/5 "muscle strength\*") OR **TOPIC:** (EMST\*) OR **TOPIC:** (("oral pressure\*" or tongue\*) near/5 (strengthen\* or exercis\*)) OR **TOPIC:** ("iowa oral performance instrument\*" or IOPI\*) OR **TOPIC:** (electromyograph\* or "surface EMG\*" or biofeedback\*) OR **TOPIC:** (intervention\* or treatment\* or therap\* or rehab\*)  
*Indexes=SCI-EXPANDED, SSCI, A&HCI, CPCI-S, CPCI-SSH, ESCI Timespan=All years*
- # 2 [236,767](#) **TOPIC:** ("intensive care\*" or ICU\*) OR **TOPIC:** ("burn unit\*" or "coronary care unit\*" or "recovery room\*" or "respiratory care unit\*") OR **TOPIC:** ("critical care\*" or "critical\* ill\*") OR **TOPIC:** ("critical illness polyneuropath\*" or CIP or CIPN or "critical illness polymyopath\*") OR **TOPIC:** ((ICU\* or "intensive care\*") near/5 (musc\* near/5 weak\*))  
*Indexes=SCI-EXPANDED, SSCI, A&HCI, CPCI-S, CPCI-SSH, ESCI Timespan=All years*
- # 1 [1,296,127](#) **TOPIC:** (acute near/5 (care\* or setting\* or hospital\* or inpatient\*)) OR **TOPIC:** (tertiary near/5 (care\* or setting\* or inpatient\* or hospital\*)) OR **TOPIC:** (acute or hyper\$acute or sub\$acute)  
*Indexes=SCI-EXPANDED, SSCI, A&HCI, CPCI-S, CPCI-SSH, ESCI Timespan=All years*

## Appendix B: Data Extraction Form

Interventions for oropharyngeal dysphagia in acute and critical care.

|           |              |                    |                 |
|-----------|--------------|--------------------|-----------------|
| Study ID: | Lead author: | Reviewer initials: | Date of review: |
|-----------|--------------|--------------------|-----------------|

### GENERAL STUDY INFORMATION AND ELIGIBILITY

|                 |                       |                            |                                           |
|-----------------|-----------------------|----------------------------|-------------------------------------------|
| Title           | Authors               | Journal / Trial registry   | Year / volume / page numbers              |
| RCT<br>Yes / No | Quasi RCT<br>Yes / No | Cross-over RCT<br>Yes / No | Single / Multi centre and length of study |

| Participants                                                                                     | Setting                                                                                                    | Interventions                                                                                                                                                                                                                                                                                                                                                                                                                                                                   | Outcomes                                                                                                                                                                                                                                                                                                                                                        |
|--------------------------------------------------------------------------------------------------|------------------------------------------------------------------------------------------------------------|---------------------------------------------------------------------------------------------------------------------------------------------------------------------------------------------------------------------------------------------------------------------------------------------------------------------------------------------------------------------------------------------------------------------------------------------------------------------------------|-----------------------------------------------------------------------------------------------------------------------------------------------------------------------------------------------------------------------------------------------------------------------------------------------------------------------------------------------------------------|
| Adults, 18 years or older<br><br>Yes <input type="checkbox"/><br><br>No <input type="checkbox"/> | Acute hospital / acute care setting<br><br>Yes <input type="checkbox"/><br><br>No <input type="checkbox"/> | Electrical stimulation <input type="checkbox"/><br>Respiratory strength training <input type="checkbox"/><br>Tongue resistance training <input type="checkbox"/><br>Non-invasive brain stimulation <input type="checkbox"/><br>Swallow manoeuvre / exercise <input type="checkbox"/><br>Behavioural interventions <input type="checkbox"/><br>Texture and fluid modification <input type="checkbox"/><br>Acupuncture <input type="checkbox"/><br>Other <input type="checkbox"/> | Return to oral diet <input type="checkbox"/><br>Incidence of aspiration <input type="checkbox"/><br>Incidence of pneumonia <input type="checkbox"/><br>Nutritional status <input type="checkbox"/><br>Adverse incidents <input type="checkbox"/><br>Health related quality of life <input type="checkbox"/><br>Length of hospital stay <input type="checkbox"/> |

Do not proceed if any of the above answers are 'No'. If study to be included in "Excluded Studies" section of the review, please record below the information to be inserted into "Table of excluded studies".

**Exclusion reason:**

|                                                                    | <b>Intervention Group</b>                                | <b>Comparison Group 1</b>                                | <b>Comparison Group 2</b>                                |
|--------------------------------------------------------------------|----------------------------------------------------------|----------------------------------------------------------|----------------------------------------------------------|
| Participants (adults, >18 years)                                   | N =                                                      | N =                                                      | N =                                                      |
| Age                                                                | Mean:<br>SD:<br>Median:<br>IQR:                          | Mean:<br>SD:<br>Median:<br>IQR:                          | Mean:<br>SD:<br>Median:<br>IQR:                          |
| Gender                                                             | Male: N =<br>Female: N =                                 | Male: N =<br>Female: N =                                 | Male: N =<br>Female: N =                                 |
| Inclusion criteria:<br>(SPECIFIC TO TRIAL)                         |                                                          |                                                          |                                                          |
| Severity of illness scoring used:<br>(e.g. NIHSS, APACHE 2, SOFA,) | Mean:<br>SD:<br>Median:<br>IQR:                          | Mean:<br>SD:<br>Median:<br>IQR:                          | Mean:<br>SD:<br>Median:<br>IQR:                          |
| Frailty assessment completed:                                      | Yes <input type="checkbox"/> No <input type="checkbox"/> | Yes <input type="checkbox"/> No <input type="checkbox"/> | Yes <input type="checkbox"/> No <input type="checkbox"/> |
| Frailty score:                                                     | Tool used =<br>Mean:<br>SD:<br>Median:<br>IQR:           | Tool used =<br>Mean:<br>SD:<br>Median:<br>IQR:           | Tool used =<br>Mean:<br>SD:<br>Median:<br>IQR:           |
| Dysphagia severity score:<br>(e.g. DSS, MASA, FOIS)                | Tool used =<br>Mean:<br>SD:<br>Median:<br>IQR:           | Tool used =<br>Mean:<br>SD:<br>Median:<br>IQR:           | Tool used =<br>Mean:<br>SD:<br>Median:<br>IQR:           |

|  |  |  |  |
|--|--|--|--|
|  |  |  |  |
|--|--|--|--|

**PARTICIPANTS**

*NIHSS* National Institute of Health Stroke Scale, *APACHE* Acute Physiology and Chronic Health Evaluation II, *SOFA* Sequential Organ Failure Assessment, *DSS* Dysphagia Severity Scale, *MASA* Mann Assessment of Swallowing Ability, *FOIS* Functional Oral Intake Scale, *SD* Standard Deviation, *IQR* interquartile range.

**SETTING DETAILS**

| Country | Type of acute setting                                                                                                                                                                                                                                                                               | Type of hospital                                                                            |
|---------|-----------------------------------------------------------------------------------------------------------------------------------------------------------------------------------------------------------------------------------------------------------------------------------------------------|---------------------------------------------------------------------------------------------|
|         | Intensive care unit <input type="checkbox"/><br>High dependency unit <input type="checkbox"/><br>Acute stroke unit <input type="checkbox"/><br>Acute hospital ward <input type="checkbox"/><br>Acute rehabilitation unit <input type="checkbox"/><br>Other, please specify <input type="checkbox"/> | University affiliated <input type="checkbox"/><br>General hospital <input type="checkbox"/> |

**INTERVENTION DETAILS**

(as per TIDieR checklist)

|                                                                                                     | <b>Intervention Group</b>                                                                                                                                                                                                                                                           | <b>Comparison Group 1</b>                                                                                                                                                                                                                                                           | <b>Comparison Group 2</b>                                                                                                                                                                                                                                                           |
|-----------------------------------------------------------------------------------------------------|-------------------------------------------------------------------------------------------------------------------------------------------------------------------------------------------------------------------------------------------------------------------------------------|-------------------------------------------------------------------------------------------------------------------------------------------------------------------------------------------------------------------------------------------------------------------------------------|-------------------------------------------------------------------------------------------------------------------------------------------------------------------------------------------------------------------------------------------------------------------------------------|
| Name and description of intervention                                                                |                                                                                                                                                                                                                                                                                     |                                                                                                                                                                                                                                                                                     |                                                                                                                                                                                                                                                                                     |
| Intervention materials and procedures.                                                              | Intervention materials described Y <input type="checkbox"/> N <input type="checkbox"/><br><br>Materials accessible Y <input type="checkbox"/> N <input type="checkbox"/><br><br>Intervention procedure & activities described Y <input type="checkbox"/> N <input type="checkbox"/> | Intervention materials described Y <input type="checkbox"/> N <input type="checkbox"/><br><br>Materials accessible Y <input type="checkbox"/> N <input type="checkbox"/><br><br>Intervention procedure & activities described Y <input type="checkbox"/> N <input type="checkbox"/> | Intervention materials described Y <input type="checkbox"/> N <input type="checkbox"/><br><br>Materials accessible Y <input type="checkbox"/> N <input type="checkbox"/><br><br>Intervention procedure & activities described Y <input type="checkbox"/> N <input type="checkbox"/> |
| Mode of delivery                                                                                    | Face to face Y <input type="checkbox"/> N <input type="checkbox"/><br><br>Individual Y <input type="checkbox"/> N <input type="checkbox"/><br><br>Group Y <input type="checkbox"/> N <input type="checkbox"/>                                                                       | Face to face Y <input type="checkbox"/> N <input type="checkbox"/><br><br>Individual Y <input type="checkbox"/> N <input type="checkbox"/><br><br>Group Y <input type="checkbox"/> N <input type="checkbox"/>                                                                       | Face to face Y <input type="checkbox"/> N <input type="checkbox"/><br><br>Individual Y <input type="checkbox"/> N <input type="checkbox"/><br><br>Group Y <input type="checkbox"/> N <input type="checkbox"/>                                                                       |
| Personnel delivering the intervention; their expertise, background and any specific training given. | SLT <input type="checkbox"/><br>Nurse <input type="checkbox"/><br>Healthcare assistant <input type="checkbox"/><br>Rehab assistant <input type="checkbox"/><br>Family member <input type="checkbox"/><br>Other <input type="checkbox"/>                                             | SLT <input type="checkbox"/><br>Nurse <input type="checkbox"/><br>Healthcare assistant <input type="checkbox"/><br>Rehab assistant <input type="checkbox"/><br>Family member <input type="checkbox"/><br>Other <input type="checkbox"/>                                             | SLT <input type="checkbox"/><br>Nurse <input type="checkbox"/><br>Healthcare assistant <input type="checkbox"/><br>Rehab assistant <input type="checkbox"/><br>Family member <input type="checkbox"/><br>Other <input type="checkbox"/>                                             |
| Intervention protocol.                                                                              | Number of sessions included Y <input type="checkbox"/> N <input type="checkbox"/>                                                                                                                                                                                                   | Number of sessions included Y <input type="checkbox"/> N <input type="checkbox"/>                                                                                                                                                                                                   | Number of sessions included Y <input type="checkbox"/> N <input type="checkbox"/>                                                                                                                                                                                                   |

|                                                                                                                 |                                                                                                                                                                                   |                                                                                                                                                                                      |                                                                                                                                                                                      |
|-----------------------------------------------------------------------------------------------------------------|-----------------------------------------------------------------------------------------------------------------------------------------------------------------------------------|--------------------------------------------------------------------------------------------------------------------------------------------------------------------------------------|--------------------------------------------------------------------------------------------------------------------------------------------------------------------------------------|
| Describe the number of times the intervention was delivered and over what time period including their duration. | Session duration included Y<br><input type="checkbox"/> N <input type="checkbox"/><br><br>Intervention time period included Y <input type="checkbox"/> N <input type="checkbox"/> | Session duration included<br>Y <input type="checkbox"/> N <input type="checkbox"/><br><br>Intervention time period included<br>Y <input type="checkbox"/> N <input type="checkbox"/> | Session duration included<br>Y <input type="checkbox"/> N <input type="checkbox"/><br><br>Intervention time period included<br>Y <input type="checkbox"/> N <input type="checkbox"/> |
| Intervention adaptation.                                                                                        | Adapted / Tailored<br>Y <input type="checkbox"/> N <input type="checkbox"/>                                                                                                       | Adapted / Tailored<br>Y <input type="checkbox"/> N <input type="checkbox"/>                                                                                                          | Adapted / Tailored<br>Y <input type="checkbox"/> N <input type="checkbox"/>                                                                                                          |
| Intervention modification                                                                                       | Modified Y <input type="checkbox"/> N <input type="checkbox"/>                                                                                                                    | Modified Y <input type="checkbox"/> N <input type="checkbox"/>                                                                                                                       | Modified Y <input type="checkbox"/> N <input type="checkbox"/>                                                                                                                       |
| Intervention adherence / fidelity.                                                                              | Adherence assessed<br><br>Y <input type="checkbox"/> N <input type="checkbox"/>                                                                                                   | Adherence assessed<br><br>Y <input type="checkbox"/> N <input type="checkbox"/>                                                                                                      | Adherence assessed<br><br>Y <input type="checkbox"/> N <input type="checkbox"/>                                                                                                      |

## SAMPLE SIZE

|             | <b>Intervention Group</b>                                      | <b>Comparison Group 1</b>                                      | <b>Comparison Group 2</b>                                      |
|-------------|----------------------------------------------------------------|----------------------------------------------------------------|----------------------------------------------------------------|
| Sample size | Number recruited =<br>Number randomised =<br>Number analysed = | Number recruited =<br>Number randomised =<br>Number analysed = | Number recruited =<br>Number randomised =<br>Number analysed = |

## OUTCOMES

Table of numeric content.

|                                                                                                                                         | Intervention Group              | Comparison Group 1              | Comparison Group 2              |
|-----------------------------------------------------------------------------------------------------------------------------------------|---------------------------------|---------------------------------|---------------------------------|
| <b>Primary outcomes</b>                                                                                                                 |                                 |                                 |                                 |
| Time taken in days from onset of treatment for participants to return to a functional diet (as measured by relevant tool such as FOIS). | Mean:<br>SD:<br>Median:<br>IQR: | Mean:<br>SD:<br>Median:<br>IQR: | Mean:<br>SD:<br>Median:<br>IQR: |
| Incidence of aspiration as rated by VFS or FEES using PAS                                                                               | Mean:<br>SD:<br>Median:<br>IQR: | Mean:<br>SD:<br>Median:<br>IQR: | Mean:<br>SD:<br>Median:<br>IQR: |
| <b>Secondary outcomes</b>                                                                                                               |                                 |                                 |                                 |
| Nutritional status as measured by a validated nutrition screening tool (e.g. MUST) or similar as described by authors.                  | Mean:<br>SD:<br>Median:<br>IQR: | Mean:<br>SD:<br>Median:<br>IQR: | Mean:<br>SD:<br>Median:<br>IQR: |
| Change in secretion severity as rated by FEES using a validated scale such as NZSS or SRS.                                              | Mean:<br>SD:<br>Median:<br>IQR: | Mean:<br>SD:<br>Median:<br>IQR: | Mean:<br>SD:<br>Median:<br>IQR: |
| Change in residue severity as rated by VFS or FEES using a validated scale such as YRS.                                                 | Mean:<br>SD:<br>Median:<br>IQR: | Mean:<br>SD:<br>Median:<br>IQR: | Mean:<br>SD:<br>Median:<br>IQR: |

|                                                                                                                                                                                                                                                                                                                                                  |                                 |                                 |                                 |
|--------------------------------------------------------------------------------------------------------------------------------------------------------------------------------------------------------------------------------------------------------------------------------------------------------------------------------------------------|---------------------------------|---------------------------------|---------------------------------|
| Adverse events associated with intervention such as patient discomfort, deterioration in swallow function or physiological parameter as per instrumental assessment.                                                                                                                                                                             | n / N =                         | n / N =                         | n / N =                         |
| Incidence of pneumonia as measured by the presence of a new or worsening chest X-ray or computed tomography (CT) change consistent with pneumonia in the context of at least two of the following: temperature < 35 °C or > 38 °C; a white cell count of < 4 × 10 <sup>9</sup> / L or > 11×10 <sup>9</sup> / L; or purulent tracheal secretions. | n / N=                          | n / N=                          | n / N=                          |
| Length of hospital stay                                                                                                                                                                                                                                                                                                                          | Mean:<br>SD:<br>Median:<br>IQR: | Mean:<br>SD:<br>Median:<br>IQR: | Mean:<br>SD:<br>Median:<br>IQR: |
| Quality of life as measured by a validated dysphagia quality of life scale (e.g. SWALQOL, DHI).                                                                                                                                                                                                                                                  | Mean:<br>SD:<br>Median:<br>IQR: | Mean:<br>SD:<br>Median:<br>IQR: | Mean:<br>SD:<br>Median:<br>IQR: |

VFS Videofluoroscopy, FEES Fibreoptic endoscopic evaluation of swallowing, PAS Penetration Aspiration Scale, NZSS New Zealand Secretion Scale, SRS Secretion rating scale, YRS Yale Residue Scale, MUST Malnutrition Universal Screening Tool, SWALQOL Swallowing Quality of Life Scale, DHI Dysphagia Handicap Index.



## OUTCOMES

Table of descriptive content

(Four components in each outcome addressed as per SPIRIT 2013 Checklist).

|                                                                                                                                                                              | <b>Intervention group</b>                                                                                                                                                                                              | <b>Control group 1</b>                                                                                                                                                                                                 | <b>Control group 2</b>                                                                                                                                                                                                 |
|------------------------------------------------------------------------------------------------------------------------------------------------------------------------------|------------------------------------------------------------------------------------------------------------------------------------------------------------------------------------------------------------------------|------------------------------------------------------------------------------------------------------------------------------------------------------------------------------------------------------------------------|------------------------------------------------------------------------------------------------------------------------------------------------------------------------------------------------------------------------|
| <p><b>Primary outcome</b></p> <p>Time taken in days from onset of treatment for participants to return to a functional diet (as measured by relevant tool such as FOIS).</p> | <p>Reported / Not reported</p> <p>Definition provided Y/N<br/><i>(specific measurement variable)</i></p> <p>Measurement units<br/><i>(analysis metric and method of aggregation)</i></p> <p>Measurement time-point</p> | <p>Reported / Not reported</p> <p>Definition provided Y/N<br/><i>(specific measurement variable)</i></p> <p>Measurement units<br/><i>(analysis metric and method of aggregation)</i></p> <p>Measurement time-point</p> | <p>Reported / Not reported</p> <p>Definition provided Y/N<br/><i>(specific measurement variable)</i></p> <p>Measurement units<br/><i>(analysis metric and method of aggregation)</i></p> <p>Measurement time-point</p> |
| <p>Incidence of aspiration as rated by VFS or FEES using PAS</p>                                                                                                             | <p>Reported / Not reported</p> <p>Definition provided Y/N<br/><i>(specific measurement variable)</i></p> <p>Measurement units</p>                                                                                      | <p>Reported / Not reported</p> <p>Definition provided Y/N<br/><i>(specific measurement variable)</i></p> <p>Measurement units</p>                                                                                      | <p>Reported / Not reported</p> <p>Definition provided Y/N<br/><i>(specific measurement variable)</i></p> <p>Measurement units</p>                                                                                      |

|                                                                                                                                                     |                                                                                                                                                                                                               |                                                                                                                                                                                                               |                                                                                                                                                                                                               |
|-----------------------------------------------------------------------------------------------------------------------------------------------------|---------------------------------------------------------------------------------------------------------------------------------------------------------------------------------------------------------------|---------------------------------------------------------------------------------------------------------------------------------------------------------------------------------------------------------------|---------------------------------------------------------------------------------------------------------------------------------------------------------------------------------------------------------------|
|                                                                                                                                                     | <i>(analysis metric and method of aggregation)</i><br><br>Measurement time-point                                                                                                                              | <i>(analysis metric and method of aggregation)</i><br><br>Measurement time-point                                                                                                                              | <i>(analysis metric and method of aggregation)</i><br><br>Measurement time-point                                                                                                                              |
| <b>Secondary outcomes</b><br>Nutritional status as measured by a validated nutrition screening tool (e.g. MUST) or similar as described by authors. | Reported / Not reported<br><br>Definition provided Y/N<br><i>(specific measurement variable)</i><br><br>Measurement units<br><i>(analysis metric and method of aggregation)</i><br><br>Measurement time-point | Reported / Not reported<br><br>Definition provided Y/N<br><i>(specific measurement variable)</i><br><br>Measurement units<br><i>(analysis metric and method of aggregation)</i><br><br>Measurement time-point | Reported / Not reported<br><br>Definition provided Y/N<br><i>(specific measurement variable)</i><br><br>Measurement units<br><i>(analysis metric and method of aggregation)</i><br><br>Measurement time-point |
| Change in secretion severity as rated by FEES using a validated scale such as NZSS or SRS.                                                          | Reported / Not reported<br><br>Definition provided Y/N<br><i>(specific measurement variable)</i><br><br>Measurement units<br><i>(analysis metric and method of aggregation)</i><br><br>Measurement time-point | Reported / Not reported<br><br>Definition provided Y/N<br><i>(specific measurement variable)</i><br><br>Measurement units<br><i>(analysis metric and method of aggregation)</i><br><br>Measurement time-point | Reported / Not reported<br><br>Definition provided Y/N<br><i>(specific measurement variable)</i><br><br>Measurement units<br><i>(analysis metric and method of aggregation)</i><br><br>Measurement time-point |

|                                                                                                                                                                               |                                                                                                                                                                                                                        |                                                                                                                                                                                                                        |                                                                                                                                                                                                                        |
|-------------------------------------------------------------------------------------------------------------------------------------------------------------------------------|------------------------------------------------------------------------------------------------------------------------------------------------------------------------------------------------------------------------|------------------------------------------------------------------------------------------------------------------------------------------------------------------------------------------------------------------------|------------------------------------------------------------------------------------------------------------------------------------------------------------------------------------------------------------------------|
| <p>Change in residue severity as rated by VFS or FEES using a validated scale such as YRS.</p>                                                                                | <p>Reported / Not reported</p> <p>Definition provided Y/N<br/><i>(specific measurement variable)</i></p> <p>Measurement units<br/><i>(analysis metric and method of aggregation)</i></p> <p>Measurement time-point</p> | <p>Reported / Not reported</p> <p>Definition provided Y/N<br/><i>(specific measurement variable)</i></p> <p>Measurement units<br/><i>(analysis metric and method of aggregation)</i></p> <p>Measurement time-point</p> | <p>Reported / Not reported</p> <p>Definition provided Y/N<br/><i>(specific measurement variable)</i></p> <p>Measurement units<br/><i>(analysis metric and method of aggregation)</i></p> <p>Measurement time-point</p> |
| <p>Adverse events associated with intervention such as patient discomfort, deterioration in swallow function or physiological parameter as per instrumental assessment.</p>   | <p>Reported / Not reported</p> <p>Definition provided Y/N<br/><i>(specific measurement variable)</i></p> <p>Measurement units<br/><i>(analysis metric and method of aggregation)</i></p> <p>Measurement time-point</p> | <p>Reported / Not reported</p> <p>Definition provided Y/N<br/><i>(specific measurement variable)</i></p> <p>Measurement units<br/><i>(analysis metric and method of aggregation)</i></p> <p>Measurement time-point</p> | <p>Reported / Not reported</p> <p>Definition provided Y/N<br/><i>(specific measurement variable)</i></p> <p>Measurement units<br/><i>(analysis metric and method of aggregation)</i></p> <p>Measurement time-point</p> |
| <p>Incidence of pneumonia as measured by the presence of a new or worsening chest X-ray or computed tomography (CT) change consistent with pneumonia in the context of at</p> | <p>Reported / Not reported</p> <p>Definition provided Y/N<br/><i>(specific measurement variable)</i></p>                                                                                                               | <p>Reported / Not reported</p> <p>Definition provided Y/N<br/><i>(specific measurement variable)</i></p>                                                                                                               | <p>Reported / Not reported</p> <p>Definition provided Y/N<br/><i>(specific measurement variable)</i></p>                                                                                                               |

|                                                                                                                                                                                                                |                                                                                                                                                                                                                               |                                                                                                                                                                                                                               |                                                                                                                                                                                                                               |
|----------------------------------------------------------------------------------------------------------------------------------------------------------------------------------------------------------------|-------------------------------------------------------------------------------------------------------------------------------------------------------------------------------------------------------------------------------|-------------------------------------------------------------------------------------------------------------------------------------------------------------------------------------------------------------------------------|-------------------------------------------------------------------------------------------------------------------------------------------------------------------------------------------------------------------------------|
| <p>least two of the following:<br/> temperature &lt; 35 °C or &gt; 38 °C;<br/> a white cell count of &lt; 4 × 10<sup>9</sup> / L<br/> or &gt; 11×10<sup>9</sup> / L; or purulent<br/> tracheal secretions.</p> | <p>Measurement units<br/> <i>(analysis metric and method of<br/> aggregation)</i></p> <p>Measurement time-point</p>                                                                                                           | <p>Measurement units<br/> <i>(analysis metric and method of<br/> aggregation)</i></p> <p>Measurement time-point</p>                                                                                                           | <p>Measurement units<br/> <i>(analysis metric and method of<br/> aggregation)</i></p> <p>Measurement time-point</p>                                                                                                           |
| <p>Length of hospital stay</p>                                                                                                                                                                                 | <p>Reported / Not reported</p> <p>Definition provided Y/N<br/> <i>(specific measurement variable)</i></p> <p>Measurement units<br/> <i>(analysis metric and method of<br/> aggregation)</i></p> <p>Measurement time-point</p> | <p>Reported / Not reported</p> <p>Definition provided Y/N<br/> <i>(specific measurement variable)</i></p> <p>Measurement units<br/> <i>(analysis metric and method of<br/> aggregation)</i></p> <p>Measurement time-point</p> | <p>Reported / Not reported</p> <p>Definition provided Y/N<br/> <i>(specific measurement variable)</i></p> <p>Measurement units<br/> <i>(analysis metric and method of<br/> aggregation)</i></p> <p>Measurement time-point</p> |
| <p>Quality of life as measured by a<br/> validated dysphagia quality of life<br/> scale (e.g. SWALQOL, DHI).</p>                                                                                               | <p>Reported / Not reported</p> <p>Definition provided Y/N<br/> <i>(specific measurement variable)</i></p> <p>Measurement units<br/> <i>(analysis metric and method of<br/> aggregation)</i></p>                               | <p>Reported / Not reported</p> <p>Definition provided Y/N<br/> <i>(specific measurement variable)</i></p> <p>Measurement units<br/> <i>(analysis metric and method of<br/> aggregation)</i></p>                               | <p>Reported / Not reported</p> <p>Definition provided Y/N<br/> <i>(specific measurement variable)</i></p> <p>Measurement units<br/> <i>(analysis metric and method of<br/> aggregation)</i></p>                               |

|  |                        |                        |                        |
|--|------------------------|------------------------|------------------------|
|  | Measurement time-point | Measurement time-point | Measurement time-point |
|--|------------------------|------------------------|------------------------|

## METHODOLOGICAL QUALITY

Please refer to Cochrane Risk of Bias Table for additional details.

| <b>Domain</b>                                   | <b>Description</b>                                                                                                                                                        | <b>Reviewer's judgment</b>                                                                                       |
|-------------------------------------------------|---------------------------------------------------------------------------------------------------------------------------------------------------------------------------|------------------------------------------------------------------------------------------------------------------|
| <b>Sequence generation</b>                      | Method used for sequence generation:                                                                                                                                      | Was the allocation sequence adequately generated to avoid selection bias?<br><br>Yes / No / Unclear              |
| <b>Allocation concealment</b>                   | Methods used to conceal allocation to group:                                                                                                                              | Was allocation adequately concealed to prevent selection bias?<br><br>Yes / No / Unclear                         |
| <b>Blinding of participants &amp; personnel</b> | Description of measures used to prevent study participants and personnel from knowledge of the intervention group assigned and effectiveness of these measures, if known: | Was knowledge of the allocated intervention adequately prevented during the study?<br><br>Yes / No / Unclear     |
| <b>Blinding of outcome assessors</b>            | Description of any measures used to prevent knowledge of the assigned intervention by the outcome assessors and effectiveness, if known:                                  | Was knowledge of the allocated intervention by outcome assessors adequately prevented?<br><br>Yes / No / Unclear |

|                                    |                                                                                                           |                                                                                                       |
|------------------------------------|-----------------------------------------------------------------------------------------------------------|-------------------------------------------------------------------------------------------------------|
| <b>Incomplete outcome data</b>     | Description of the completeness of outcome data and reporting of attrition and exclusions:                | Were incomplete outcome data adequately addressed?<br><br>Yes / No / Unclear                          |
| <b>Selective outcome reporting</b> | Consider time lag to publication; language; duplicate publication; citation reporting; outcome reporting. | Are reports of the study free of suggestion of selective outcome reporting?<br><br>Yes / No / Unclear |
| <b>Other sources of bias</b>       | Description:                                                                                              | Is the study free from other sources of bias?<br><br>Yes / No / Unclear                               |

## Appendix C: Intervention descriptions of included studies using TIDieR<sup>19</sup>

Bath et al 2016 <sup>[27]</sup>

| TIDieR item number | Item descriptor                                | Item                                                                                                                                                                                                                                                                                                                                                                                                                                                                                                                                                                                    |
|--------------------|------------------------------------------------|-----------------------------------------------------------------------------------------------------------------------------------------------------------------------------------------------------------------------------------------------------------------------------------------------------------------------------------------------------------------------------------------------------------------------------------------------------------------------------------------------------------------------------------------------------------------------------------------|
| 1                  | Brief name                                     | Pharyngeal electrical stimulation, Phagenyx, Phagenesis Ltd., Manchester, UK.                                                                                                                                                                                                                                                                                                                                                                                                                                                                                                           |
| 2                  | Why                                            | Using this approach in patients with subacute stroke in a randomized dose-comparison trial, PES reduced radiological aspiration. An individual patient data meta-analysis of these 3 trials found that PES significantly reduced aspiration and dysphagia and was safe and well tolerated                                                                                                                                                                                                                                                                                               |
| 3                  | What materials & procedures                    | Sterile single-patient use treatment catheters which contain an inner lumen for feeding, were inserted via the nose by trained staff. The catheter was inserted to an aboral depth related to the patient's height so that the pair of ring treatment electrodes located on the outer surface of the catheter were adjacent to the pharynx. Treatment was started once dysphagia was confirmed by videofluoroscopy. At each session, the catheter was connected to the controlling base station, and electric current at 5 Hz was increased incrementally from 1 mA to detect threshold |
| 4                  | Expertise / training of intervention providers | Staff were trained to pass catheter trans nasally but details of this training was not provided. No details given on expertise, professional background or training received by personnel delivering PES treatment.                                                                                                                                                                                                                                                                                                                                                                     |
| 5                  | Mode of delivery                               | Face to face and individual                                                                                                                                                                                                                                                                                                                                                                                                                                                                                                                                                             |
| 6                  | Where                                          | Acute stroke unit in UK hospitals.                                                                                                                                                                                                                                                                                                                                                                                                                                                                                                                                                      |
| 7                  | When and how much                              | 10 minutes daily over 3 consecutive days                                                                                                                                                                                                                                                                                                                                                                                                                                                                                                                                                |
| 8                  | Tailoring of the intervention                  | At each session, the catheter was connected to the controlling base station, and electric current at 5 Hz was increased incrementally from 1 mA to detect threshold (patient first aware of stimulation) and then tolerated (patient does not want current increased further) intensity levels in all patients.                                                                                                                                                                                                                                                                         |

|           |                                            |                                                                                              |
|-----------|--------------------------------------------|----------------------------------------------------------------------------------------------|
| <b>9</b>  | Modifications of intervention during study | No intervention modification described in study or stated explicitly that this was assessed. |
| <b>10</b> | Planned adherence assessment               | An assessment of adherence was not planned for in this study.                                |
| <b>11</b> | Actual adherence                           | 9/87 did not receive allocated intervention.                                                 |

Carnaby et al 2006 [28]

| <b>TIDieR item number</b> | <b>Item descriptor</b>                         | <b>Item</b>                                                                                                                                                                                                                                                                                                                                                                                                                                                                                                                                                                                                                                                                                                   |
|---------------------------|------------------------------------------------|---------------------------------------------------------------------------------------------------------------------------------------------------------------------------------------------------------------------------------------------------------------------------------------------------------------------------------------------------------------------------------------------------------------------------------------------------------------------------------------------------------------------------------------------------------------------------------------------------------------------------------------------------------------------------------------------------------------|
| <b>1</b>                  | Brief name                                     | Behavioural intervention included indirect behavioural strategies (eg, modification of food consistency) and direct behavioural strategies (eg, stimulation of oral and pharyngeal structures).                                                                                                                                                                                                                                                                                                                                                                                                                                                                                                               |
| <b>2</b>                  | Why                                            | The primary aim of this study was to ascertain whether a standard behavioural intervention for swallowing dysfunction after stroke, given by a speech pathologist for up to a month after stroke, could improve swallowing function, as measured by the proportion of patients returning to a normal (pre stroke) diet by 6 months after stroke, compared with usual care in hospital.                                                                                                                                                                                                                                                                                                                        |
| <b>3</b>                  | What materials and procedures                  | Standard low-intensity swallowing therapy was composed of swallowing compensation strategies, mainly environmental modifications (eg, upright positioning for feeding); safe swallowing advice (eg, reduced rate of eating); and appropriate dietary modification. The choice of specific swallowing compensation strategies was directed by the findings of the clinical swallowing examination and videofluoroscopy (at baseline and at follow up, if necessary). Standard high-intensity swallowing therapy consisted of direct swallowing exercises (eg, effortful swallowing, supraglottic swallow technique) and appropriate dietary modification, under the direction of the study speech pathologist, |
| <b>4</b>                  | Expertise / training of intervention providers | Study SLTs delivered either low or high intensity swallowing treatment. Details of their expertise and training were not given.                                                                                                                                                                                                                                                                                                                                                                                                                                                                                                                                                                               |
| <b>5</b>                  | Mode of delivery                               | Face to face and on individual basis                                                                                                                                                                                                                                                                                                                                                                                                                                                                                                                                                                                                                                                                          |



|           |                                            |                                                                                                                                                                                                                                                                                                                                                                                                                                                                                                                 |
|-----------|--------------------------------------------|-----------------------------------------------------------------------------------------------------------------------------------------------------------------------------------------------------------------------------------------------------------------------------------------------------------------------------------------------------------------------------------------------------------------------------------------------------------------------------------------------------------------|
| <b>6</b>  | Where                                      | Acute stroke unit in acute hospital setting.                                                                                                                                                                                                                                                                                                                                                                                                                                                                    |
| <b>7</b>  | When and how much                          | Standard low-intensity treatment was given three times per week for a month, or for the duration of the hospital stay (if less than a month). Both high and low intensity sessions lasted 24 minutes each. The average time period for delivery of high-intensity treatment was 11 days. The average time period for delivery of low-intensity treatment was 16.7 days. The average number of sessions of high intensity delivered was 11.6. The average number of sessions of low-intensity delivered was 7.8. |
| <b>8</b>  | Tailoring of the intervention              | Yes. The choice of swallow compensatory strategies and choice of swallow exercises in low and high intensity groups respectively was directed by clinical and videofluoroscopy findings of each individual patient.                                                                                                                                                                                                                                                                                             |
| <b>9</b>  | Modifications of intervention during study | This was not stated in the study                                                                                                                                                                                                                                                                                                                                                                                                                                                                                |
| <b>10</b> | Planned adherence assessment               | Planned assessment of adherence not stated in this study                                                                                                                                                                                                                                                                                                                                                                                                                                                        |
| <b>11</b> | Actual adherence                           | 188/204 completed the intervention.                                                                                                                                                                                                                                                                                                                                                                                                                                                                             |

Chen et al 2016 <sup>[29]</sup>

| <b>TIDieR item number</b> | <b>Item descriptor</b>      | <b>Item</b>                                                                                                                                                                                                                                                                                                                                                                                                                               |
|---------------------------|-----------------------------|-------------------------------------------------------------------------------------------------------------------------------------------------------------------------------------------------------------------------------------------------------------------------------------------------------------------------------------------------------------------------------------------------------------------------------------------|
| <b>1</b>                  | Brief name                  | Acupuncture                                                                                                                                                                                                                                                                                                                                                                                                                               |
| <b>2</b>                  | Why                         | Some studies showed positive but limited effectiveness of acupuncture as an adjunct treatment to conventional swallowing rehabilitation.                                                                                                                                                                                                                                                                                                  |
| <b>3</b>                  | What materials & procedures | All patients received conventional stroke rehabilitation including normal limb posture, passive exercises on hemiplegic side, Bobath technique, neuromuscular electrical stimulation and swallow training for dysphagia. Acupuncture points in scalp involved two to three needles penetrating top midline, the motor region and sensory region of the lesioned side. Acupuncture points for dysphagia were added: GB20 (Fenchi), EX-HN14 |

|           |                                                |                                                                                                                                                                                                                                                                                                                                                                                                        |
|-----------|------------------------------------------------|--------------------------------------------------------------------------------------------------------------------------------------------------------------------------------------------------------------------------------------------------------------------------------------------------------------------------------------------------------------------------------------------------------|
|           |                                                | (Yiming), BL10 (Tianzhu), GV16 (Fengfu), Gongzue (1 cm below GB20) and CV23 (Lianquan).                                                                                                                                                                                                                                                                                                                |
| <b>4</b>  | Expertise / training of intervention providers | The acupuncture was performed by three acupuncture doctors who have a master degree with more than five years of clinical experience, and had been trained previously to perform the same protocols                                                                                                                                                                                                    |
| <b>5</b>  | Mode of delivery                               | Face to face assumed but not clearly stated in study.                                                                                                                                                                                                                                                                                                                                                  |
| <b>6</b>  | Where                                          | Acute hospital setting                                                                                                                                                                                                                                                                                                                                                                                 |
| <b>7</b>  | When and how much                              | The rehabilitation program (including physiotherapy and occupational therapy for two hours per day, six days per week) for each participant was developed by the rehabilitation team according to the investigator's brochure. The acupuncture group also received additional thirty minutes of acupuncture therapy as bedside treatment, six days per week for three weeks (eighteen total sessions). |
| <b>8</b>  | Tailoring of the intervention                  | This was not stated in study.                                                                                                                                                                                                                                                                                                                                                                          |
| <b>9</b>  | Modifications of intervention during study     | The study did not state that the intervention was modified.                                                                                                                                                                                                                                                                                                                                            |
| <b>10</b> | Planned adherence assessment                   | No formal assessment of intervention adherence was stated in this study.                                                                                                                                                                                                                                                                                                                               |
| <b>11</b> | Actual adherence                               | 120/125 completed this intervention                                                                                                                                                                                                                                                                                                                                                                    |

Du et al 2016 <sup>[30]</sup>

| <b>TIDieR item number</b> | <b>Item descriptor</b>        | <b>Item</b>                                                                                                                                                                                                                                                                                                                         |
|---------------------------|-------------------------------|-------------------------------------------------------------------------------------------------------------------------------------------------------------------------------------------------------------------------------------------------------------------------------------------------------------------------------------|
| <b>1</b>                  | Brief name                    | Repetitive transcranial magnetic stimulation (rTMS) is a safe, painless, and non-invasive method of stimulation for modulating cortical excitability                                                                                                                                                                                |
| <b>2</b>                  | Why                           | Studies have found that rTMS over the swallowing motor cortex induced the excitability of direct corticobulbar projections to the swallowing muscles, thereby enhancing swallowing functions. However, few studies have compared the effects of high-frequency versus low-frequency stimulation on dysphagia patients after stroke. |
| <b>3</b>                  | What materials and procedures | Patients seated and electromyography recordings (Danteckeypoint, Skovlunde, Denmark) from mylohyoid                                                                                                                                                                                                                                 |

|           |                                                |                                                                                                                                                                                                                                                                                                                                                                                                                                                                                                                                                                                                                                                                                                 |
|-----------|------------------------------------------------|-------------------------------------------------------------------------------------------------------------------------------------------------------------------------------------------------------------------------------------------------------------------------------------------------------------------------------------------------------------------------------------------------------------------------------------------------------------------------------------------------------------------------------------------------------------------------------------------------------------------------------------------------------------------------------------------------|
|           |                                                | muscles were detected using two pairs of surface electrodes placed submentally. All magnetic stimulations were carried out using a MagPro X100 Stimulator (MagVenture company, Farum, Denmark) with a figure of 8 coil. Single pulse TMS was applied to both hemispheres separately in order to measure cortical excitability and motor evoked potential for each patient.                                                                                                                                                                                                                                                                                                                      |
| <b>4</b>  | Expertise / training of intervention providers | Stimulation was performed by one investigator but not details provided of their professional background, expertise or specific training.                                                                                                                                                                                                                                                                                                                                                                                                                                                                                                                                                        |
| <b>5</b>  | Mode of delivery                               | Individual and face to face.                                                                                                                                                                                                                                                                                                                                                                                                                                                                                                                                                                                                                                                                    |
| <b>6</b>  | Where                                          | Acute hospital ward                                                                                                                                                                                                                                                                                                                                                                                                                                                                                                                                                                                                                                                                             |
| <b>7</b>  | When and how much                              | Each patient received rTMS daily for 5 consecutive days. Patients in the high-frequency stimulation group received 3-Hz rTMS for 10 s, with an inter-train interval of 10 s, and 40 trains with a total of 1200 pulses at 90% rMT on the affected hemisphere. For low-frequency stimulation, patients received 1-Hz rTMS for 30 s, with an inter-train interval of 2 s, and 40 trains with a total of 1200 pulses at 100% rMT on the unaffected hemisphere. The coil was oriented at an angle of approximately 45° over the “hot spot” of the hemisphere in the 3-Hz and 1-Hz rTMS groups.                                                                                                      |
| <b>8</b>  | Tailoring of the intervention                  | Single-pulse TMS was applied to both hemispheres separately in order to measure cortical excitability (resting motor threshold (rMT) and the motor evoked potential (MEP)) for each patient. The coil was first located at the vertex of cranium, then positioned 2–4 cm anteriorly and 4–6 cm laterally, and moved around in this region to obtain the highest MEP recording to locate the mylohyoid cortical area of hemisphere (Hamdy et al., 1996). The location yielding the highest MEP recording was termed “hot spot,” and we delivered magnetic stimulation to that point. Then, single-pulse TMS was delivered to the “hot spot,” decreasing in steps of 2% of the stimulator output. |
| <b>9</b>  | Modifications of intervention during study     | There was no modification to the intervention described in the study                                                                                                                                                                                                                                                                                                                                                                                                                                                                                                                                                                                                                            |
| <b>10</b> | Planned adherence assessment                   | No assessment of intervention adherence was detailed in study                                                                                                                                                                                                                                                                                                                                                                                                                                                                                                                                                                                                                                   |

|           |                  |                                                                                         |
|-----------|------------------|-----------------------------------------------------------------------------------------|
| <b>11</b> | Actual adherence | All completed intervention but 2/ 28 were lost to follow up analysis post intervention. |
|-----------|------------------|-----------------------------------------------------------------------------------------|

Dziewas et al 2018 <sup>[31]</sup>

| <b>TIDieR item number</b> | <b>Item descriptor</b>                         | <b>Item</b>                                                                                                                                                                                                                                                                                                                                                                                                                                                                                                                                                                                                                                                                                                                                  |
|---------------------------|------------------------------------------------|----------------------------------------------------------------------------------------------------------------------------------------------------------------------------------------------------------------------------------------------------------------------------------------------------------------------------------------------------------------------------------------------------------------------------------------------------------------------------------------------------------------------------------------------------------------------------------------------------------------------------------------------------------------------------------------------------------------------------------------------|
| <b>1</b>                  | Brief name                                     | Pharyngeal electrical stimulation (PES).                                                                                                                                                                                                                                                                                                                                                                                                                                                                                                                                                                                                                                                                                                     |
| <b>2</b>                  | Why                                            | PES is a novel technique shown to enhance reorganisation of the swallow-related motor cortex, to facilitate activation of corticobulbar pathways, and to increase salivary levels of substance P (a neurotransmitter involved in the control of swallowing).                                                                                                                                                                                                                                                                                                                                                                                                                                                                                 |
| <b>3</b>                  | What materials and procedures                  | For the study intervention (PES), we used a commercial device (Phagenyx, Phagenesis Ltd, Manchester, UK), which comprises a nasogastric feeding catheter that houses stimulation ring-electrodes and a computerised base station that delivers stimulation in the range 1–50 mA at 5 Hz. In all patients, the stimulation catheter was placed before randomisation. The catheter was inserted via the nose to an aboral depth related to the patient’s height so that the pair of treatment ring electrodes located on the outer surface of the catheter were adjacent to the pharynx. A coloured zone on the outer catheter surface and visible at the nares also aided correct placement and easy confirmation of correct electrode depth. |
| <b>4</b>                  | Expertise / training of intervention providers | This information was not provided in this study                                                                                                                                                                                                                                                                                                                                                                                                                                                                                                                                                                                                                                                                                              |
| <b>5</b>                  | Mode of delivery                               | Face to face on an individual level.                                                                                                                                                                                                                                                                                                                                                                                                                                                                                                                                                                                                                                                                                                         |
| <b>6</b>                  | Where                                          | Neurological intensive care unit, Germany.                                                                                                                                                                                                                                                                                                                                                                                                                                                                                                                                                                                                                                                                                                   |
| <b>7</b>                  | When and how much                              | In all patients, PES or sham stimulation was given on three consecutive days for 10 min each day                                                                                                                                                                                                                                                                                                                                                                                                                                                                                                                                                                                                                                             |
| <b>8</b>                  | Tailoring of the intervention                  | The current intensity (mA) at which PES treatment was delivered was individually adjusted and optimised at every session by the health-care worker interacting with the touchscreen on the base station in response to patient responses. This treatment optimisation procedure involved increasing the current intensity incrementally from 1 mA to                                                                                                                                                                                                                                                                                                                                                                                         |

|           |                                            |                                                                                                                                                                                                                                                                                                                                                                                                                               |
|-----------|--------------------------------------------|-------------------------------------------------------------------------------------------------------------------------------------------------------------------------------------------------------------------------------------------------------------------------------------------------------------------------------------------------------------------------------------------------------------------------------|
|           |                                            | detect the perceptual threshold (i.e. patient first aware of stimulation) and then to the maximum tolerated threshold (i.e. patient no longer wants the current to be increased further) intensity levels three-times each. Thereafter, the optimal treatment intensity was automatically calculated by the base station with the use of average values of the three trials according to the formula $PT+0.75 \times (MTT-PT$ |
| <b>9</b>  | Modifications of intervention during study | The intervention was not modified and this was not clearly stated in study                                                                                                                                                                                                                                                                                                                                                    |
| <b>10</b> | Planned adherence assessment               | It was not clearly stated in study that adherence assessment was planned or strategies used to maintain fidelity.                                                                                                                                                                                                                                                                                                             |
| <b>11</b> | Actual adherence                           | 100% adherence to PES as evidenced by full number of patients analysed for primary outcome.                                                                                                                                                                                                                                                                                                                                   |

Guillan-Sola et al 2017 <sup>[32]</sup> (Respiratory Muscle Strength Training)

| <b>TIDieR item number</b> | <b>Item descriptor</b> | <b>Item</b>                                                                                                                                                                                                                                                                                                                                                                                                                                                                                                                                                                                                                                                                                                                                                                                                                                                                                                                                                                                                         |
|---------------------------|------------------------|---------------------------------------------------------------------------------------------------------------------------------------------------------------------------------------------------------------------------------------------------------------------------------------------------------------------------------------------------------------------------------------------------------------------------------------------------------------------------------------------------------------------------------------------------------------------------------------------------------------------------------------------------------------------------------------------------------------------------------------------------------------------------------------------------------------------------------------------------------------------------------------------------------------------------------------------------------------------------------------------------------------------|
| <b>1</b>                  | Brief name             | This intervention, aimed at strengthening respiratory muscles, might improve cough effectiveness and reduce aspiration risk.                                                                                                                                                                                                                                                                                                                                                                                                                                                                                                                                                                                                                                                                                                                                                                                                                                                                                        |
| <b>2</b>                  | Why                    | Respiratory muscle training is another therapeutic strategy to be considered in patients with dys-phagia. As impaired cough function in stroke is related to respiratory muscle weakness, <sup>8</sup> an intervention aimed to strengthen respiratory muscles might improve cough effectiveness and reduce aspiration risk. Two randomized clinical trials demonstrated significant improvement in inspiratory muscle strength and other physiologic parameters after inspiratory muscle training. <sup>9,10</sup> Some studies have suggested that expiratory muscle strength training can improve respiratory function in patients with Parkinson disease, and also improve swallow-ing function and avoid chest infections. a randomized controlled trial was designed to assess the therapeutic effectiveness of neuromuscular electrical stimulation and of inspiratory and expiratory muscle training in dysphagic subacute stroke patients, compared to standard swallow therapy. A second objective was to |

|           |                                                |                                                                                                                                                                                                                                                                                                                                                                                                                                                                                                |
|-----------|------------------------------------------------|------------------------------------------------------------------------------------------------------------------------------------------------------------------------------------------------------------------------------------------------------------------------------------------------------------------------------------------------------------------------------------------------------------------------------------------------------------------------------------------------|
|           |                                                | evaluate their potential influence on the occurrence of respiratory complications at 3-month follow-up                                                                                                                                                                                                                                                                                                                                                                                         |
| <b>3</b>  | What materials and procedures                  | All three groups received standard swallow therapy, which consisted of an educational intervention aimed to improve self-management of dysphagia and protect the airway, oral exercises to improve lingual praxis, and compensatory techniques based on videofluoroscopic findings. These swallowing manoeuvres, oral exercises, and compensatory techniques were individualized according to intrinsic patient characteristics. Additionally, Group II received respiratory training sessions |
| <b>4</b>  | Expertise / training of intervention providers | Speech and Language Therapist. No details of expertise or specific training were given in study.                                                                                                                                                                                                                                                                                                                                                                                               |
| <b>5</b>  | Mode of delivery                               | Face to face and on an individual basis                                                                                                                                                                                                                                                                                                                                                                                                                                                        |
| <b>6</b>  | Where                                          | Acute stroke unit in acute hospital                                                                                                                                                                                                                                                                                                                                                                                                                                                            |
| <b>7</b>  | When and how much                              | 5 sets of 10 respirations followed by 1 minute of unloaded recovery breathing off the device (Orygen Dual Valve®, Forumed SL, Barcelona, Catalonia, Spain), 18 twice a day, 5 days per week for 3 weeks, with the assistance of a therapist. Patients in this group also received 1 hour a day of standard swallowing therapy as detailed in procedures section, five days a week for 3 weeks.                                                                                                 |
| <b>8</b>  | Tailoring of the intervention                  | Training loads were set at a pressure equivalent to 30% of maximal inspiratory and expiratory pressures and increased weekly at intervals of 10 cmH <sub>2</sub> O                                                                                                                                                                                                                                                                                                                             |
| <b>9</b>  | Modifications of intervention during study     | Intervention was not modified                                                                                                                                                                                                                                                                                                                                                                                                                                                                  |
| <b>10</b> | Planned adherence assessment                   | No planned assessment of adherence was described in study                                                                                                                                                                                                                                                                                                                                                                                                                                      |
| <b>11</b> | Actual adherence                               | 16 of the 20 patients randomised to this group completed full intervention protocol                                                                                                                                                                                                                                                                                                                                                                                                            |

| <b>TIDieR item number</b> | <b>Item descriptor</b>                         | <b>Item</b>                                                                                                                                                                                                                                                                                                                                                                                                                                                                                                                                                                                                                                                                                              |
|---------------------------|------------------------------------------------|----------------------------------------------------------------------------------------------------------------------------------------------------------------------------------------------------------------------------------------------------------------------------------------------------------------------------------------------------------------------------------------------------------------------------------------------------------------------------------------------------------------------------------------------------------------------------------------------------------------------------------------------------------------------------------------------------------|
| <b>1</b>                  | Brief name                                     | Neuromuscular electrical stimulation using the Intelect VitalStim device (VitalStim®, Chattanooga Group, Hixson, TN, USA).                                                                                                                                                                                                                                                                                                                                                                                                                                                                                                                                                                               |
| <b>2</b>                  | Why                                            | Neuromuscular electrical stimulation aims to improve the strength of muscle groups that were disabled by stroke but preserved motor innervation. The available studies observed contradictory results, with some authors reporting that sensory and motor stimulation of peripheral nerves can accelerate swallowing recovery                                                                                                                                                                                                                                                                                                                                                                            |
| <b>3</b>                  | What materials and procedures                  | All three groups received standard swallow therapy, which consisted of an educational intervention aimed to improve self-management of dysphagia and protect the airway, oral exercises to improve lingual praxis, and compensatory techniques based on videofluoroscopic findings. These swallowing manoeuvres, oral exercises, and compensatory techniques were individualized according to intrinsic patient characteristics. In addition to standard swallow therapy, Group III received sham respiratory muscle training, with the workloads fixed at 10 cmH <sub>2</sub> O throughout the 3-week-intervention period, and neuromuscular electrical stimulation using the Intelect VitalStim device |
| <b>4</b>                  | Expertise / training of intervention providers | Speech and Language Therapist. No details of expertise or specific training were given in study.                                                                                                                                                                                                                                                                                                                                                                                                                                                                                                                                                                                                         |
| <b>5</b>                  | Mode of delivery                               | Face to face and on an individual basis                                                                                                                                                                                                                                                                                                                                                                                                                                                                                                                                                                                                                                                                  |
| <b>6</b>                  | Where                                          | Acute stroke unit, acute hospital ward.                                                                                                                                                                                                                                                                                                                                                                                                                                                                                                                                                                                                                                                                  |
| <b>7</b>                  | When and how much                              | Under supervision by a speech-lan-guage therapist, two electrodes were placed on suprahyoid muscles in 40-minute daily sessions (5 days per week for 3 weeks) and 80 Hz of transcuta-neous electrical stimulus was applied, according to VitalStim® instructions; patients were instructed to swallow when they felt muscle contraction. Patients in this group also received 1 hour a day of standard swallowing therapy as detailed in procedures section, five days a week for 3 weeks.                                                                                                                                                                                                               |
| <b>8</b>                  | Tailoring of the intervention                  | No intervention adaptation or description of same in this study                                                                                                                                                                                                                                                                                                                                                                                                                                                                                                                                                                                                                                          |

|           |                                            |                                                                                           |
|-----------|--------------------------------------------|-------------------------------------------------------------------------------------------|
|           |                                            |                                                                                           |
| <b>9</b>  | Modifications of intervention during study | Intervention was not modified                                                             |
| <b>10</b> | Planned adherence assessment               | No planned assessment of adherence was described in study                                 |
| <b>11</b> | Actual adherence                           | 19/21 patients randomised to this experimental group completed full intervention protocol |

Huang et al 2014 <sup>[33]</sup>

| <b>TIDieR item number</b> | <b>Item descriptor</b>                         | <b>Item</b>                                                                                                                                                                                                                                                                                                                                                                                                                                                                                                                                                                                                         |
|---------------------------|------------------------------------------------|---------------------------------------------------------------------------------------------------------------------------------------------------------------------------------------------------------------------------------------------------------------------------------------------------------------------------------------------------------------------------------------------------------------------------------------------------------------------------------------------------------------------------------------------------------------------------------------------------------------------|
| <b>1</b>                  | Brief name                                     | Neuromuscular electrical stimulation using the Intelect VitalStim device (VitalStim®, Chattanooga Group, Hixson, TN, USA).                                                                                                                                                                                                                                                                                                                                                                                                                                                                                          |
| <b>2</b>                  | Why                                            | This therapy bypasses the injured central swallowing circuitries such as stroke and delivers an electrical current via electrodes that are placed on the neck muscles to create a contraction of the swallowing muscles.                                                                                                                                                                                                                                                                                                                                                                                            |
| <b>3</b>                  | What materials and procedures                  | Each patient's anterior neck skin was cleaned using an alcohol swab to remove sub-stances that might interfere with the electrode contact, and the 2 sets of electrodes were placed on the patients' anterior neck. The placement of the dual-channel electrodes was located in 1 vertical line with channel 1 above the thyroid notch and channel 2 below the thyroid notch. The VitalStim therapeutic device, which consists of a dual channel with 2 bipolar electrodes for each channel. The parameters of electrical stimulator are a pulse width of 700ms, frequency of 80 Hz, and wave amplitude of 0-25 mA. |
| <b>4</b>                  | Expertise / training of intervention providers | A licensed physiatrist with 10 years of clinical experience and certified training in using the VitalStim electrical stimulator administered the NMES.                                                                                                                                                                                                                                                                                                                                                                                                                                                              |
| <b>5</b>                  | Mode of delivery                               | Face to face and on an individual basis is assumed as no group therapy is stated.                                                                                                                                                                                                                                                                                                                                                                                                                                                                                                                                   |
| <b>6</b>                  | Where                                          | Acute hospital ward                                                                                                                                                                                                                                                                                                                                                                                                                                                                                                                                                                                                 |



|           |                                            |                                                                                                                                                                                                                                                                                                                                                                                                                          |
|-----------|--------------------------------------------|--------------------------------------------------------------------------------------------------------------------------------------------------------------------------------------------------------------------------------------------------------------------------------------------------------------------------------------------------------------------------------------------------------------------------|
| <b>7</b>  | When and how much                          | Patients were treated 3 times per week (60 minutes per session), and 10 sessions of NMES were performed per patient.                                                                                                                                                                                                                                                                                                     |
| <b>8</b>  | Tailoring of the intervention              | The wave amplitude of the treatment was set according to the patient's tolerance level, and it gradually increased in a stepwise increment of .5 mA from 0 mA until the patient felt a tingling sensation on the neck and a muscle contraction. The tolerance wave amplitude was different among individuals. The current intensity of the electrical stimulation was determined and fixed during the treatment session. |
| <b>9</b>  | Modifications of intervention during study | No modification stated in this study                                                                                                                                                                                                                                                                                                                                                                                     |
| <b>10</b> | Planned adherence assessment               | This study did not state a planned assessment of adherence was in place                                                                                                                                                                                                                                                                                                                                                  |
| <b>11</b> | Actual adherence                           | 100% adherence assumed as all participants completed intervention and were included in final analysis                                                                                                                                                                                                                                                                                                                    |

Hwang et al 2007 <sup>[34]</sup>

| <b>TIDieR item number</b> | <b>Item descriptor</b>        | <b>Item</b>                                                                                                                                                                                                                                                                                           |
|---------------------------|-------------------------------|-------------------------------------------------------------------------------------------------------------------------------------------------------------------------------------------------------------------------------------------------------------------------------------------------------|
| <b>1</b>                  | Brief name                    | Pre-emptive swallowing stimulation consisted of thermal tactile stimulation, oral stimulation, oral massage, digital manipulation and a cervical range of motion exercise                                                                                                                             |
| <b>2</b>                  | Why                           | Regular pre-emptive swallowing stimulation could potentially prevent or decrease loss of proprioception, muscle atrophy and changes of mechanoreceptors or chemoreceptors in the oropharynx, thus assisting in the recovery of swallowing function following extubation.                              |
| <b>3</b>                  | What materials and procedures | Thermal tactile stimulation<br>1) Chill laryngoscope<br>2) Open patient's mouth wide and stroke the right side of the anterior palatal arch five times with the laryngoscope<br>3) Similarly, stroke the left side of the anterior palatal arch five times with the laryngoscope.<br>Oral stimulation |

|           |                                                |                                                                                                                                                                                                                                                                                                                                                                                                                                                                                                                                                                                                                                                                                                                                                                                                                                                                                                                                                                                                                                                                                                                                              |
|-----------|------------------------------------------------|----------------------------------------------------------------------------------------------------------------------------------------------------------------------------------------------------------------------------------------------------------------------------------------------------------------------------------------------------------------------------------------------------------------------------------------------------------------------------------------------------------------------------------------------------------------------------------------------------------------------------------------------------------------------------------------------------------------------------------------------------------------------------------------------------------------------------------------------------------------------------------------------------------------------------------------------------------------------------------------------------------------------------------------------------------------------------------------------------------------------------------------------|
|           |                                                | <p>1) Stimulate the tongue gently with a gauze or brush 2) Stroke the middle and both sides of the tongue 3) Stroke the roof of the oral cavity gently 4) Repeat for 1 minute.</p> <p>Oral massage</p> <p>1) After donning gloves, place the second finger into the oral cavity, with the thumb outside 2) Massage both lips with traction 3) Massage both cheeks similarly 4) Repeat for 1 minute.</p> <p>Digital manipulation</p> <p>1) Place the thumb and second finger around the thyroid 2) Stroke the upper portion of hyoid bone to below the thyroid cartilage up and down forcefully 3) Repeat five times 4) Stroke the muscles around neck downward 10 times.</p> <p>Cervical range of motion exercise</p> <p>1) Flex the neck of the patient toward the chest and then extend the neck 2) Bend the neck of the patient to the right side until the patient's ear is in contact with the shoulder 3) Repeat on the left side 4) Rotate the neck of the patient to fully to the right and then to the left 5) Open the patient's mouth as wide as possible and massage the tympanomandibular joints 6) Repeat this five times.</p> |
| <b>4</b>  | Expertise / training of intervention providers | Only one occupational therapist performed the pre-emptive swallowing stimulation.                                                                                                                                                                                                                                                                                                                                                                                                                                                                                                                                                                                                                                                                                                                                                                                                                                                                                                                                                                                                                                                            |
| <b>5</b>  | Mode of delivery                               | Face to face at patient's bedside                                                                                                                                                                                                                                                                                                                                                                                                                                                                                                                                                                                                                                                                                                                                                                                                                                                                                                                                                                                                                                                                                                            |
| <b>6</b>  | Where                                          | In general medical / surgical intensive care unit                                                                                                                                                                                                                                                                                                                                                                                                                                                                                                                                                                                                                                                                                                                                                                                                                                                                                                                                                                                                                                                                                            |
| <b>7</b>  | When and how much                              | Patients in the experimental group received this pre-emptive swallowing stimulation for 15 minutes twice daily, six days per week, in a semi-supine position with the back rest at 30-45 degrees from the third day after intubation until video-fluoroscopy.                                                                                                                                                                                                                                                                                                                                                                                                                                                                                                                                                                                                                                                                                                                                                                                                                                                                                |
| <b>8</b>  | Tailoring of the intervention                  | Not stated in the study                                                                                                                                                                                                                                                                                                                                                                                                                                                                                                                                                                                                                                                                                                                                                                                                                                                                                                                                                                                                                                                                                                                      |
| <b>9</b>  | Modifications of intervention during study     | Not stated in the study                                                                                                                                                                                                                                                                                                                                                                                                                                                                                                                                                                                                                                                                                                                                                                                                                                                                                                                                                                                                                                                                                                                      |
| <b>10</b> | Planned adherence assessment                   | Not stated in the study                                                                                                                                                                                                                                                                                                                                                                                                                                                                                                                                                                                                                                                                                                                                                                                                                                                                                                                                                                                                                                                                                                                      |
| <b>11</b> | Actual adherence                               | All participants completed intervention.                                                                                                                                                                                                                                                                                                                                                                                                                                                                                                                                                                                                                                                                                                                                                                                                                                                                                                                                                                                                                                                                                                     |

| <b>TIDieR item number</b> | <b>Item descriptor</b>                         | <b>Item</b>                                                                                                                                                                                                                                                                                                                                                                                                                                                                                                                                                                                                                                                                                                                                                                                                                                                                              |
|---------------------------|------------------------------------------------|------------------------------------------------------------------------------------------------------------------------------------------------------------------------------------------------------------------------------------------------------------------------------------------------------------------------------------------------------------------------------------------------------------------------------------------------------------------------------------------------------------------------------------------------------------------------------------------------------------------------------------------------------------------------------------------------------------------------------------------------------------------------------------------------------------------------------------------------------------------------------------------|
| <b>1</b>                  | Brief name                                     | Pharyngeal electrical stimulation                                                                                                                                                                                                                                                                                                                                                                                                                                                                                                                                                                                                                                                                                                                                                                                                                                                        |
| <b>2</b>                  | Why                                            | It has been shown that pharyngeal electrical stimulation (PES) using swallowed intraluminal electrodes can enhance the excitability and organization of human pharyngeal motor cortex                                                                                                                                                                                                                                                                                                                                                                                                                                                                                                                                                                                                                                                                                                    |
| <b>3</b>                  | What materials and procedures                  | Sub-jects swallowed a 3.2-mm–diameter intraluminal catheter (Gaeltec, Ltd, Dunvegan, Isle of Skye, UK), either trans-nasally or transorally, depending on their preference. The catheter housed a pair of bipolar platinum ring electrodes, approximately 1 cm apart in a rostrocaudal orientation, that were positioned in the pharynx. The pharyngeal catheter also was used to deliver electrical stimulation. Electrical stimulation of the pharynx was performed using the pharyngeal electromyography catheter described previously, which was connected to an electrical stimulator (model DS7; Digitimer, Ltd, Welwyn–Garden City, Herts, UK) via a trigger generator (Digitimer model DL2). Pharyngeal electrical stimuli (0.2-ms pulses, 280 V) was delivered at a set frequency (5 Hz), intensity (75% of maximal tolerated), and duration (10 minutes) as reported by Fraser |
| <b>4</b>                  | Expertise / training of intervention providers | This was not included in this stud                                                                                                                                                                                                                                                                                                                                                                                                                                                                                                                                                                                                                                                                                                                                                                                                                                                       |
| <b>5</b>                  | Mode of delivery                               | Face to face and on individual basis assumed as this intervention has been delivered at patient's bedside in other PES studies but not clearly stated in study.                                                                                                                                                                                                                                                                                                                                                                                                                                                                                                                                                                                                                                                                                                                          |
| <b>6</b>                  | Where                                          | Acute stroke unit, acute hospital setting.                                                                                                                                                                                                                                                                                                                                                                                                                                                                                                                                                                                                                                                                                                                                                                                                                                               |
| <b>7</b>                  | When and how much                              | Within 24 hours after videofluoroscopy, subjects in the active group received bedside PES once daily for 3 consecutive days                                                                                                                                                                                                                                                                                                                                                                                                                                                                                                                                                                                                                                                                                                                                                              |
| <b>8</b>                  | Tailoring of the intervention                  | The maximum tolerated PES intensity was predetermined from each participant's first perceived sensation and pain threshold (the point when the pharyngeal sensation became uncomfortable), which were calculated from an average of 3 trials.                                                                                                                                                                                                                                                                                                                                                                                                                                                                                                                                                                                                                                            |

|           |                                            |                                                                                      |
|-----------|--------------------------------------------|--------------------------------------------------------------------------------------|
| <b>9</b>  | Modifications of intervention during study | No modification of intervention stated in study.                                     |
| <b>10</b> | Planned adherence assessment               | Planned adherence assessment not completed in this study                             |
| <b>11</b> | Actual adherence                           | 16/17 randomised participants completed intervention and post intervention analysis. |

Kumar et al 2011<sup>[36]</sup>

| <b>TIDieR item number</b> | <b>Item descriptor</b>        | <b>Item</b>                                                                                                                                                                                                                                                                                                                                                                                                                                                                                                                                                                                                                                                                                                                                                                                                                                                                                                                                                                                                                                                                                                 |
|---------------------------|-------------------------------|-------------------------------------------------------------------------------------------------------------------------------------------------------------------------------------------------------------------------------------------------------------------------------------------------------------------------------------------------------------------------------------------------------------------------------------------------------------------------------------------------------------------------------------------------------------------------------------------------------------------------------------------------------------------------------------------------------------------------------------------------------------------------------------------------------------------------------------------------------------------------------------------------------------------------------------------------------------------------------------------------------------------------------------------------------------------------------------------------------------|
| <b>1</b>                  | Brief name                    | Transcranial direct current stimulation (TDCS).                                                                                                                                                                                                                                                                                                                                                                                                                                                                                                                                                                                                                                                                                                                                                                                                                                                                                                                                                                                                                                                             |
| <b>2</b>                  | Why                           | TDCS is a non invasive brain stimulation technique that utilizes weak direct current to produce shifts in neuronal excitability and can be combined with swallowing exercises. It has been shown to improve motor functions in chronic stroke patients. More recently, investigators have shown that application of anodal tDCS to the pharyngeal motor cortex in healthy human subjects increases pharyngeal excitability in an intensity-dependent manner.                                                                                                                                                                                                                                                                                                                                                                                                                                                                                                                                                                                                                                                |
| <b>3</b>                  | What materials and procedures | Using the international 10- to 20-EEG electrode system for guidance, a saline-soaked anodal electrode was placed over the undamaged hemisphere, mid-distance between C3 and T3 on the left or C4 and T4 on the right, with a reference electrode over the contralateral supraorbital region. This montage was expected to generate maximal current density over the inferior sensorimotor cortex and the neighbouring premotor brain regions critical for reorganization of the swallowing motor cortex. We confirmed the location of the stimulating electrode and its proximity to the targeted regions by co-registering it with high-resolution T1-weighted MRI scans. A DOSS score was obtained immediately before stimulation sessions (DOSS-pre) and after the fifth session (DOSS-post). The tDCS/sham was applied in conjunction with standardized swallowing maneuvers to provide adequate sensory and motor activation of the swallowing cortex. All participants sucked on a lemon-flavored lollipop during these sessions. Patients reporting dryness of mouth were provided with 1 to 2 small |

|           |                                                |                                                                                                                                                                                                                                                                                                                                                                                                                        |
|-----------|------------------------------------------------|------------------------------------------------------------------------------------------------------------------------------------------------------------------------------------------------------------------------------------------------------------------------------------------------------------------------------------------------------------------------------------------------------------------------|
|           |                                                | ice chips intermittently. Patients were instructed to “swallow hard” every 30 seconds, thereby generating approximately 60 effortful swallows during each session. We used gesticulations to encourage aphasic patients to swallow at regular intervals. Occurrence of a swallow response was assessed by observing the movement of the thyroid cartilage or by palpating its excursion in patients with thicker necks |
| <b>4</b>  | Expertise / training of intervention providers | Not clearly stated in study                                                                                                                                                                                                                                                                                                                                                                                            |
| <b>5</b>  | Mode of delivery                               | Face to face on an individual basis                                                                                                                                                                                                                                                                                                                                                                                    |
| <b>6</b>  | Where                                          | Acute hospital setting.                                                                                                                                                                                                                                                                                                                                                                                                |
| <b>7</b>  | When and how much                              | tDCS (2 mA for 30 minutes) was applied daily to the non lesional hemisphere for 5 consecutive days. The tDCS was delivered through a battery-driven constant current stimulator (Phoresor; Iomed, Salt Lake City, UT), with the following electrode dimensions: 35 cm for the anode and 56 cm for the reference electrode.                                                                                             |
| <b>8</b>  | Tailoring of the intervention                  | Intervention was not adapted                                                                                                                                                                                                                                                                                                                                                                                           |
| <b>9</b>  | Modifications of intervention during study     | Intervention was not modified                                                                                                                                                                                                                                                                                                                                                                                          |
| <b>10</b> | Planned adherence assessment                   | Adherence was assessed and was 100%                                                                                                                                                                                                                                                                                                                                                                                    |
| <b>11</b> | Actual adherence                               | 100% adherence with the intervention was recorded                                                                                                                                                                                                                                                                                                                                                                      |

Li et al 2018 <sup>[37]</sup>

| <b>TIDieR item number</b> | <b>Item descriptor</b>        | <b>Item</b>                                                                                                                                                                                             |
|---------------------------|-------------------------------|---------------------------------------------------------------------------------------------------------------------------------------------------------------------------------------------------------|
| <b>1</b>                  | Brief name                    | Vital stim, (Neuromuscular electrical stimulation), Chattanooga Group, Hixson, Tennessee, USA.                                                                                                          |
| <b>2</b>                  | Why                           | Electrical stimulation has been reported as a treatment for pharyngeal dysphagia. It uses surface electrodes to contract local muscles by delivering electrical stimulation to depolarise nerve fibres. |
| <b>3</b>                  | What materials and procedures | The skin of the anterior neck was cleaned with 70% isopropyl alcohol cotton. Two sets of                                                                                                                |

|          |                                                |                                                                                                                                                                                                                                                                                                                                                                                                                                                                                                                                                                                                                                                                                                                                                                                                                                                                                                                                                                                                                                                                                                                                                                                                                                                                                                                                                                    |
|----------|------------------------------------------------|--------------------------------------------------------------------------------------------------------------------------------------------------------------------------------------------------------------------------------------------------------------------------------------------------------------------------------------------------------------------------------------------------------------------------------------------------------------------------------------------------------------------------------------------------------------------------------------------------------------------------------------------------------------------------------------------------------------------------------------------------------------------------------------------------------------------------------------------------------------------------------------------------------------------------------------------------------------------------------------------------------------------------------------------------------------------------------------------------------------------------------------------------------------------------------------------------------------------------------------------------------------------------------------------------------------------------------------------------------------------|
|          |                                                | <p>electrodes were used. The top set was placed in the submental region between the anterior belly of the digastric muscle and the hyoid bone, and the hyoid bone and thyroid cartilage. The bottom set was placed on the skin between the thyroid cartilage and cricoid cartilage and below the cricoid cartilage. We stimulated the muscles responsible for swallowing, such as the digastric muscle, mylohyoid and thyrohyoid. NMES carries possible risks, including laryngospasm, arrhythmia, hypotension, glottic closure and burns. We explained the possible adverse effects to the patients before treatment and we closely observed and recorded every treatment session. The vital stim device cycles automatically from 'on' to 'off' to 'on' again for 1 second every minute. Because the change in stimulation is ramped, this cycling process takes up to 4 seconds, the therapy sessions they were not swallowing. The traditional swallowing therapy included basic training and direct food intake training. The basic training referred to indirect training of organs related to food intake and swallowing. Direct food intake training involved several aspects including food intake environment, body posture for swallowing and remove of pharyngeal food residue. Direct food intake training was used primarily for mild dysphagia.</p> |
| <b>4</b> | Expertise / training of intervention providers | Vital stim therapy was delivered by an occupational therapist. The expertise or details of specific training were not provided in this study.                                                                                                                                                                                                                                                                                                                                                                                                                                                                                                                                                                                                                                                                                                                                                                                                                                                                                                                                                                                                                                                                                                                                                                                                                      |
| <b>5</b> | Mode of delivery                               | Face to face and on an individual basis.                                                                                                                                                                                                                                                                                                                                                                                                                                                                                                                                                                                                                                                                                                                                                                                                                                                                                                                                                                                                                                                                                                                                                                                                                                                                                                                           |
| <b>6</b> | Where                                          | Patient's bedside in acute hospital ward                                                                                                                                                                                                                                                                                                                                                                                                                                                                                                                                                                                                                                                                                                                                                                                                                                                                                                                                                                                                                                                                                                                                                                                                                                                                                                                           |
| <b>7</b> | When and how much                              | Therapy sessions were 1 hour long, delivered daily x 5 per week x 4 weeks                                                                                                                                                                                                                                                                                                                                                                                                                                                                                                                                                                                                                                                                                                                                                                                                                                                                                                                                                                                                                                                                                                                                                                                                                                                                                          |
| <b>8</b> | Tailoring of the intervention                  | A sensory threshold for each participant had to be identified. Amplitude of the electrical current level was approx 7 mili Amps                                                                                                                                                                                                                                                                                                                                                                                                                                                                                                                                                                                                                                                                                                                                                                                                                                                                                                                                                                                                                                                                                                                                                                                                                                    |

|           |                                            |                                                                               |
|-----------|--------------------------------------------|-------------------------------------------------------------------------------|
| <b>9</b>  | Modifications of intervention during study | No modification of the intervention detailed in this study                    |
| <b>10</b> | Planned adherence assessment               | Study did not state that an assessment of intervention adherence was planned. |
| <b>11</b> | Actual adherence                           | 38/45 completed intervention and completed post treatment assessments.        |

Moon et al 2017 <sup>[38]</sup>

| <b>TIDieR item number</b> | <b>Item descriptor</b>                         | <b>Item</b>                                                                                                                                                                                                                                                                                                                                                                                                                                                                                                                                                                                                                               |
|---------------------------|------------------------------------------------|-------------------------------------------------------------------------------------------------------------------------------------------------------------------------------------------------------------------------------------------------------------------------------------------------------------------------------------------------------------------------------------------------------------------------------------------------------------------------------------------------------------------------------------------------------------------------------------------------------------------------------------------|
| <b>1</b>                  | Brief name                                     | Expiratory muscle strength training (EMST)                                                                                                                                                                                                                                                                                                                                                                                                                                                                                                                                                                                                |
| <b>2</b>                  | Why                                            | Although EMST is a potential remedial approach for swallowing disorder, it has only been investigated in the elderly and in patients with Parkinson's disease and Huntington's disease. Therefore, in this study, acute stroke patients with dysphagia were monitored and examined to determine the effects of EMST.                                                                                                                                                                                                                                                                                                                      |
| <b>3</b>                  | What materials and procedures                  | The experimental group was trained using the EMST 150 (Aspire Products LLC., USA). First, patients were provided with a mouthpiece to blow into, after which the nasal cavity was closed using forceps. The personal maximal expiratory pressure (MEP) was then measured using a manometer. A threshold value of 70%, it based on the personal MEP. The training consisted of taking a deep breath and biting a mouthpiece, during which time the patient was told to blow faster and stronger. Each patient received seven trainings per session, five times a week for four weeks. Breaks of 30 seconds were provided after one session |
| <b>4</b>                  | Expertise / training of intervention providers | All swallowing treatments were carried out by the responsible therapists (Occupational therapists). No further information on expertise, background or specific training.                                                                                                                                                                                                                                                                                                                                                                                                                                                                 |
| <b>5</b>                  | Mode of delivery                               | Face to face and on an individual basis                                                                                                                                                                                                                                                                                                                                                                                                                                                                                                                                                                                                   |
| <b>6</b>                  | Where                                          | Acute hospital setting                                                                                                                                                                                                                                                                                                                                                                                                                                                                                                                                                                                                                    |
| <b>7</b>                  | When and how much                              | All participants performed traditional swallowing rehabilitation therapy in 30 minute sessions five times a week for four weeks. Expiratory muscle strength training was only provided to the experimental group in 30 minute                                                                                                                                                                                                                                                                                                                                                                                                             |

|           |                                            |                                                                                                                                                                                                                                                              |
|-----------|--------------------------------------------|--------------------------------------------------------------------------------------------------------------------------------------------------------------------------------------------------------------------------------------------------------------|
|           |                                            | sessions. Traditional swallowing treatment was composed of orofacial exercises, thermal-tactile stimulation, the Mendelson maneuver, effortful swallow, and supraglottic maneuver. All swallowing treatments were carried out by the responsible therapists. |
| <b>8</b>  | Tailoring of the intervention              | The personal maximal expiratory pressure (MEP) was then measured using a manometer. Wheeler et al. were trained with a threshold value of 70%, it based on the personal MEP11).                                                                              |
| <b>9</b>  | Modifications of intervention during study | The intervention was not modified during this study                                                                                                                                                                                                          |
| <b>10</b> | Planned adherence assessment               | Adherence was not formally assessed or this assessment documented in study.                                                                                                                                                                                  |
| <b>11</b> | Actual adherence                           | 100% of all patients in both groups completed treatments as per information in results section.                                                                                                                                                              |

Moon et al 2018 <sup>[39]</sup>

| <b>TIDieR item number</b> | <b>Item descriptor</b>        | <b>Item</b>                                                                                                                                                                                                                                                                                                                                                                                                                                                                                                                                                                                                                                                                                                                                                                               |
|---------------------------|-------------------------------|-------------------------------------------------------------------------------------------------------------------------------------------------------------------------------------------------------------------------------------------------------------------------------------------------------------------------------------------------------------------------------------------------------------------------------------------------------------------------------------------------------------------------------------------------------------------------------------------------------------------------------------------------------------------------------------------------------------------------------------------------------------------------------------------|
| <b>1</b>                  | Brief name                    | Tongue palate resistance training using an Iowa Oral Performance Instrument.                                                                                                                                                                                                                                                                                                                                                                                                                                                                                                                                                                                                                                                                                                              |
| <b>2</b>                  | Why                           | Tongue strength training has been shown to be more effective when it is accompanied by accuracy training compared with tongue strength training alone. Tongue pressure strength and accuracy training (TPSAT) improves not only tongue strength but also bolus control within the mouth. The tongue and its pressure generate intraoral cavity pressure that transports the bolus from the oral cavity to the pharynx, affecting the oral transit time during the swallowing process. According to previous research, an increase in the tongue–palate pressure during swallowing enhances the generation of pharyngeal pressures. Considering these aspects, the generation of tongue–palate pressure may play an important role in the establishment of the overall swallowing strength |
| <b>3</b>                  | What materials and procedures | The traditional dysphagia therapy consisted of thermal tactile stimulation, the Mendelsohn maneuver, effortful                                                                                                                                                                                                                                                                                                                                                                                                                                                                                                                                                                                                                                                                            |



|           |                                                |                                                                                                                                                                                                                                                                                                                                                                                                                                                                                                                                                                     |
|-----------|------------------------------------------------|---------------------------------------------------------------------------------------------------------------------------------------------------------------------------------------------------------------------------------------------------------------------------------------------------------------------------------------------------------------------------------------------------------------------------------------------------------------------------------------------------------------------------------------------------------------------|
|           |                                                | swallow, and diet modification. PSAT consisted of an anterior and posterior isometric tongue strength exercise and an isometric tongue accuracy exercise. For the anterior isometric tongue strength exercise, participants were instructed to use the tongue tip to press on the air-filled bulb of the posterior portion of the alveolar arch of the tongue; for the posterior isometric tongue strength exercise, participants were instructed to use the middle portion of the tongue to press on the air-filled bulb of the middle portion of the hard palate. |
| <b>4</b>  | Expertise / training of intervention providers | Dysphagia therapy was performed by an occupational therapist with 6 years of experience with dysphagia management                                                                                                                                                                                                                                                                                                                                                                                                                                                   |
| <b>5</b>  | Mode of delivery                               | Face to face and on an individual basis                                                                                                                                                                                                                                                                                                                                                                                                                                                                                                                             |
| <b>6</b>  | Where                                          | Acute hospital setting                                                                                                                                                                                                                                                                                                                                                                                                                                                                                                                                              |
| <b>7</b>  | When and how much                              | The TPSAT group underwent TPSAT for 30 min in the morning and traditional dysphagia therapy for 30 min in the afternoon five times per week for 8 weeks. The protocol involved five sets of tongue-to-palate presses, with six repetitions per set for each session.                                                                                                                                                                                                                                                                                                |
| <b>8</b>  | Tailoring of the intervention                  | As for the isometric tongue accuracy exercise, amplitudes were set at 50, 75, and 100% of the maximum pressure measured during the first isometric strength exercise in the session for each bulb location by the occupational therapist.                                                                                                                                                                                                                                                                                                                           |
| <b>9</b>  | Modifications of intervention during study     | No modification to the intervention was stated in the study.                                                                                                                                                                                                                                                                                                                                                                                                                                                                                                        |
| <b>10</b> | Planned adherence assessment                   | Study did not state adherence was formally assessed.                                                                                                                                                                                                                                                                                                                                                                                                                                                                                                                |
| <b>11</b> | Actual adherence                               | 80% adherence. 2 drop outs accounted for in results following randomisation.                                                                                                                                                                                                                                                                                                                                                                                                                                                                                        |

Park et al 2013 <sup>[40]</sup>

| <b>TIDieR item number</b> | <b>Item descriptor</b> | <b>Item</b>                                         |
|---------------------------|------------------------|-----------------------------------------------------|
| <b>1</b>                  | Brief name             | Repetitive transcranial magnetic stimulation (RTMS) |

|           |                                                |                                                                                                                                                                                                                                                                                                                                                                                                                                                                                                                                 |
|-----------|------------------------------------------------|---------------------------------------------------------------------------------------------------------------------------------------------------------------------------------------------------------------------------------------------------------------------------------------------------------------------------------------------------------------------------------------------------------------------------------------------------------------------------------------------------------------------------------|
| <b>2</b>  | Why                                            | Studies have found that rTMS over the swallowing motor cortex induced the excitability of direct corticobulbar projections to the swallowing muscles, thereby enhancing swallowing functions.                                                                                                                                                                                                                                                                                                                                   |
| <b>3</b>  | What materials and procedures                  | Patients seated in chair and 3mm pharyngeal catheter inserted nasally and pair of surface electrodes placed on intact side of thenar muscle and connected with electromyography device and EMG signal obtained. Cranial vertex identified and marked on scalp. The pharyngeal and adjacent thenar motor hot spots were determined by discharging magnetic stimulator at supra threshold intensities over intact cortices to identify site evoking the greatest pharyngeal response and subsequent co localised thenar response. |
| <b>4</b>  | Expertise / training of intervention providers | Not stated in study                                                                                                                                                                                                                                                                                                                                                                                                                                                                                                             |
| <b>5</b>  | Mode of delivery                               | Face to face with individual patients.                                                                                                                                                                                                                                                                                                                                                                                                                                                                                          |
| <b>6</b>  | Where                                          | Acute hospital setting                                                                                                                                                                                                                                                                                                                                                                                                                                                                                                          |
| <b>7</b>  | When and how much                              | rTMS was given for 10 minutes every weekday for 2 weeks. A session consisted of ten trains of 10 trains of 5Hz stimulation each lasting 10s and then repeated every minute given through a 70mm figure of eight coil positioned over pharyngeal hot spot of the intact hemisphere. Intensity of stimulation set at 90% of the thenar motor threshold for the same hemisphere.                                                                                                                                                   |
| <b>8</b>  | Tailoring of the intervention                  | Not stated in study                                                                                                                                                                                                                                                                                                                                                                                                                                                                                                             |
| <b>9</b>  | Modifications of intervention during study     | Not stated in study                                                                                                                                                                                                                                                                                                                                                                                                                                                                                                             |
| <b>10</b> | Planned adherence assessment                   | Not stated in study                                                                                                                                                                                                                                                                                                                                                                                                                                                                                                             |
| <b>11</b> | Actual adherence                               | 100% adherence to treatment                                                                                                                                                                                                                                                                                                                                                                                                                                                                                                     |

Park et al 2018 <sup>[41]</sup>

| <b>TIDieR item number</b> | <b>Item descriptor</b> | <b>Item</b> |
|---------------------------|------------------------|-------------|
|---------------------------|------------------------|-------------|

|          |                                                |                                                                                                                                                                                                                                                                                                                                                                                                                                                                                                                                                                                                                                                                                                                                                                                                                                                                                                                                                                                  |
|----------|------------------------------------------------|----------------------------------------------------------------------------------------------------------------------------------------------------------------------------------------------------------------------------------------------------------------------------------------------------------------------------------------------------------------------------------------------------------------------------------------------------------------------------------------------------------------------------------------------------------------------------------------------------------------------------------------------------------------------------------------------------------------------------------------------------------------------------------------------------------------------------------------------------------------------------------------------------------------------------------------------------------------------------------|
| <b>1</b> | Brief name                                     | Chin Tuck against Resistance (CTAR) (ISO-CTAR Device, Alternative Speech and Swallowing Solutions) A method of training the suprahyoid muscles by placing an elastic rubber ball with resistance on the chin and sternum, and then tucking the chin against the resistance has been proposed.                                                                                                                                                                                                                                                                                                                                                                                                                                                                                                                                                                                                                                                                                    |
| <b>2</b> | Why                                            | The results of performing CTAR in normal adults demonstrate increased activation of the suprahyoid muscles involved in swallowing.                                                                                                                                                                                                                                                                                                                                                                                                                                                                                                                                                                                                                                                                                                                                                                                                                                               |
| <b>3</b> | What materials and procedures                  | The experimental group performed CTAR using a CTAR device in a sitting position on a chair. Isometric and isotonic exercises were performed separately. In isometric CTAR, the patients are asked to chin tuck against device 3 times for 60 s with no repetition. In isotonic CTAR, the patient performs 30 consecutive repetitions by strongly pressing against the resistance of the device and releasing it again. To perform the CTAR correctly, the therapist explained and demonstrated the exercise methods to all patients before the intervention. We especially emphasized on the correct chin tuck posture, so that the patients do not flex their heads against the devices. We also instructed them to press as strongly as possible for greater activation of the suprahyoid muscles. Both groups received the same conventional dysphagia treatment such as orofacial muscle exercises, thermal tactile stimulation, and therapeutic or compensatory manoeuvres. |
| <b>4</b> | Expertise / training of intervention providers | All interventions were performed by an occupational therapist with 7 years of clinical experience in treating dysphagia.                                                                                                                                                                                                                                                                                                                                                                                                                                                                                                                                                                                                                                                                                                                                                                                                                                                         |
| <b>5</b> | Mode of delivery                               | Face to face and on an individual basis                                                                                                                                                                                                                                                                                                                                                                                                                                                                                                                                                                                                                                                                                                                                                                                                                                                                                                                                          |
| <b>6</b> | Where                                          | Acute hospital setting                                                                                                                                                                                                                                                                                                                                                                                                                                                                                                                                                                                                                                                                                                                                                                                                                                                                                                                                                           |
| <b>7</b> | When and how much                              | An experienced occupational therapist performed the CTAR in all participants for 30 min/day, five days a week, for 4 weeks. Isometric and isotonic exercises using CTAR were performed separately. In isometric CTAR, the patients are asked to chin tuck against device 3 times for 60 s with no repetition. In isotonic CTAR, the patient performs 30 consecutive repetitions by strongly pressing against the resistance of the device and releasing it again.                                                                                                                                                                                                                                                                                                                                                                                                                                                                                                                |

|           |                                            |                                                                                                     |
|-----------|--------------------------------------------|-----------------------------------------------------------------------------------------------------|
| <b>8</b>  | Tailoring of the intervention              | The study did not clearly state that the intervention was adapted.                                  |
| <b>9</b>  | Modifications of intervention during study | The study did not clearly state that the intervention was modified                                  |
| <b>10</b> | Planned adherence assessment               | The study did not state it planned to assess adherence. Flowchart with study numbers were included. |
| <b>11</b> | Actual adherence                           | 11/13 participants completed intervention and data used in final analysis                           |

Park 2019 [42]

| <b>TIDieR item number</b> | <b>Item descriptor</b>                         | <b>Item</b>                                                                                                                                                                                                                                                                                |
|---------------------------|------------------------------------------------|--------------------------------------------------------------------------------------------------------------------------------------------------------------------------------------------------------------------------------------------------------------------------------------------|
| <b>1</b>                  | Brief name                                     | Effortful swallowing training (EST)                                                                                                                                                                                                                                                        |
| <b>2</b>                  | Why                                            | Studies report EST improves tongue strength and induces activation of suprahyoid muscles, the main muscles in pharyngeal phase of swallowing.                                                                                                                                              |
| <b>3</b>                  | What materials and procedures                  | During effortful swallowing training patients were asked to push the tongue firmly onto the palate, while squeezing the neck muscles and swallow as forcefully as possible. Effortful swallowing was confirmed by therapist through visual observation and palpation during this exercise. |
| <b>4</b>                  | Expertise / training of intervention providers | Occupational Therapist delivering the intervention had seven years experience delivering dysphagia treatments. Specific training was not stipulated.                                                                                                                                       |
| <b>5</b>                  | Mode of delivery                               | Face to face and individual.                                                                                                                                                                                                                                                               |
| <b>6</b>                  | Where                                          | Acute stroke unit in South Korea.                                                                                                                                                                                                                                                          |
| <b>7</b>                  | When and how much                              | Effortful swallowing training was performed 10 times per session, 3 sessions per day, 5 days per week for 4 weeks. It was combined with traditional swallowing exercises as per control group in the study.                                                                                |
| <b>8</b>                  | Tailoring of the intervention                  | This was not reported in the study                                                                                                                                                                                                                                                         |
| <b>9</b>                  | Modifications of intervention during study     | The intervention was not modified                                                                                                                                                                                                                                                          |
| <b>10</b>                 | Planned adherence assessment                   | Adherence to the intervention was reported as complete. No detail of who assessed or if any strategies were used to maintain or improve fidelity were given.                                                                                                                               |

|           |                  |                                                             |
|-----------|------------------|-------------------------------------------------------------|
| <b>11</b> | Actual adherence | 12/15 patients in each experimental arm finished the study. |
|-----------|------------------|-------------------------------------------------------------|

Suntrup et al 2015 <sup>[43]</sup>

| <b>TIDieR item number</b> | <b>Item descriptor</b>                         | <b>Item</b>                                                                                                                                                                                                                                                                                                                                                                                                                                                                                                                                                                                                                     |
|---------------------------|------------------------------------------------|---------------------------------------------------------------------------------------------------------------------------------------------------------------------------------------------------------------------------------------------------------------------------------------------------------------------------------------------------------------------------------------------------------------------------------------------------------------------------------------------------------------------------------------------------------------------------------------------------------------------------------|
| <b>1</b>                  | Brief name                                     | Pharyngeal electrical stimulation. This intervention is a novel neuro stimulation treatment for dysphagia that triggers neuro plastic reorganisation of swallowing control.                                                                                                                                                                                                                                                                                                                                                                                                                                                     |
| <b>2</b>                  | Why                                            | Electrical pharyngeal stimulation (EPS) has been shown to improve swallowing function and in particular decrease airway aspiration in acute stroke patients                                                                                                                                                                                                                                                                                                                                                                                                                                                                     |
| <b>3</b>                  | What materials and procedures                  | Stimulation was delivered via the Phagenyx catheter system and base station (Phagenesis Ltd, UK). The system consists of a nasogastric feeding tube housing a pair of bipolar titanium ring electrodes with a distance of 10 mm in between. The electrodes were positioned in the middle pharynx. Correct positioning of the electrodes was visually confirmed by fiberoptic endoscopic evaluation of swallowing. The catheter was connected to the base station to deliver stimuli of 0.2 ms pulse duration at a frequency of 5 Hz with 280 V, which had previously been found to be the most effective stimulation parameters |
| <b>4</b>                  | Expertise / training of intervention providers | Not clearly stated in study                                                                                                                                                                                                                                                                                                                                                                                                                                                                                                                                                                                                     |
| <b>5</b>                  | Mode of delivery                               | Face to face and individual                                                                                                                                                                                                                                                                                                                                                                                                                                                                                                                                                                                                     |
| <b>6</b>                  | Where                                          | Neurological intensive care unit, Germany.                                                                                                                                                                                                                                                                                                                                                                                                                                                                                                                                                                                      |
| <b>7</b>                  | When and how much                              | In the treatment condition stimulation was afterwards delivered for a total of 10 min at this intensity, The intervention was repeated daily for three consecutive days. The stimulation catheter remained in place over this period of time and was used as a regular feeding tube between treatment sessions                                                                                                                                                                                                                                                                                                                  |
| <b>8</b>                  | Tailoring of the intervention                  | Yes intervention was tailored to patients. The current intensity (mA) was individually adjusted in every session. Therefore prior to the actual intervention the perceptual threshold (PT) and the maximum tolerated threshold (MTT) were determined repeatedly by slowly increasing the current. The average values of three trials were taken into                                                                                                                                                                                                                                                                            |

|           |                                            |                                                                                                                                                                     |
|-----------|--------------------------------------------|---------------------------------------------------------------------------------------------------------------------------------------------------------------------|
|           |                                            | account for the calculation of the optimal stimulation intensity. Thresholds as well as calculated optimal stimulation intensities were documented at each session. |
| <b>9</b>  | Modifications of intervention during study | The intervention was not modified                                                                                                                                   |
| <b>10</b> | Planned adherence assessment               | Adherence to the intervention was reported as complete. No detail of who assessed or if any strategies were used to maintain or improve fidelity were given.        |
| <b>11</b> | Actual adherence                           | All recruited patients finished the study. All participants in experimental arm were analysed post treatment. 100% adherence                                        |

Suntrup-Kreugar 2018 <sup>[44]</sup>

| <b>TIDieR item number</b> | <b>Item descriptor</b>        | <b>Item</b>                                                                                                                                                                                                                                                                                                                                                                                                                                                                                                                                                                                                                                                                                                                                                                                                                                                                                                            |
|---------------------------|-------------------------------|------------------------------------------------------------------------------------------------------------------------------------------------------------------------------------------------------------------------------------------------------------------------------------------------------------------------------------------------------------------------------------------------------------------------------------------------------------------------------------------------------------------------------------------------------------------------------------------------------------------------------------------------------------------------------------------------------------------------------------------------------------------------------------------------------------------------------------------------------------------------------------------------------------------------|
| <b>1</b>                  | Brief name                    | Transcranial direct current stimulation (TDCS) was delivered by a battery-driven constant current stimulator (Neuro Conn, Ilmenau, Germany)                                                                                                                                                                                                                                                                                                                                                                                                                                                                                                                                                                                                                                                                                                                                                                            |
| <b>2</b>                  | Why                           | TDCS promotes brain plasticity by tonic stimulation with weak direct currents, with evidence now available that anodal tDCS is able to excite the pharyngeal motor cortex                                                                                                                                                                                                                                                                                                                                                                                                                                                                                                                                                                                                                                                                                                                                              |
| <b>3</b>                  | What materials and procedures | If the patient's condition allowed, swallowing exercises (dry swallows, effortful swallows, administration of fluids or pudding, depending on the patient's swallowing abilities) were performed during stimulation. Patients not able to perform any swallowing exercises were asked to stay relaxed with their eyes open. Whether swallowing training was performed during tDCS was documented. Stimulation was delivered by a battery-driven constant current stimulator through a pair of conductive-rubber electrodes in saline-soaked sponges. As previously described, we positioned the center of the anode approximately 3.5cm lateral and 1cm anterior to the vertex with its long axis parallel to the central sulcus to cover the center of the motor cortical swallowing network. The reference electrode had a larger size to diminish its functional effect and was placed over the contralateral orbit |

|           |                                                |                                                                                                                                                                                                                                                                                                                                                                                                                                                                                      |
|-----------|------------------------------------------------|--------------------------------------------------------------------------------------------------------------------------------------------------------------------------------------------------------------------------------------------------------------------------------------------------------------------------------------------------------------------------------------------------------------------------------------------------------------------------------------|
| <b>4</b>  | Expertise / training of intervention providers | No details on personnel delivering the intervention, their training or expertise given.                                                                                                                                                                                                                                                                                                                                                                                              |
| <b>5</b>  | Mode of delivery                               | Face to face and on an individual level assumed as no group therapy described, so individual sessions assumed.                                                                                                                                                                                                                                                                                                                                                                       |
| <b>6</b>  | Where                                          | Acute hospital ward                                                                                                                                                                                                                                                                                                                                                                                                                                                                  |
| <b>7</b>  | When and how much                              | Anodal tDCS was performed at 1mA for 20 minutes, once daily on 4 consecutive days. If the patient's condition allowed, swallowing exercises (dry swallows, effortful swallows, administration of fluids or pudding, depending on the patient's swallowing abilities) were performed during stimulation. Patients not able to perform any swallowing exercises were asked to stay relaxed with their eyes open. Whether swallowing training was performed during tDCS was documented. |
| <b>8</b>  | Tailoring of the intervention                  | Not stated in this study                                                                                                                                                                                                                                                                                                                                                                                                                                                             |
| <b>9</b>  | Modifications of intervention during study     | Not stated in this study                                                                                                                                                                                                                                                                                                                                                                                                                                                             |
| <b>10</b> | Planned adherence assessment                   | No formal adherence assessment was described in the study.                                                                                                                                                                                                                                                                                                                                                                                                                           |
| <b>11</b> | Actual adherence                               | 1 drop out from randomised population.                                                                                                                                                                                                                                                                                                                                                                                                                                               |

Vasant et al 2016 <sup>[45]</sup>

| <b>TIDieR item number</b> | <b>Item descriptor</b>        | <b>Item</b>                                                                                                                                                                                                                                                                          |
|---------------------------|-------------------------------|--------------------------------------------------------------------------------------------------------------------------------------------------------------------------------------------------------------------------------------------------------------------------------------|
| <b>1</b>                  | Brief name                    | Pharyngeal electrical stimulation as described in detail in materials and procedures section.                                                                                                                                                                                        |
| <b>2</b>                  | Why                           | Intraluminal pharyngeal electrical stimulation (PES) is one such neuro stimulation technique that has been shown to promote this type of plasticity in healthy individuals and achieve measurable improvements in swallowing function in dysphagic stroke patients.                  |
| <b>3</b>                  | What materials and procedures | Based on previous pharyngeal electrode placement experience in clinically dysphagic patients, the intraluminal pharyngeal "stimulation" catheter (Gaeltec, Dunvegan, Isle of Skye, UK) was inserted either orally or nasally (depending on patient preference) such that its bipolar |

|           |                                                |                                                                                                                                                                                                                                                                                                                                                                                                                                |
|-----------|------------------------------------------------|--------------------------------------------------------------------------------------------------------------------------------------------------------------------------------------------------------------------------------------------------------------------------------------------------------------------------------------------------------------------------------------------------------------------------------|
|           |                                                | electrodes were secured at the mid pharyngeal level (17 cm from the nasal flare or 15 cm aboral). The catheter was connected to a stimulator (Model DS7; Digitimer, Welwyn-Garden City, Herts, UK) via a trigger generator (Neurolog System, Digitimer), and stimuli were delivered (0.2 ms pulses, maximum 280 V) at the previously defined optimal parameters (5 Hz frequency and an intensity [current] 75% of the maximum. |
| <b>4</b>  | Expertise / training of intervention providers | Interventions were delivered by a trained researcher independent of the clinical team.                                                                                                                                                                                                                                                                                                                                         |
| <b>5</b>  | Mode of delivery                               | Face to face and individual basis as at patient's bedside in hospital for treatment.                                                                                                                                                                                                                                                                                                                                           |
| <b>6</b>  | Where                                          | Acute stroke unit in acute hospital setting                                                                                                                                                                                                                                                                                                                                                                                    |
| <b>7</b>  | When and how much                              | Group 1 received 3 sessions of PES for 10 minutes on 3 consecutive day. Both groups continued to receive standard swallowing treatments as decided by Speech and Language of the respective hospital                                                                                                                                                                                                                           |
| <b>8</b>  | Tailoring of the intervention                  | The maximum tolerated intensity was determined from each patient's perception and pain thresholds; these values were calculated from an average of 3 consecutive measurements on each of the 3 days                                                                                                                                                                                                                            |
| <b>9</b>  | Modifications of intervention during study     | No modification to intervention stated in this study.                                                                                                                                                                                                                                                                                                                                                                          |
| <b>10</b> | Planned adherence assessment                   | No planned adherence assessment was described in the study                                                                                                                                                                                                                                                                                                                                                                     |
| <b>11</b> | Actual adherence                               | Of the 14 patients who actually received active PES, only 1 patient received suboptimal stimulation (2 doses), whereas the rest received all 3 doses. 14/18 randomised received PES, 4 drop outs: 2 normal swallows, 2 withdrew consent.                                                                                                                                                                                       |

Wu et al 2011 <sup>[46]</sup>

| <b>TIDieR item number</b> | <b>Item descriptor</b> | <b>Item</b>                                                                                                                              |
|---------------------------|------------------------|------------------------------------------------------------------------------------------------------------------------------------------|
| <b>1</b>                  | Brief name             | Acupuncture                                                                                                                              |
| <b>2</b>                  | Why                    | Some studies showed positive but limited effectiveness of acupuncture as an adjunct treatment to conventional swallowing rehabilitation. |



|           |                                                |                                                                                                                                                                                                                                                                                                                                                                                                                                                                                                                                                                                                                                                                                                                                  |
|-----------|------------------------------------------------|----------------------------------------------------------------------------------------------------------------------------------------------------------------------------------------------------------------------------------------------------------------------------------------------------------------------------------------------------------------------------------------------------------------------------------------------------------------------------------------------------------------------------------------------------------------------------------------------------------------------------------------------------------------------------------------------------------------------------------|
| <b>3</b>  | What materials and procedures                  | Patient seated in supine position. A 35mm and 40 mm acupuncture needle penetrates the acupuncture point of Lianquan towards the pharynx. Twist quickly for one minute (frequency 120 per minute) and pull out needle. Needling depth is about 0.8inches. Re-acupuncture to point of Fengchi towards the laryngeal prominence. Needling depth is about 1.2 inches. Yifeng toward to the prominentia laryngea. Needling depth is about 1.2 inches. Remying: penetrate the skin directly with needling depth of 1.0 inches. After twisting needles for one minute, using SDZ-II therapeutic apparatus to stimulate the acupuncture points, choosing discontinuous wave, the frequency is 15-20Hz and the stimulus intensity is 5mA. |
| <b>4</b>  | Expertise / training of intervention providers | Training and expertise of personnel delivering intervention was not stated in study.                                                                                                                                                                                                                                                                                                                                                                                                                                                                                                                                                                                                                                             |
| <b>5</b>  | Mode of delivery                               | Presumed on an individual basis though not explicitly stated in study                                                                                                                                                                                                                                                                                                                                                                                                                                                                                                                                                                                                                                                            |
| <b>6</b>  | Where                                          | Acute hospital setting                                                                                                                                                                                                                                                                                                                                                                                                                                                                                                                                                                                                                                                                                                           |
| <b>7</b>  | When and how much                              | All needles in position for 30 minutes except the Lanquan point. Treatment given once a day, 5 treatments a week for four weeks.                                                                                                                                                                                                                                                                                                                                                                                                                                                                                                                                                                                                 |
| <b>8</b>  | Tailoring of the intervention                  | Not stated in study                                                                                                                                                                                                                                                                                                                                                                                                                                                                                                                                                                                                                                                                                                              |
| <b>9</b>  | Modifications of intervention during study     | Not stated in study                                                                                                                                                                                                                                                                                                                                                                                                                                                                                                                                                                                                                                                                                                              |
| <b>10</b> | Planned adherence assessment                   | Not stated in study                                                                                                                                                                                                                                                                                                                                                                                                                                                                                                                                                                                                                                                                                                              |
| <b>11</b> | Actual adherence                               | 6 drop outs from totally of 229 patients in study.                                                                                                                                                                                                                                                                                                                                                                                                                                                                                                                                                                                                                                                                               |

Xia et al 2011 [47]

| <b>TIDieR item number</b> | <b>Item descriptor</b> | <b>Item</b>                                                                                                                 |
|---------------------------|------------------------|-----------------------------------------------------------------------------------------------------------------------------|
| <b>1</b>                  | Brief name             | Neuromuscular electrical stimulation using the Intellect VitalStim device (VitalStim®, Chattanooga Group, Hixson, TN, USA). |
| <b>2</b>                  | Why                    | This therapy bypasses the injured central swallowing circuitries such as stroke and delivers an electrical current          |

|           |                                                |                                                                                                                                                                                                                                                              |
|-----------|------------------------------------------------|--------------------------------------------------------------------------------------------------------------------------------------------------------------------------------------------------------------------------------------------------------------|
|           |                                                | via electrodes that are placed on the neck muscles to create a contraction of the swallowing muscles.                                                                                                                                                        |
| <b>3</b>  | What materials and procedures                  | Vital stim system contains two direction square waves with wave width being 700 us, frequency 80Hz and wave amplitude 0-25mili amps. Electrode position and treatment mode selected according to videofluoroscopy scores, patient's tolerance and condition. |
| <b>4</b>  | Expertise / training of intervention providers | All therapy performed by experienced Speech and Language Therapists blinded to the experimental design.                                                                                                                                                      |
| <b>5</b>  | Mode of delivery                               | Face to face and individual                                                                                                                                                                                                                                  |
| <b>6</b>  | Where                                          | Acute hospital setting                                                                                                                                                                                                                                       |
| <b>7</b>  | When and how much                              | Treatment administered twice a day, lasting 30 minutes each time, 5 days a week for 4 successive weeks.                                                                                                                                                      |
| <b>8</b>  | Tailoring of the intervention                  | Yes as depended on results of videofluoroscopy assessment as to which electrode placement and treatment mode was selected.                                                                                                                                   |
| <b>9</b>  | Modifications of intervention during study     | Not stated in the study                                                                                                                                                                                                                                      |
| <b>10</b> | Planned adherence assessment                   | Not stated in the study                                                                                                                                                                                                                                      |
| <b>11</b> | Actual adherence                               | 100% adherence assumed as all participants included in final analysis.                                                                                                                                                                                       |

Yang et al 2012 <sup>[48]</sup>

| <b>TIDieR item number</b> | <b>Item descriptor</b> | <b>Item</b>                                                                                                                                                                                                                                                                                                                                                       |
|---------------------------|------------------------|-------------------------------------------------------------------------------------------------------------------------------------------------------------------------------------------------------------------------------------------------------------------------------------------------------------------------------------------------------------------|
| <b>1</b>                  | Brief name             | Transcranial direct current stimulation (TDCS), a form of non-invasive brain stimulation, is reported to improve motor function after stroke. It modulates cortical excitability in a polarity dependent manner, it increases cortical excitability by depolarising resting membrane potential. It can be combined with various types of rehabilitation training. |
| <b>2</b>                  | Why                    | In this study we tested the hypothesis that anodal tDCS over the affected hemisphere, combined with swallow training in patients with post-stroke dysphagia, might elicit greater improvements in swallowing function than sham stimulation.                                                                                                                      |

|           |                                                |                                                                                                                                                                                                                                                                                                                                                                                                                                                                                                                                                                                                                                |
|-----------|------------------------------------------------|--------------------------------------------------------------------------------------------------------------------------------------------------------------------------------------------------------------------------------------------------------------------------------------------------------------------------------------------------------------------------------------------------------------------------------------------------------------------------------------------------------------------------------------------------------------------------------------------------------------------------------|
| <b>3</b>  | What materials and procedures                  | Anodal tDCS, the direct current was increased to 1 mA incrementally over several seconds and maintained for 20 mins in anodal tDCS. A saline soaked electrode was placed over the patient's scalp of the affected hemisphere in the region, which was reported to induce maximal pharyngeal response (anterior 4.6cm and lateral 6.15cm from vertex in right hemisphere stimulation; anterior 4cm and lateral 7.1m in left hemisphere with a reference electrode over the contralateral supraorbital region. The electrodes were secured using adjustable straps placed around the head.                                       |
| <b>4</b>  | Expertise / training of intervention providers | Two trained therapists administered swallow training. tDCS and sham was administered by investigators who did not participate in outcome assessments. The professional background, expertise or relevant training of these personnel was not stated in the study.                                                                                                                                                                                                                                                                                                                                                              |
| <b>5</b>  | Mode of delivery                               | Face to face and on an individual level.                                                                                                                                                                                                                                                                                                                                                                                                                                                                                                                                                                                       |
| <b>6</b>  | Where                                          | Acute hospital setting.                                                                                                                                                                                                                                                                                                                                                                                                                                                                                                                                                                                                        |
| <b>7</b>  | When and how much                              | All subjects received 10 intervention sessions (five per week for 2 weeks) of tDCS during conventional swallow training. tDCS was administered at the beginning of 20 mins with swallow training and then swallow training alone continued for the remaining 10 mins. Swallow training included compensatory strategies such as diet modification, positioning, behavioural manoeuvres including Menelsohn manoeuvre, supraglottic and effortful swallowing. Indirect therapies included physical manoeuvre such as oral motor exercise and thermal tactile stimulation. The anodal tDCS was delivered to affected hemisphere. |
| <b>8</b>  | Tailoring of the intervention                  | No tailoring of the intervention appeared necessary or was described in this study.                                                                                                                                                                                                                                                                                                                                                                                                                                                                                                                                            |
| <b>9</b>  | Modifications of intervention during study     | The intervention was not modified or stated to have been modified.                                                                                                                                                                                                                                                                                                                                                                                                                                                                                                                                                             |
| <b>10</b> | Planned adherence assessment                   | Planned assessment of adherence to the intervention was not stated in this study                                                                                                                                                                                                                                                                                                                                                                                                                                                                                                                                               |
| <b>11</b> | Actual adherence                               | 100% adherence to the experimental intervention by all 9 participants in this group.                                                                                                                                                                                                                                                                                                                                                                                                                                                                                                                                           |

## Appendix D: Outcome reporting as per SPIRIT [23]

| <b>Time to return to oral intake</b> | Definition provided | Measurement units | Time-point     |
|--------------------------------------|---------------------|-------------------|----------------|
| Hwang et al [34]                     | No                  | Days              | Post treatment |

### Secondary outcomes

| <b>Aspiration incidence post treatment</b> | Definition provided                                                                                            | Measurement units (analysis metric and method of aggregation) | Time-point  |
|--------------------------------------------|----------------------------------------------------------------------------------------------------------------|---------------------------------------------------------------|-------------|
| Guillan-Sola et al [32]                    | Oral food, fluids or saliva entering below level of vocal cords into trachea and not be expelled out of larynx | Penetration aspiration score >5 on 1-8 scale                  | 3 months    |
| Park et al [40]                            | Graded patients who aspirated as grade 3.                                                                      | Penetration aspiration score on 1-8 scale used                | 2 weeks     |
| Huang et al [33]                           | As above                                                                                                       | Penetration aspiration score > 5 on 1-8 scale                 | Not defined |
| Yang et al [48]                            | As above                                                                                                       | Penetration aspiration score > 5 on 1-8 scale                 | 3 months    |

| <b>Pneumonia incidence</b> | Definition provided                                                                                                                                                                                                        | Measurement units (analysis metric and method of aggregation) | Time-point                   |
|----------------------------|----------------------------------------------------------------------------------------------------------------------------------------------------------------------------------------------------------------------------|---------------------------------------------------------------|------------------------------|
| Bath et al [27]            | Chest infection or pneumonia diagnosed in local participating units                                                                                                                                                        | Number of events                                              | Post randomisation           |
| Dziewas et al [31]         | Pneumonia but no definition given for this diagnosis in study.                                                                                                                                                             | Number of events                                              | Day 30                       |
| Jayasekeran et al [35]     | Lower respiratory tract infection defined as clinically diagnosed chest infection requiring either oral or intravenous antibiotics.                                                                                        | Number of events                                              | During hospital admission    |
| Vasant et al [45]          | Chest infection but no definition given for this diagnosis.                                                                                                                                                                | Number of events                                              | 2 months after randomisation |
| Suntrup-Kreugar et al [44] | Pneumonia diagnosed by treating physician                                                                                                                                                                                  | Number of events                                              | During hospital admission    |
| Guillen-Sola et al [32]    | Respiratory complications defined as presence of lung infections shown on chest x-ray or by fever or abnormal respiratory signs according to information obtained from medical report and telephone interview at follow up | Number of events                                              | 3 months                     |

|                               |                                                                                                                                                                               |                  |             |
|-------------------------------|-------------------------------------------------------------------------------------------------------------------------------------------------------------------------------|------------------|-------------|
| Carnaby et al <sup>[28]</sup> | Chest infection defined at least 3 of: fever > 38C; productive cough; abnormal respiratory exam; arterial hypoxaemia; culture of relevant pathogen; positive chest radiograph | Number of events | 6 months    |
| Hwang et al <sup>[34]</sup>   | Aspiration pneumonia but no definition for this diagnosis provided in study                                                                                                   | Number of events | Not defined |

| <b>Quality of life</b>     | Definition provided                                                                                                        | Measurement units (analysis metric and method of aggregation) | Time-point                                 |
|----------------------------|----------------------------------------------------------------------------------------------------------------------------|---------------------------------------------------------------|--------------------------------------------|
| Moon et al <sup>[39]</sup> | Eating duration & desire, symptom frequency, food selection, communication, fear, mental health, social, fatigue and sleep | Swallowing-related quality of life scale score                | Post intervention, time-point not defined. |
| Wu et al <sup>[46]</sup>   | As above                                                                                                                   | Swallowing related quality of life scale score                | Post intervention, time-point not defined  |
| Xia et al <sup>[47]</sup>  | As above                                                                                                                   | Swallowing-related quality of life scale score                | Post intervention, time-point not defined. |

| <b>Length of hospital stay</b>        | Definition provided                   | Measurement units (analysis metric and method of aggregation) | Time-point                 |
|---------------------------------------|---------------------------------------|---------------------------------------------------------------|----------------------------|
| Bath et al <sup>[27]</sup>            | Time of admission to discharge period | Days                                                          | At discharge from hospital |
| Suntrup et al <sup>[43]</sup>         | Time of treatment to discharge        | Days                                                          | At discharge from hospital |
| Suntrup-Kreugar et al <sup>[44]</sup> | Time in hospital                      | Days                                                          | Not defined                |
| Carnaby et al <sup>[28]</sup>         | Not defined                           | Days                                                          | No defined                 |
| Vasant <sup>[45]</sup>                | Randomisation to hospital discharge   | Days                                                          | At discharge from hospital |

| <b>Pharyngeal residue severity</b> | Definition provided                                                                                                                  | Measurement units (analysis metric and method of aggregation)                                                                           | Time-point                                                                       |
|------------------------------------|--------------------------------------------------------------------------------------------------------------------------------------|-----------------------------------------------------------------------------------------------------------------------------------------|----------------------------------------------------------------------------------|
| Moon et al <sup>[38]</sup>         | Pharyngeal residue defined by 4 grades:<br>Grade 0=no residue<br>Grade 1= 25% or less<br>Grade 2 = 25-50%<br>Grade 3 = > 50% residue | Residue severity graded during videofluoroscopy using Eisenhuber et al rating <sup>[59]</sup>                                           | Post 4 week intervention period. Exact time-point post intervention not defined. |
| Park et al <sup>[41]</sup>         | No definition provided                                                                                                               | Functional Dysphagia Scale <sup>[58]</sup> Sub-score in this assessment for rating pharyngeal residue severity during videofluoroscopy. | Post 4 week intervention period. Exact time-point post intervention not defined. |
| Park et al <sup>[40]</sup>         | Residue graded using 4 levels of severity in VDS during videofluoroscopy                                                             | Videofluoroscopic Dysphagia Scale (VDS) <sup>[60]</sup>                                                                                 | Week 2 and week 4 post treatment                                                 |

|                            |                                       |                                                              |                                                      |
|----------------------------|---------------------------------------|--------------------------------------------------------------|------------------------------------------------------|
|                            |                                       | No residue = 0<br><10% residue = 2<br>10-50% = 4<br>>50% = 6 |                                                      |
| Park et al <sup>[42]</sup> | No definition provided in publication | Videofluoroscopic Dysphagia Scale (VDS) <sup>[60]</sup>      | Baseline and at 4 weeks (immediately post treatment) |

| <b>Intervention-related adverse events</b> | Definition provided                                              | Measurement units (analysis metric and method of aggregation) | Time-point                        |
|--------------------------------------------|------------------------------------------------------------------|---------------------------------------------------------------|-----------------------------------|
| Du et al <sup>[30]</sup>                   | Defined as transient headaches or tingling sensation in the head | Number of events per participant                              | Following first treatment session |
| Dziewas et al <sup>[31]</sup>              | Medical device complication                                      | Number of events per participant                              | Time-point not defined            |

| <b>Nutritional status</b>  | Definition provided | Measurement units          | Time-point                       |
|----------------------------|---------------------|----------------------------|----------------------------------|
| Bath et al <sup>[27]</sup> | Blood albumin level | Measured grams / per litre | 2, 6 and 12 weeks post treatment |

## Appendix E: Summary of characteristics of included studies

| Author and publication year                              | Methods                                                                                                                                                                                          | Participants                                                                                                                                                                                                                                                                      | Summary of intervention tested                                                                                                                                                                          | Summary of usual care                                                                                                                     | Key outcomes                                                                                                                                                                                                                                |
|----------------------------------------------------------|--------------------------------------------------------------------------------------------------------------------------------------------------------------------------------------------------|-----------------------------------------------------------------------------------------------------------------------------------------------------------------------------------------------------------------------------------------------------------------------------------|---------------------------------------------------------------------------------------------------------------------------------------------------------------------------------------------------------|-------------------------------------------------------------------------------------------------------------------------------------------|---------------------------------------------------------------------------------------------------------------------------------------------------------------------------------------------------------------------------------------------|
| Bath 2016 <sup>[27]</sup><br>Multi-centre trial<br>UK    | <ul style="list-style-type: none"> <li>• RCT</li> <li>• Computerised randomisation</li> <li>• Blinded outcome assessors</li> </ul>                                                               | N= 162<br>Mean age 74 years<br><u>Inclusion:</u><br>Videofluoroscopy confirmed dysphagia<br><u>Exclusion:</u><br>Dysphagia history, advanced dementia, implanted cardiac device or pacemaker, distorted oropharyngeal anatomy, pregnant.                                          | Pharyngeal electrical stimulation<br><br>Treatment protocol: 10 minutes pharyngeal electrical stimulation over 3 consecutive days and standard stroke rehabilitation (no specific description provided) | Sham stimulation (3 sessions x 10 minutes ) and standard swallowing therapy                                                               | Primary:<br>Change in penetration-aspiration scores at 2 weeks post treatment.<br>Secondary:<br>Safety outcomes, clinical dysphagia, dependency, activities of daily living, quality of life, nutritional measures).<br>Follow-up: 12 weeks |
| Carnaby <sup>[28]</sup><br>US & Australia                | <ul style="list-style-type: none"> <li>• RCT</li> <li>• 3 arm study</li> <li>• Computerised randomisation</li> <li>• Blinded outcome assessors</li> <li>• Intention to treat analysis</li> </ul> | (N=306)<br>Mean age: 71 years<br>Baseline characteristics similar<br><u>Inclusion:</u><br>Clinical & videofluoroscopy evidence of dysphagia, enrol within 2 weeks of stroke onset<br><u>Exclusion:</u><br>Previous dysphagia therapy, head and neck surgery, inability to consent | Standard swallowing therapy involving exercises such as supraglottic, effortful and Mendelsohn<br><br>(data combined in this review as similar interventions)                                           | Mealtime supervision, safe feeding guidance, referral to speech / language therapy service if deemed appropriate by medical practitioner. | Time to return to normal diet (6 month time point)<br>Aspiration pneumonia<br>Dysphagia (PHADscore < 85).<br><br>Follow-up timepoint: 6 months                                                                                              |
| Chen 2016 <sup>[29]</sup><br>Multi-centre trial<br>China | <ul style="list-style-type: none"> <li>• RCT</li> <li>• Random number generation</li> <li>• Blinded outcome assessors</li> </ul>                                                                 | (N= 250 participants)<br>Mean age: 63 years<br>Baseline characteristics similar<br><u>Inclusion:</u>                                                                                                                                                                              | Acupuncture and conventional stroke rehabilitation<br>3 week duration                                                                                                                                   | Conventional stroke rehabilitation including 'swallow training for dysphagia' (part of 2 hour physio and occupational                     | Primary: National Institute of Stroke Severity Scale Index<br>Secondary: motor function, rate of recovery                                                                                                                                   |

|                                                                                                                 |                                                                                                                                                                                                       |                                                                                                                                                                                                                                                                                                                                                  |                                                                                                                                                                                                                                                         |                                                                                 |                                                                                                                                                                             |
|-----------------------------------------------------------------------------------------------------------------|-------------------------------------------------------------------------------------------------------------------------------------------------------------------------------------------------------|--------------------------------------------------------------------------------------------------------------------------------------------------------------------------------------------------------------------------------------------------------------------------------------------------------------------------------------------------|---------------------------------------------------------------------------------------------------------------------------------------------------------------------------------------------------------------------------------------------------------|---------------------------------------------------------------------------------|-----------------------------------------------------------------------------------------------------------------------------------------------------------------------------|
|                                                                                                                 |                                                                                                                                                                                                       | Acute stroke within 2-7 days, clinical & videofluoroscopy evidence of dysphagia.<br><u>Exclusion:</u><br>Inability to complete cognitive / swallow assessments, posterior circulation infarct, receiving thrombolytics, involved in other clinical trial in previous 3 months                                                                    |                                                                                                                                                                                                                                                         | therapy rehabilitation x 6 days per week x 3 weeks)                             | based on bedside swallow assessment, videofluoroscopy, Mini-mental state exam, Montreal Cognitive Assessment                                                                |
| Du 2016 <sup>[30]</sup><br>Single centre study<br>China                                                         | <ul style="list-style-type: none"> <li>• RCT</li> <li>• 3 arm study</li> <li>• Sealed envelopes</li> <li>• Blinded outcome assessors</li> </ul>                                                       | (N=40)<br>Mean age 58.5years<br>Baseline characteristics similar between groups<br><u>Inclusion:</u><br>Within 2 months of stroke onset confirmed by imaging, clinical evidence of dysphagia<br><u>Exclusion:</u><br>other neurological disease, severe aphasia or cognitive impairment, contraindications for transcranial magnetic stimulation | Repetitive transmagnetic stimulation, 2 experimental groups, (1 Hz & 3 Hz intensity).<br>Treatment duration: 5 consecutive days.<br>Length of treatment session not stipulated in study.<br><br>(Data combined in this review as similar interventions) | Sham stimulation                                                                | Swallow function score using Standardised Swallowing Assessment, Modified Rankin score, measures of mylohyoid motor evoked potentials<br><br>Follow up time-point: 3 months |
| Dziewas 2018 <sup>[31]</sup><br>Multinational study<br><br>Germany<br>The Netherlands<br>Austria<br>Italy<br>UK | <ul style="list-style-type: none"> <li>• RCT followed by open label study</li> <li>• Computerised randomisation</li> <li>• Blinded outcome assessors</li> <li>• Full reporting of outcomes</li> </ul> | (N=69)<br>Mean age 64 years<br>No baseline differences between groups<br><u>Inclusion:</u><br>Participants had severe dysphagia following acute stroke precluding tracheostomy decannulation<br><u>Exclusion:</u>                                                                                                                                | Pharyngeal electrical stimulation<br>Treatment: 10 minutes stimulation x 3 consecutive days                                                                                                                                                             | Sham stimulation<br>Treatment: 10 minutes sham-stimulation x 3 consecutive days | Primary: time to decannulation post intervention<br>Secondary: swallow function, severity of stroke, length of stay and adverse events.                                     |



|                                                                                   |                                                                                                                                                       |                                                                                                                                                                                                                                                                                                                                 |                                                                                                                                                                                       |                                                                                                                                                                                                                     |                                                                                                                                                                                      |
|-----------------------------------------------------------------------------------|-------------------------------------------------------------------------------------------------------------------------------------------------------|---------------------------------------------------------------------------------------------------------------------------------------------------------------------------------------------------------------------------------------------------------------------------------------------------------------------------------|---------------------------------------------------------------------------------------------------------------------------------------------------------------------------------------|---------------------------------------------------------------------------------------------------------------------------------------------------------------------------------------------------------------------|--------------------------------------------------------------------------------------------------------------------------------------------------------------------------------------|
|                                                                                   |                                                                                                                                                       | Infratentorial stroke, pre-existing dysphagia, presence of cardiac pacemaker or implanted device, previous oesophageal surgery, less than 3 months life expectancy                                                                                                                                                              |                                                                                                                                                                                       |                                                                                                                                                                                                                     |                                                                                                                                                                                      |
| Guillen-Sola 2017 <sup>[32]</sup><br>Single centre study<br>Spain<br>(Data set 1) | <ul style="list-style-type: none"> <li>• RCT</li> <li>• 3 arm study</li> <li>• Randomisation software</li> <li>• Blinded outcome assessors</li> </ul> | <p>N=31<br/>Mean age 69 years<br/>No significant group differences at baseline.</p> <p><u>Inclusion:</u><br/>Subacute ischaemic stroke, dysphagia confirmed by penetration aspiration score &gt; 3 on videofluoroscopy.</p> <p><u>Exclusion:</u><br/>Participants with cognitive impairment, previous neurological disease.</p> | Neuromuscular electrical stimulation, sham respiratory muscle strength training & standard swallowing therapy<br>Protocol: 40 minutes treatment, 5 days per week for 3 weeks          | Standard swallowing therapy (i.e. education, oral exercises & compensatory techniques).<br>1 hour per day x 5 days a week x 3 weeks.<br><br>(Control group number split in half for meta-analysis in this review)   | Respiratory muscle function, severity of dysphagia (using PAS, VVST, DOSS), occurrence of respiratory complications (chest x-ray, fever)<br>Follow-up timepoints: 3 weeks, 3 months. |
| Guillen-Sola 27 <sup>[32]</sup><br>Single centre study<br>Spain<br>(Data set 2)   | <ul style="list-style-type: none"> <li>• RCT</li> <li>• 3 arm study</li> <li>• Randomisation software</li> <li>• Blinded outcome assessors</li> </ul> | <p>N=31<br/>Mean age 69 years<br/>No significant group differences at baseline</p> <p><u>Inclusion:</u><br/>Subacute ischaemic stroke, dysphagia confirmed by penetration aspiration score &gt; 3 on videofluoroscopy.</p> <p><u>Exclusion:</u><br/>Participants with cognitive impairment, previous neurological disease.</p>  | Inspiratory and expiratory muscle training & standard swallowing therapy<br>Protocol: 5x5 breaths x 5 days per week x 4 weeks.<br>In addition, 1 hour of standard swallowing therapy. | Standard swallowing therapy (i.e. education, oral exercises & compensatory techniques).<br>1 hour per day x 5 days per week x 3 weeks.<br><br>(Control group number split in half for meta-analysis in this review) | Respiratory muscle function, severity of dysphagia (using PAS, VVST, DOSS), occurrence of respiratory complications (chest x-ray, fever)<br>Follow-up timepoints: 3 weeks, 3 months. |

|                                                                     |                                                                                                                                                                                                                            |                                                                                                                                                                                                                                                                                                                                                                                |                                                                                                                                                                                                                                                                                                  |                                                                                                                                                                                                                             |                                                                                                                                                                                                     |
|---------------------------------------------------------------------|----------------------------------------------------------------------------------------------------------------------------------------------------------------------------------------------------------------------------|--------------------------------------------------------------------------------------------------------------------------------------------------------------------------------------------------------------------------------------------------------------------------------------------------------------------------------------------------------------------------------|--------------------------------------------------------------------------------------------------------------------------------------------------------------------------------------------------------------------------------------------------------------------------------------------------|-----------------------------------------------------------------------------------------------------------------------------------------------------------------------------------------------------------------------------|-----------------------------------------------------------------------------------------------------------------------------------------------------------------------------------------------------|
| <p>Huang 2014 <sup>[33]</sup><br/>Taiwan</p>                        | <ul style="list-style-type: none"> <li>• RCT</li> <li>• 3 arm study</li> <li>• Randomisation method not clearly stated</li> <li>• Blinded outcome assessors</li> <li>• All pre-specified outcomes were reported</li> </ul> | <p>N= 29<br/>Mean age 67 years<br/>No significant group differences at baseline<br/><u>Inclusion:</u><br/>Acute stroke and dysphagia<br/><u>Exclusion:</u><br/>Aphasia or cognitive impairment, other neurological disease associated with dysphagia, head and neck surgery or radiotherapy, cardiac pacemaker, pneumonia or acute medical condition at time of enrolment.</p> | <p>Experimental group 1:<br/>Neuromuscular electrical stimulation (alone).<br/><br/>Experimental group 2:<br/>combined NMES &amp; standard therapy<br/><br/>Treatment protocol: 1 hour a day x 3 days per week x 10 sessions.<br/>(Data combined for meta-analysis as similar interventions)</p> | <p>Traditional swallowing therapy (i.e. chin tuck, head tilt / rotation, thermal tactile stimulation, supraglottic / Mendelsohn and effortful swallows.<br/><br/>Protocol: 3x60 minute sessions per week x 10 sessions.</p> | <p>Swallow function using penetration-aspiration score, functional oral intake scale and functional dysphagia scale.</p>                                                                            |
| <p>Hwang 2007 <sup>[34]</sup><br/>Single centre study<br/>Korea</p> | <ul style="list-style-type: none"> <li>• RCT</li> <li>• Computerised randomisation</li> <li>• Blinded outcome assessors</li> <li>• All pre-specified outcomes reported</li> </ul>                                          | <p>(N=33)<br/><u>Inclusion:</u><br/>Medical intensive care patients who were &gt;48 hours intubated.<br/><u>Exclusion:</u><br/>History of intubation or dysphagia, traumatic brain injury, cranial nerve injury or neuromuscular disease</p>                                                                                                                                   | <p>Pre-emptive swallowing stimulation and oral hygiene<br/>Protocol: 15 minutes x 2 daily, 6 days per week from 3<sup>rd</sup> day after intubation until videofluoroscopy post extubation</p>                                                                                                   | <p>No therapy, general oral hygiene only</p>                                                                                                                                                                                | <p>Swallowing parameters: oral transit time, oropharyngeal transit time, oropharyngeal swallowing efficiency, length of ICU stay, aspiration pneumonia, days to oral intake, time to discharge.</p> |
| <p>Jayakeran 2010 <sup>[35]</sup><br/>2 UK centres</p>              | <ul style="list-style-type: none"> <li>• RCT</li> <li>• Computerised randomisation</li> <li>• Blinded outcome assessors</li> <li>• All pre-specified outcomes reported</li> </ul>                                          | <p>N=28<br/>Mean age 75year<br/>Baseline characteristics similar across groups<br/><u>Inclusion:</u><br/>Anterior circulation infarct or haemorrhage &lt; 3 weeks<br/><u>Exclusion:</u></p>                                                                                                                                                                                    | <p>Pharyngeal electrical stimulation<br/>Protocol: 10 minutes per day x 3 days</p>                                                                                                                                                                                                               | <p>Sham stimulation<br/>Protocol: 10 minutes per day x 3 days</p>                                                                                                                                                           | <p>Aspiration post intervention<br/>Follow-up timepoint: 2 weeks</p>                                                                                                                                |

|                                                          |                                                                                                                                                                                                          |                                                                                                                                                                                                                                                                                                            |                                                                                                                                                                                                                                                                                           |                                                                                                                                                                                                           |                                                                                                                                  |
|----------------------------------------------------------|----------------------------------------------------------------------------------------------------------------------------------------------------------------------------------------------------------|------------------------------------------------------------------------------------------------------------------------------------------------------------------------------------------------------------------------------------------------------------------------------------------------------------|-------------------------------------------------------------------------------------------------------------------------------------------------------------------------------------------------------------------------------------------------------------------------------------------|-----------------------------------------------------------------------------------------------------------------------------------------------------------------------------------------------------------|----------------------------------------------------------------------------------------------------------------------------------|
|                                                          |                                                                                                                                                                                                          | Implanted cardiac devices; severe receptive aphasia; distorted oropharyngeal anatomy; dysphagia resulting from conditions other than hemispheric stroke                                                                                                                                                    |                                                                                                                                                                                                                                                                                           |                                                                                                                                                                                                           |                                                                                                                                  |
| Kumar 2011 <sup>[36]</sup><br>Single centre study<br>USA | <ul style="list-style-type: none"> <li>• Double blinded RCT</li> <li>• Randomisation method not clearly described</li> <li>• Intention to treat analysis</li> <li>• Blinded outcome assessors</li> </ul> | <p>N= 14<br/>Mean age 75years<br/>Unclear if baseline characteristics were similar</p> <p><u>Inclusion:</u><br/>Acute unilateral hemispheric infarct (24-168 hours)</p> <p><u>Exclusion:</u><br/>Cognitive impairment; pre-existing dysphagia; contraindications for tDCS.</p>                             | <p>Transcranial direct current stimulation</p> <p>Protocol: Treatment for 30 minutes x 5 consecutive days</p>                                                                                                                                                                             | <p>Sham stimulation and traditional swallowing exercises (i.e. approximately 60 effortful swallows and oral stimulation with lemon flavoured swabs).</p> <p>Protocol: 30 minutes x 5 consecutive days</p> | Swallowing impairment using dysphagia outcome and severity scale                                                                 |
| Li 2018 <sup>[37]</sup><br>China                         | <ul style="list-style-type: none"> <li>• RCT</li> <li>• 3 arm study</li> <li>• Randomisation software used</li> <li>• Blinded outcome assessors</li> </ul>                                               | <p>N=118<br/>Mean age 66 years<br/>No significant baseline group differences</p> <p><u>Inclusion:</u><br/>Acute stroke &gt; 3 months with dysphagia, able to elicit a pharyngeal swallow on videofluoroscopy</p> <p><u>Exclusion:</u><br/>Progressive and other neurological conditions; head and neck</p> | <p>Neuromuscular electrical stimulation (NMES).</p> <p>Treatment group 1: NMES &amp; traditional swallowing therapy<br/>Treatment group 2: NMES only.<br/>(Data combined in both groups as similar interventions used)</p> <p>Treatment protocol: 1 hour x 5 days per week x 4 weeks.</p> | <p>Traditional swallowing therapy (i.e oral trials with swallowing exercises).</p> <p>Protocol: 1 hour x 5 days per week x 4 weeks</p>                                                                    | Swallowing function (measured using Standardised Swallowing Assessment, sEMG values, oral transit and pharyngeal transit times). |

|                                                           |                                                                                                                                                                                                                   |                                                                                                                                                                                                                                                                                                 |                                                                                                                                                                                                              |                                                                                                                                                                                                          |                                                                                                                                                               |
|-----------------------------------------------------------|-------------------------------------------------------------------------------------------------------------------------------------------------------------------------------------------------------------------|-------------------------------------------------------------------------------------------------------------------------------------------------------------------------------------------------------------------------------------------------------------------------------------------------|--------------------------------------------------------------------------------------------------------------------------------------------------------------------------------------------------------------|----------------------------------------------------------------------------------------------------------------------------------------------------------------------------------------------------------|---------------------------------------------------------------------------------------------------------------------------------------------------------------|
|                                                           |                                                                                                                                                                                                                   | radiotherapy or surgery;<br>not able to elicit a<br>pharyngeal swallow                                                                                                                                                                                                                          |                                                                                                                                                                                                              |                                                                                                                                                                                                          |                                                                                                                                                               |
| Moon 2017 <sup>[38]</sup><br>Single centre<br>Korea       | <ul style="list-style-type: none"> <li>• RCT</li> <li>• Randomisation method not outlined</li> <li>• Blinded outcome assessment not clearly stated</li> <li>• All pre-specified outcomes were reported</li> </ul> | <p>N= 18<br/>Mean age 63 years<br/>No baseline group differences<br/><u>Inclusion:</u><br/>Acute stroke within 1 month<br/><u>Exclusion:</u><br/>Facial paralysis;<br/>tracheostomy;<br/>percutaneous gastrostomy.</p>                                                                          | <p>Expiratory muscle strength training (EMST) and traditional swallowing therapy<br/>Protocol: 30 minutes daily x 5 days per week for 4 weeks.<br/>7 breaths into EMST daily x 5 times per day x 4 weeks</p> | <p>Traditional swallowing therapy (i.e. orofacial exercises, Thermal-tactile stimulation, Mendelssohn, effortful and Massako manoeuvres).<br/><br/>Protocol: 30 minutes x 5 days per week x 4 weeks.</p> | <p>Swallow function using Functional dysphagia scale; Penetration Aspiration score; vallecular residue and pyriform sinus residue</p>                         |
| Moon 2018 <sup>[39]</sup><br>Single centre study<br>Korea | <ul style="list-style-type: none"> <li>• RCT</li> <li>• Randomisation software used</li> <li>• Blinded outcome assessors</li> <li>• All pre-specified outcomes were reported</li> </ul>                           | <p>N=16<br/>Mean age 63 years<br/>No significant baseline group differences<br/><u>Inclusion:</u><br/>Acute stroke<br/><u>Exclusion:</u><br/>Non-stroke patients with dysphagia; any cuts or pain in tongue during movement</p>                                                                 | <p>5 tongue presses x 6 repetitions x 30 minutes daily x 5 days per week x 8 weeks<br/>30 minutes standard therapy x 5 days per week x 8 weeks.</p>                                                          | <p>Standard swallowing therapy<br/>30 minutes per day x 5 days per week x 8 weeks</p>                                                                                                                    | <p>Maximum isometric tongue pressures of anterior and posterior tongue; Swallowing function using Mann assessment of swallowing ability; Quality of life.</p> |
| Park 2013 <sup>[40]</sup><br>Single centre study<br>Korea | <ul style="list-style-type: none"> <li>• RCT</li> <li>• Computerised randomisation</li> <li>• Blinded outcome assessors</li> <li>• All pre-specified outcomes reported</li> </ul>                                 | <p>N= 18<br/>Mean age 71 years<br/>No significant baseline group differences<br/>Similar baseline characteristics<br/><u>Inclusion:</u><br/>More than 1 month post stroke, videofluoroscopy confirmed dysphagia<br/><u>Exclusion:</u><br/>History of seizures, metal implants / pacemakers.</p> | <p>High frequency repetitive Transcranial magnetic stimulation (5Hz) at the contralesional intact cortex.<br/><br/>Treatment protocol: 10 minutes per day x 2 weeks</p>                                      | <p>Sham repetitive transcranial magnetic stimulation<br/><br/>Protocol: 10 minutes per day x 2 weeks</p>                                                                                                 | <p>Videofluoroscopy dysphagia score, penetration-aspiration score.</p>                                                                                        |

|                                                                         |                                                                                                                                                                               |                                                                                                                                                                                                                                                             |                                                                                                                                                                                                                                                                   |                                                                                                                                                                                                                                  |                                                                                                                                                       |
|-------------------------------------------------------------------------|-------------------------------------------------------------------------------------------------------------------------------------------------------------------------------|-------------------------------------------------------------------------------------------------------------------------------------------------------------------------------------------------------------------------------------------------------------|-------------------------------------------------------------------------------------------------------------------------------------------------------------------------------------------------------------------------------------------------------------------|----------------------------------------------------------------------------------------------------------------------------------------------------------------------------------------------------------------------------------|-------------------------------------------------------------------------------------------------------------------------------------------------------|
| <p>Park 2018 <sup>[41]</sup><br/>Single centre study<br/>Korea</p>      | <ul style="list-style-type: none"> <li>• RCT</li> <li>• Not clearly stated blinded outcome assessors were used</li> </ul>                                                     | <p>N=22<br/>Mean age 60 years<br/>No significant baseline group differences</p> <p>Inclusion:<br/>Stroke &lt; 12 months<br/>Exclusion:<br/>Secondary stroke, severe communication disorder, neck pain, unstable medical condition, head and neck cancer</p> | <p>Chin tuck against resistance and standard swallowing therapy.</p> <p>Protocol: 30 minutes x 5 days per week x 4 weeks combined with standard care (20 sessions).</p>                                                                                           | <p>Standard swallowing therapy (i.e. orofacial exercises, thermal tactile stimulation, compensatory manoeuvres).</p> <p>Protocol: 30 minutes x 5 days per week x 4 weeks combined with standard care (20 sessions).</p>          | <p>Swallow function using Functional Dysphagia Scale, Penetration-aspiration scale.</p>                                                               |
| <p>Park 2019 <sup>[42]</sup><br/>Single centre study<br/>Korea</p>      | <ul style="list-style-type: none"> <li>• RCT</li> <li>• Blinded outcome assessors were used</li> <li>• Computer generated randomisation</li> </ul>                            | <p>N = 24<br/>Mean age<br/>No significant baseline group differences</p> <p>Inclusion:<br/>Stroke confirmed by imaging; dysphagia confirmed by VFSS.<br/>Exclusion: Secondary stroke, severe communication disorder; neck pain or surgery</p>               | <p>Effortful Swallowing Training (EST) and traditional swallowing therapy.</p> <p>Protocol: 10 reps of EST in treatment session, 3 sessions per day, 5 days per week for 4 weeks. (90 sessions in total).</p> <p>Combined with Traditional swallowing therapy</p> | <p>Traditional swallowing therapy.</p> <p>30 minutes per day, 5 days per week for 4 weeks.</p> <p>Compensatory and therapeutic techniques such as orofacial exercises, thermal tactile stimulation, chin tuck and head tilt.</p> | <p>Tongue strength using Iowa Oral Performance Instrument.<br/>Swallow function using Videofluoroscopic Dysphagia Scale.</p>                          |
| <p>Suntrup 2015 <sup>[43]</sup><br/>Single centre study<br/>Germany</p> | <ul style="list-style-type: none"> <li>• RCT</li> <li>• Computer generated randomisation</li> <li>• Not clearly stated in study that blinded outcome assessor used</li> </ul> | <p>N=30<br/>Mean age 65 years<br/>No significant baseline group differences</p> <p>Inclusion:<br/>Acute stroke patients with tracheostomy and severe dysphagia<br/>Exclusion:<br/>Pre-existing dysphagia, implanted device</p>                              | <p>Pharyngeal electrical stimulation<br/>Protocol: 10 minutes stimulation x 3 consecutive days</p>                                                                                                                                                                | <p>Sham stimulation<br/>Protocol: 10 minutes x 3 consecutive days</p>                                                                                                                                                            | <p>Ability to decannulate, feeding status at discharge, length of intensive care stay, time from stimulation to discharge, modified Rankin scale.</p> |

|                                                                        |                                                                                                                                                                                    |                                                                                                                                                                                                                                                                                                                                                                 |                                                                                                                                                                              |                                                                                                                                                                                                                                                                                             |                                                                                   |
|------------------------------------------------------------------------|------------------------------------------------------------------------------------------------------------------------------------------------------------------------------------|-----------------------------------------------------------------------------------------------------------------------------------------------------------------------------------------------------------------------------------------------------------------------------------------------------------------------------------------------------------------|------------------------------------------------------------------------------------------------------------------------------------------------------------------------------|---------------------------------------------------------------------------------------------------------------------------------------------------------------------------------------------------------------------------------------------------------------------------------------------|-----------------------------------------------------------------------------------|
|                                                                        | <ul style="list-style-type: none"> <li>• Pre-specified outcomes reported</li> </ul>                                                                                                |                                                                                                                                                                                                                                                                                                                                                                 |                                                                                                                                                                              |                                                                                                                                                                                                                                                                                             |                                                                                   |
| Suntrup-Kreugar 2018 <sup>[44]</sup><br>Single centre study<br>Germany | <ul style="list-style-type: none"> <li>• RCT</li> <li>• Computerised randomisation</li> <li>• Blinded outcome assessors</li> <li>• Pre-specified outcomes all included</li> </ul>  | <p>N= 60<br/>Mean age 68 years<br/>No significant baseline group differences</p> <p><u>Inclusion:</u><br/>Acute stroke &gt; 24 hours post onset</p> <p><u>Exclusion:</u><br/>Pre-existing dysphagia; seizure history; previous or need for skull surgery; metallic implants; tracheal cannula; unstable medical condition; unable to give informed consent.</p> | <p>Transcranial direct current stimulation and traditional swallowing therapy.</p> <p>Protocol: 20 minutes per day x 4 days of stimulation, combined with standard care.</p> | <p>Sham stimulation and traditional swallowing therapy</p> <p>Protocol: 30 seconds stimulation &amp; electrodes then left in position for remainder of session.</p> <p>Swallowing exercises (i.e. dry / effortful swallows with oral trials) for 20 minutes a day x 4 consecutive days.</p> | <p>Swallow function using Dysphagia Severity Rating Score; diet at discharge.</p> |
| Vasant 2016 <sup>[45]</sup><br>3 centres in UK                         | <ul style="list-style-type: none"> <li>• RCT</li> <li>• Computer generated randomisation</li> <li>• Analysis by Intention to treat</li> <li>• Blinded outcome assessors</li> </ul> | <p>N=36<br/>Mean age 71 years<br/>Baseline characteristics are similar</p> <p><u>Inclusion:</u><br/>new onset dysphagia within 6 weeks of stroke; medically stable.</p> <p><u>Exclusion:</u><br/>Advanced dementia, history of dysphagia, pacemaker or implanted cardiac device, structural abnormalities,</p>                                                  | <p>Pharyngeal electrical stimulation &amp; standard swallowing therapy</p> <p>Protocol: 10 minutes x 3 consecutive days</p>                                                  | <p>Sham stimulation &amp; standard swallowing therapy.</p> <p>Protocol: 10 minutes x 3 consecutive days</p>                                                                                                                                                                                 | <p>Death, swallow function, dysphagia.</p> <p>Follow-up timepoint: 3 months</p>   |
| Wu 2011 <sup>[46]</sup><br>China                                       | <ul style="list-style-type: none"> <li>• RCT</li> <li>• 3 arm study</li> <li>• Random number table</li> </ul>                                                                      | <p>N=229<br/>Mean age 68 years<br/>No significant baseline group differences</p>                                                                                                                                                                                                                                                                                | <p>Treatment group 1:<br/>Acupuncture</p>                                                                                                                                    | <p>Standard rehabilitation training (i.e. tailored treatment to include tongue exercises, thermal-</p>                                                                                                                                                                                      | <p>Swallowing function, quality of life.</p>                                      |

|                                                           |                                                                                                                                                                                                            |                                                                                                                                                                                                                                                                                                                                               |                                                                                                                                                                                                                               |                                                                                                                                                                                                           |                                                                                                                                                       |
|-----------------------------------------------------------|------------------------------------------------------------------------------------------------------------------------------------------------------------------------------------------------------------|-----------------------------------------------------------------------------------------------------------------------------------------------------------------------------------------------------------------------------------------------------------------------------------------------------------------------------------------------|-------------------------------------------------------------------------------------------------------------------------------------------------------------------------------------------------------------------------------|-----------------------------------------------------------------------------------------------------------------------------------------------------------------------------------------------------------|-------------------------------------------------------------------------------------------------------------------------------------------------------|
|                                                           | <ul style="list-style-type: none"> <li>Blinded assessors not clearly state</li> </ul>                                                                                                                      | <p>Inclusion:<br/>Acute stroke &lt; 2 weeks post onset</p> <p>Exclusion:<br/>Respiratory failure, previous dysphagia, cannot adhere to treatment, adverse events during treatment</p>                                                                                                                                                         | <p>Treatment group 2:<br/>Acupuncture &amp; rehabilitation training.<br/>Protocol: 30 minutes treatment x 5 days per week x 4 weeks.<br/>(Data from both treatment groups were combined for meta-analysis in this review)</p> | tactile stimulation and breathing exercises).                                                                                                                                                             |                                                                                                                                                       |
| Xia 2011 <sup>[47]</sup><br>China                         | <ul style="list-style-type: none"> <li>RCT</li> <li>3 arm study</li> <li>Randomisation not clearly stated</li> <li>Blinded outcome assessors used</li> <li>Pre-specified outcomes were reported</li> </ul> | <p>N=120<br/>Mean age 66 years<br/>No significant baseline group differences</p> <p><u>Inclusion:</u><br/>Acute stroke confirmed by imaging; dysphagia present; being able to consent</p> <p><u>Exclusion:</u><br/>Pulmonary disease; unable to cooperate, &lt;40 years</p>                                                                   | <p>Treatment group 1:<br/>Neuromuscular electrical stimulation (NMES)</p> <p>Treatment group 2:<br/>NMES &amp; standard swallowing therapy</p> <p>Treatment protocol: 30 minutes x 2 daily, 5 days per week x 4 weeks.</p>    | Standard swallowing therapy (i.e. swallow exercises and oral trials).                                                                                                                                     | Swallow function using Videofluoroscopy swallowing scale, Standardised swallowing assessment; swallowing quality of life; muscle function using sEMG. |
| Yang 2012 <sup>[48]</sup><br>Single centre study<br>Korea | <ul style="list-style-type: none"> <li>RCT</li> <li>Method of randomisation not clearly stated</li> <li>Blinded outcome assessors used</li> </ul>                                                          | <p>N=16<br/>Mean age 70 years<br/>No significant baseline group differences</p> <p><u>Inclusion:</u><br/>Videofluoroscopy confirmed dysphagia post stroke.</p> <p><u>Exclusion:</u><br/>Bilateral brain lesion, implanted cardiac device, history of seizure, severe language disturbance, cognitive impairment, history of alcohol abuse</p> | <p>Anodal transcranial direct current stimulation combined with standard care</p> <p>Treatment protocol: 20 minutes x 5 days per week x 2 weeks.</p>                                                                          | Sham stimulation and standard swallowing therapy (i.e. Mendelsohn, supraglottic, effortful, thermal tactile stimulation and oromotor exercises). Protocol: 30 minute session x 5 days per week x 2 weeks. | Swallow function as measured by Functional Dysphagia Scale                                                                                            |

## Appendix F: Table of excluded studies.

| Study                                                                                                                                                                                                                                                                                                                                  | Reason for exclusion                                                                                                                                                                                       |
|----------------------------------------------------------------------------------------------------------------------------------------------------------------------------------------------------------------------------------------------------------------------------------------------------------------------------------------|------------------------------------------------------------------------------------------------------------------------------------------------------------------------------------------------------------|
| 1. Byeon H, Koh HW. Comparison of treatment effect of neuromuscular electrical stimulation and thermal-tactile stimulation on patients with sub-acute dysphagia caused by stroke. <i>Journal Physical Therapy Science</i> 2016; 28: 1809-1812.                                                                                         | Author contacted and confirmed study was completed in a step-down rehabilitation unit, not acute hospital setting.                                                                                         |
| 2. Byeon, H. Combined Effects of NMES and Mendelsohn Maneuver on the Swallowing Function and Swallowing–Quality of Life of Patients with Stroke-Induced Sub-Acute Swallowing Disorders. <i>Biomedicines</i> 2020, 8, 12.                                                                                                               | The study was designed using a non-equivalent control group pretest–posttest design, therefore not an RCT.                                                                                                 |
| 3. Carnaby G, LaGorio L, Silliman S, Crary M. Exercise-based swallowing intervention (McNeill Dysphagia Therapy) with adjunctive NMES to treat dysphagia post-stroke: A double-blind placebo-controlled trial. <i>Journal of Oral Rehabilitation</i> 2020; 47: 501-510. NCT01279824.                                                   | This study was conducted with sub-acute stroke patients in rehabilitation hospital setting.                                                                                                                |
| 4. Clave P. Sensory Neuromodulation Protocol for the Treatment of post-stroke oropharyngeal dysphagia (FIS 2014). NCT 04052178                                                                                                                                                                                                         | Author response confirmed this trial was conducted in an outpatient setting.                                                                                                                               |
| 5. Chiang CF, Lin MT, Hsiao MY, Yeh YC, Liang YC, Wang TG. Comparative Efficacy of Noninvasive Neurostimulation Therapies for Acute and Subacute Poststroke Dysphagia: A Systematic Review and Network Meta-analysis. <i>Arch Phys Med Rehabil.</i> 2019;100(4):739-750.e4. doi:10.1016/j.apmr.2018.09.117, 10.1016/j.apmr.2018.09.117 | Systematic review not RCT. All included studies in review have been reviewed by this review’s authors for possible inclusion.                                                                              |
| 6. Chang L, He P-L, Zhou Z-Z, Li Y-H. Efficacy observation of dysphagia after acute stroke treated with acupuncture and functional electrical stimulation. <i>Chinese Acupuncture and Moxibustion</i> 2014;34(8):737-740.                                                                                                              | Chinese publication translated by native Chinese Researcher (QUB). Study excluded as outcomes specified by this review were not reported                                                                   |
| 7. Chen Q, Guo J-H, Feng X, Zhou Y, Zhang Y, Hu X-Y. The effectiveness of a multi-disciplinary intervention for deglutition disorders in elderly inpatients. <i>The Journal of Nursing</i> 2018;65(4):73-83. [DOI: doi.org/10.6224/JN.201808_65(4).10]                                                                                 | Chinese publication translated by native Chinese researcher (QUB). Intervention delivered on both inpatient and outpatient basis and outcome data for inpatients not analysed separately in study results. |
| 8. De Pippo KL, Holas MA, Reding MJ, Mandel FS, Lesser ML. Dysphagia therapy following stroke. <i>Neurology</i> 1994; 44: 1655-1660.                                                                                                                                                                                                   | No control group and participants treated in rehabilitation hospital.                                                                                                                                      |
| 9. Denk D-M, Kaider A. Videoendoscopic biofeedback: a simple method to improve the efficacy of swallowing rehabilitation of patients after head and neck surgery. <i>ORL</i> 1997; 59: 100-105.                                                                                                                                        | No control group and intervention delivered in both inpatient and outpatient settings.                                                                                                                     |



|                                                                                                                                                                                                                                                                                                                                                                                                             |                                                                                                                                       |
|-------------------------------------------------------------------------------------------------------------------------------------------------------------------------------------------------------------------------------------------------------------------------------------------------------------------------------------------------------------------------------------------------------------|---------------------------------------------------------------------------------------------------------------------------------------|
| 10. Diniz PB, Vanin G, Xavier R, Parente MA. Reduced incidence of aspiration with spoon-thick consistency in stroke patients. <i>Nutrition in Clinical Practice</i> 2009; 24(3): 414-418.                                                                                                                                                                                                                   | Irrelevant intervention used (i.e. two different fluid consistencies being compared in study)                                         |
| 11. Erfmann. Effects of expiratory muscle strength training (EMST) on oropharyngeal dysphagia in subacute stroke patients: a randomised controlled trial. <i>Journal of Clinical Practice in Speech-Language Pathology</i> 2017; 19(2): 111-111.                                                                                                                                                            | Review article of Park et al 2016 (which is included in studies awaiting classification in this review)                               |
| 12. Ershov VI, Zdvizhkova SV, Gonchar-Zaikin AP, et al. [The treatment efficacy of disturbed swallowing function in patients with ischemic stroke and neurogenous dysphagia in the intensive care unit]. [in Russian] <i>Zh Nevrol Psikhiatr Im S S Korsakova</i> . 2019;119(7):35-40. doi:10.17116/jnevro201911907135, 10.17116/jnevro201911907135                                                         | Irrelevant intervention used (i.e. diet modification / fluid thickening)                                                              |
| 13. Feng X-G, Hao W-J, Ding Z, Sui Q, Guo H, Fu J.. Clinical study of Tongyan Spray for post stroke dysphagia patients: a randomised controlled trial. <i>Chinese Journal of Integrated Traditional and Western Medicine</i> 2012; 18(5): 345-349. [DOI: DOI: 10.1007/s11655-012-1140-9]                                                                                                                    | Irrelevant intervention used (i.e. herbal spray/ pharmaceutical intervention)                                                         |
| 14. Gallas S, Marie JP, Leroi AM, Verin E. Sensory transcutaneous electrical stimulation improves post-stroke dysphagic patients. <i>Dysphagia</i> 2010; 25: 291-297. [DOI: DOI 10.1007/s00455-009-9259.                                                                                                                                                                                                    | No control group and no randomisation                                                                                                 |
| 15. Goulding R, Bakheit AMO. Evaluation of the benefits of monitoring fluid thickness in the dietary management of dysphagic stroke patients. <i>Clinical Rehabilitation</i> 2000; 14: 119-124.                                                                                                                                                                                                             | Irrelevant intervention used (i.e. two different diet modifications being compared in study)                                          |
| 16. Hamdy S, Jilani S, Price V, Parker C, Hall N, Power M. Modulation of human swallowing behaviour by thermal and chemical stimulation in health and after brain injury. <i>Neurogastroenterology Motility</i> 2003; 15: 69-77.                                                                                                                                                                            | Irrelevant design (within study design) and assessing swallow function in a series of assessments rather than testing an intervention |
| 17. Hägglund P, Hägg M, Wester P, Jäghagen EL. Effects of oral neuromuscular training on swallowing dysfunction among older people in intermediate care—a cluster randomised, controlled trial, <i>Age and Ageing</i> , Volume 48, Issue 4, July 2019, Pages 533–540, <a href="https://doi-org.queens.ezpl.qub.ac.uk/10.1093/ageing/afz042">https://doi-org.queens.ezpl.qub.ac.uk/10.1093/ageing/afz042</a> | Irrelevant study setting: conducted in intermediate-care units not acute hospital setting.                                            |
| 18. Hernandez et al. Swallowing and nutritional treatment on oropharyngeal patients. NCT04132271                                                                                                                                                                                                                                                                                                            | Irrelevant intervention: Ongoing trial testing diet modification in elderly dysphagia population                                      |

|                                                                                                                                                                                                                                                                                                                                            |                                                                                                                                          |
|--------------------------------------------------------------------------------------------------------------------------------------------------------------------------------------------------------------------------------------------------------------------------------------------------------------------------------------------|------------------------------------------------------------------------------------------------------------------------------------------|
| <p>19. Hong Z, Yulin W, Qin Y. Influence of diet nursing care on the prognosis of patients with poststroke dysphagia. Chinese Nursing Research 2011;25(1):211-213. [DOI: doi:10.3969/j.issn.1009-6493.2011.03.012].</p>                                                                                                                    | <p>Chinese publication translated by native Chinese researcher (QUB). Irrelevant intervention used (i.e. diet / fluid modification).</p> |
| <p>20. Huina C, Zhihui G. Application of double Yellow Decoction in oral nursing of patients with dysphagia after stroke. Chinese Nursing Research 2016;30(2):194-195. [DOI: 10.3969/j.issn.1009-6493.2016.02.024].</p>                                                                                                                    | <p>Irrelevant intervention for this review (i.e. herbal remedy used).</p>                                                                |
| <p>21. Jakobsen D, Poulsen I, Schultheiss C, et al The effect of intensified nonverbal facilitation of swallowing on dysphagia after severe acquired brain injury: A randomised controlled pilot study. NeuroRehabilitation. 2019; 45(4): 525-536. <a href="https://doi.org/10.3233/NRE-192901">https://doi.org/10.3233/NRE-192901</a></p> | <p>Irrelevant study setting: study conducted in neurorehabilitation hospital setting.</p>                                                |
| <p>22. Jang KW, Lee SJ, Kim SB, Lee KW, Lee JH &amp; Park JG. Effects of mechanical inspiration and expiration exercise on velopharyngeal incompetence in subacute stroke patients. Journal of rehabilitation medicine 2019; 51: 97-102. <a href="https://doi.org/10.2340/16501977-2506">https://doi.org/10.2340/16501977-2506</a></p>     | <p>Irrelevant study setting: study conducted in rehabilitation centre in South Korea.</p>                                                |
| <p>23. Kasprisin AT, Clumeck H, Nino-Murcia M. The efficacy of rehabilitative management of dysphagia. Dysphagia 1989; 4: 48-52. [DOI: <a href="https://doi.org/10.1007/BF02407403">https://doi.org/10.1007/BF02407403</a>].</p>                                                                                                           | <p>Irrelevant study design as retrospective and not randomised trial.</p>                                                                |
| <p>24. Khedr EM, Ahmed MA, Fathy N, Rothwell JC. Therapeutic trial of repetitive transcranial magnetic stimulation after acute ischemic stroke. Neurology 2005; 65: 466-468.</p>                                                                                                                                                           | <p>Irrelevant intervention for this review</p>                                                                                           |
| <p>25. Khedr EM, Abo-Elfetoh N, Rothwell JC. Treatment of post-stroke dysphagia with repetitive transcranial magnetic stimulation. Acta Neurol Scand 2009; 119: 155-161.</p>                                                                                                                                                               | <p>Irrelevant outcomes not related to those specified in this review</p>                                                                 |
| <p>26. Khedr EM, Abo-Elfetoh N. Therapeutic role of rTMS on recovery of dysphagia in patients with lateral medullary syndrome and brainstem infarction. Journal Neurology Neurosurgery and Psychiatry 2010; 81(495-499).</p>                                                                                                               | <p>Irrelevant outcomes not related to those specified in this review</p>                                                                 |

|                                                                                                                                                                                                                                                                                                                                                                        |                                                                                                                                                          |
|------------------------------------------------------------------------------------------------------------------------------------------------------------------------------------------------------------------------------------------------------------------------------------------------------------------------------------------------------------------------|----------------------------------------------------------------------------------------------------------------------------------------------------------|
| <p>27. Kiger M, Brown CS, Watkins L. Dysphagia management: an analysis of patient outcomes using Vitalstim Therapy compared to traditional swallow therapy. <i>Dysphagia</i> 2006; 21(4): 243-253.</p>                                                                                                                                                                 | <p>Irrelevant study setting (i.e. rehabilitation and outpatient settings)</p>                                                                            |
| <p>28. Kim H-H, Park J-S. Efficacy of modified chin tuck against resistance exercise using hand-free device for dysphagia in stroke survivors: A randomised controlled trial. <i>J Oral Rehabil.</i> 2019;46:1042–1046. <a href="https://doi.org/10.1111/joor.12837">https://doi.org/10.1111/joor.12837</a></p>                                                        | <p>Irrelevant study setting: rehabilitation setting with stroke patients &gt; 6 months post onset.</p>                                                   |
| <p>29. Koestenberger M, Neuwersch S, Hoefner E. <i>et al.</i> A Pilot Study of Pharyngeal Electrical Stimulation for Orally Intubated ICU Patients with Dysphagia. <i>Neurocrit Care</i> 2020; 32: 532–538. <a href="https://doi.org/10.1007/s12028-019-00780-x">https://doi.org/10.1007/s12028-019-00780-x</a></p>                                                    | <p>ICU study. Irrelevant study design as historical control group used, not RCT design.</p>                                                              |
| <p>30. Kotz T, Federman AD, Kao J, Milman L, Packer S, Lopez-Prieto C, Forsythe K, Genden EM. Prophylactic swallowing exercises in patients with head and neck cancer undergoing chemoradiation. <i>Arch Otolaryngol Head Neck Surg</i> 2012; 138(4): 376-382.</p>                                                                                                     | <p>Irrelevant study setting. Author contacted and confirmed intervention was tested in outpatient setting only</p>                                       |
| <p>31. Kraaijenga SAC, van der Molen L, Jacobi I, Hamming-Vrieze O, Hilgers FJM, van den Brekel MWM. Prospective clinical study on long-term swallowing function and voice quality in advanced head and neck cancer patients treated with concurrent chemoradiotherapy and preventive swallowing exercises. <i>Eur Arch Otorhinolaryngol</i> 2015; 272: 3521-3531.</p> | <p>Addresses long term follow up data relating to Kotz et al 2012 study (which is included in this table and was excluded due to irrelevant setting)</p> |
| <p>32. de Lama Lazzara G, Lazarus C, Logemann J. Impact of thermal stimulation on the triggering on the swallow reflex. <i>Dysphagia</i> 1986; 1: 73-77.</p>                                                                                                                                                                                                           | <p>Irrelevant study design – no control group.</p>                                                                                                       |
| <p>33. Lee K, Kim S, Lee J, Lee S, Park J, Jang K. Effects of Neuromuscular Electrical Stimulation for Masseter Muscle on Oral Dysfunction After Stroke. <i>Ann Rehabil Med.</i> 2019; 43(1):11-18. DOI: <a href="https://doi.org/10.5535/arm.2019.43.1.11">https://doi.org/10.5535/arm.2019.43.1.11</a></p>                                                           | <p>Irrelevant study setting: Cardiovascular centre in South Korea.</p>                                                                                   |
| <p>34. Leelamanit V, Limsakul C, Geater A. Synchronised electrical stimulation in treating pharyngeal dysphagia. <i>Laryngoscope</i> 2002; 112: 2204-2210.</p>                                                                                                                                                                                                         | <p>Irrelevant study design – prospective study with no control group</p>                                                                                 |

|                                                                                                                                                                                                                                                                                                                                                                            |                                                                                                                                                                                                                     |
|----------------------------------------------------------------------------------------------------------------------------------------------------------------------------------------------------------------------------------------------------------------------------------------------------------------------------------------------------------------------------|---------------------------------------------------------------------------------------------------------------------------------------------------------------------------------------------------------------------|
| <p>35. Li Li L, Li Y, Huang R, Yin J, Shen Y, Shi J. The value of adding transcutaneous neuromuscular electrical stimulation (VitalStim R) to traditional therapy for post-stroke dysphagia: a randomised controlled trial. <i>European Journal of Physical and Rehabilitation Medicine</i> 2015; 51(1): 71-78.</p>                                                        | <p>Duplicate of more recent study Li et al 2018 which is included in review</p>                                                                                                                                     |
| <p>36. Liaw MY, Hsu CH, Leong CP, Liao CY, Wang LY, Lu CH, Lin MC. Respiratory muscle training in stroke patients with respiratory muscle weakness, dysphagia, and dysarthria - a prospective randomized trial. <i>Medicine</i> 2020; 99:10 (e19337)<br/><a href="http://doi:10.1097/MD.0000000000019337">http://doi:10.1097/MD.0000000000019337</a></p>                   | <p>Author response received to confirm that study was conducted in rehabilitation setting of tertiary hospital and not acute hospital setting.</p>                                                                  |
| <p>37. Logemann JA, Gensler G, Robbins JA, Lindblad AS, Brandt D, Hind JA, Kosek S, Dikeman K, Kazandjian M, Gramigna GD, Lundy D, McGarvey-Toler S, Miller Gardner PJ. A randomised study of three interventions for aspiration of thin liquids in patients with dementia or Parkinson's disease. <i>Journal Speech Language Hearing Research</i> 2008;51(1):173-183.</p> | <p>Irrelevant intervention (i.e. different fluid modifications) and irrelevant setting (i.e. inpatients and participants from residential home setting and inpatient data was not analysed separately in study)</p> |
| <p>38. Logemann J, Rademaker A, Pauloski B, Kelly A, Stangl-McBreen C, Antinoja J, Grande B, Farquharson J, Kern M, Easterling C, Shaker R. A randomised study comparing the Shaker exercise with traditional therapy: a preliminary study. <i>Dysphagia</i> 2009; 24: 403-411. [DOI: DOI 10.1007/s00455-009-9217-0]</p>                                                   | <p>Irrelevant study setting – all participants were outpatients</p>                                                                                                                                                 |
| <p>39. Malik SN, Khan MSG, Ehssan F, Quarra-Tul-Ain. Effectiveness of swallow maneuvers, thermal stimulation and combination both in treatment of patients with dysphagia using functional outcome swallowing scale. <i>Biomedical Research India</i> 2017; 28(4): 1479-1482.</p>                                                                                          | <p>Irrelevant study setting – all participants were outpatients</p>                                                                                                                                                 |
| <p>40. Martin A, Ortega O, Roca M, Arus M, Clave P. Effect of a minimal-massive intervention in hospitalised older patients with oropharyngeal dysphagia: a proof of concept study. <i>Journal Nutrition Health Aging</i> 2018; 22(6): 739-747.</p>                                                                                                                        | <p>Irrelevant study design. Historical controls, not randomised trial design.</p>                                                                                                                                   |
| <p>41. Ortega O, Rofes L, Martin A, Arreola V, Lopez I, Clave P. A comparative study between two sensory stimulation strategies after two weeks treatment on older patients with oropharyngeal dysphagia. <i>Dysphagia</i> 2016; 31: 706-716.</p>                                                                                                                          | <p>Irrelevant study setting. Author contacted and confirmed that all participants were treated on an outpatient basis.</p>                                                                                          |

|                                                                                                                                                                                                                                                                                                                                                            |                                                                                                                                      |
|------------------------------------------------------------------------------------------------------------------------------------------------------------------------------------------------------------------------------------------------------------------------------------------------------------------------------------------------------------|--------------------------------------------------------------------------------------------------------------------------------------|
|                                                                                                                                                                                                                                                                                                                                                            |                                                                                                                                      |
| 42. Park J-W, Kim Y, Oh J-C, Lee H-J. Effortful swallowing training combined with electrical stimulation in post-stroke dysphagia: a randomised controlled study. <i>Dysphagia</i> 2012; 27: 521-527.                                                                                                                                                      | Irrelevant study outcomes not related to those specified in this review                                                              |
| 43. Park J-S, Oh D-H, Hwang N-K, Lee J-H (a). Effects of neuromuscular electrical stimulation combined with effortful swallowing on post-stroke oropharyngeal dysphagia: a randomised controlled trial. <i>Journal of Oral Rehabilitation</i> 2016; 43:426-434.                                                                                            | Irrelevant study setting as participants treated in rehabilitation centre.                                                           |
| 44. Park JS, Lee G, Jung YJ. Effects of Game-Based Chin Tuck against Resistance Exercise Vs Head-Lift Exercise in Patients with Dysphagia After Stroke: An Assessor-Blind, Randomized Controlled Trial. <i>Journal of Rehabilitation Medicine</i> 2019; 51(10): 749–754. <a href="http://doi:10.2340/16501977-2603">http://doi:10.2340/16501977-2603</a> . | Irrelevant study setting: study conducted in rehabilitation centre in South Korea.                                                   |
| 45. Restivo DA, Casabona A, Centonze D, Marchese-Ragona R, Maimone D, Pavone A. Pharyngeal electrical stimulation for dysphagia associated with multiple sclerosis: a pilot study. <i>Brain stimulation</i> 2013; 6: 418-423.                                                                                                                              | Irrelevant study setting. Author contacted and confirmed all participants treated on an outpatient basis                             |
| 46. Reyes A, Cruickshank T, Nosaka K, Ziman M. Respiratory muscle training on pulmonary and swallowing function in patients with Huntington's disease: a pilot randomised controlled trial. <i>Clinical Rehabilitation</i> 2015;29(10):961-973. [DOI:10.1177/0269215514564087]                                                                             | Irrelevant study setting. Participants completed outpatient, home-based programme                                                    |
| 47. Rofes L, Arreola V, Martin A, Clave P. Effect of oral piperine on the swallow response of patients with oropharyngeal dysphagia. <i>Journal Gastroenterology</i> 2014; 49: 1517-1523.                                                                                                                                                                  | Irrelevant study setting. Author contacted and confirmed all participants in study treated on outpatient basis.                      |
| 48. Shigematsu T, Fujishima I, Ohno K. Transcranial direct current stimulation improves swallowing function in stroke patients. <i>Neurorehabilitation and Neural Repair</i> 2013; 27(4): 363-369. [DOI: 10.1177/1545968312474116].                                                                                                                        | Irrelevant study setting. Trial completed in rehabilitation facility.                                                                |
| 49. Steele CM, Bayley MT, Peladeau-Pigeon M, Nagy A, Namasivayam AM, Stokely SL, Wolkin T. A randomised trial comparing two tongue-pressure resistance training protocols for post-stroke dysphagia. <i>Dysphagia</i> 2016; 31:452-461.                                                                                                                    | Irrelevant study setting. Author contacted and confirmed all participants treated in rehabilitation facility and not acute hospital. |

|                                                                                                                                                                                                                                                                                                                                                                                                                         |                                                                                                                                                                   |
|-------------------------------------------------------------------------------------------------------------------------------------------------------------------------------------------------------------------------------------------------------------------------------------------------------------------------------------------------------------------------------------------------------------------------|-------------------------------------------------------------------------------------------------------------------------------------------------------------------|
| <p>50. Terre R, Mearin F. Effectiveness of chin down posture to prevent tracheal aspiration in dysphagia secondary to acquired brain injury. A videofluoroscopy study. <i>Neurogastroenterol Motility</i> 2012; 24: 414-e206. [DOI: doi: 10.1111/j.1365-2982.2011.01869.x]</p>                                                                                                                                          | <p>Irrelevant study setting. Participants treated in rehabilitation facility.</p>                                                                                 |
| <p>51. Verin E, Leroi AM. Poststroke dysphagia rehabilitation by repetitive transcranial magnetic stimulation: a noncontrolled pilot study. <i>Dysphagia</i> 2009; 24: 204-210.</p>                                                                                                                                                                                                                                     | <p>Irrelevant study design (i.e. noncontrolled pilot study and not RCT)</p>                                                                                       |
| <p>52. Wall LR, Kularatna S, Ward EC. <i>et al.</i> Economic Analysis of a Three-Arm RCT Exploring the Delivery of Intensive, Prophylactic Swallowing Therapy to Patients with Head and Neck Cancer During (Chemo) Radiotherapy. <i>Dysphagia</i> 34, 627–639 (2019). <a href="https://doi-org.queens.ezpl.qub.ac.uk/10.1007/s00455-018-9960-1">https://doi-org.queens.ezpl.qub.ac.uk/10.1007/s00455-018-9960-1</a></p> | <p>Irrelevant study setting: study conducted with outpatients at tertiary oncology unit</p>                                                                       |
| <p>53. Weidong L, Wayne PM, Davis RB, Buring JE, Li H, Macklin EA, Lorch JH, Burke E, Haddad TC, Goguen LA, Rosenthal DS, Tishler RB, Posner MR, Haddad RI. Acupuncture for chemoradiation therapy-related dysphagia in head and neck cancer: a pilot randomised sham-controlled trial. <i>The Oncologist</i> 2016; 21: 1522-1529.</p>                                                                                  | <p>Irrelevant study setting. Author contacted and confirmed all participants were treated on an outpatient basis only.</p>                                        |
| <p>54. Whelan K. Inadequate fluid intakes in dysphagic acute stroke. <i>Clinical Nutrition</i> 2001; 20(5): 423-428</p>                                                                                                                                                                                                                                                                                                 | <p>Irrelevant intervention (i.e. two different fluid modifications compared)</p>                                                                                  |
| <p>55. Wong ISY, Ng KF, Tsang HWH. Acupuncture for dysphagia following stroke: A systematic review. <i>European Journal of Integrative medicine</i> 2012; 4: e141-e150.</p>                                                                                                                                                                                                                                             | <p>Systematic review so irrelevant study design. One study in this review was conducted in an acute setting and included in this review (i.e. Wu et al 2011).</p> |
| <p>56. Wu, C., Xu, Y., Wang, T. <i>et al.</i> Effects of a swallowing and oral care intervention for patients following endotracheal extubation: a pre- and post-intervention study. <i>Crit Care</i> 2019; 23: 350, 1-8 <a href="https://doi-org.queens.ezpl.qub.ac.uk/10.1186/s13054-019-2623-2">https://doi-org.queens.ezpl.qub.ac.uk/10.1186/s13054-019-2623-2</a></p>                                              | <p>Irrelevant study design: pre- and post-intervention study with historical controls conducted at a tertiary medical centre in Taiwan.</p>                       |
| <p>57. Xia W, Zheng C, Zhu S, Tang Z. Does the addition of specific acupuncture to standard swallowing training improve outcomes in patients with dysphagia after stroke: a randomised controlled trial. <i>Clinical Rehabilitation</i> 2016; 3: 237-246. [DOI: 10.1177/0269215515578698]</p>                                                                                                                           | <p>Irrelevant study setting. Both inpatients and outpatients included in this study but data was not analysed separately.</p>                                     |

|                                                                                                                                                                                                                                                                                                                                                                               |                                                                                               |
|-------------------------------------------------------------------------------------------------------------------------------------------------------------------------------------------------------------------------------------------------------------------------------------------------------------------------------------------------------------------------------|-----------------------------------------------------------------------------------------------|
| <p>58. Yoon JS, Sung YJ. Effects of lower jaw muscle strength training on the swallowing function in swallowing disorder of patients. <i>Journal of Rehabilitation Research</i> 2013; 17: 393-407</p>                                                                                                                                                                         | <p>Irrelevant study setting: study conducted in rehabilitation setting.</p>                   |
| <p>59. Zhang C, Zheng X, Lu R, Yun W, Yun H, Zhou X. Repetitive transcranial magnetic stimulation in combination with neuromuscular electrical stimulation for treatment of post-stroke dysphagia. <i>Journal of International Medical Research</i> 2019; 47(2): 662–672. <a href="https://doi.org/10.1177/0300060518807340">https://doi.org/10.1177/0300060518807340</a></p> | <p>Irrelevant study setting: study conducted in a neurorehabilitation outpatient setting.</p> |
| <p>60. Zheng L, Li Y, Liu Y. The individualised rehabilitation interventions for dysphagia: a multidisciplinary case control study of acute stroke patients. <i>International Journal of Clinical and Experimental Medicine</i> 2014; 7(10): 3789-3794.</p>                                                                                                                   | <p>Irrelevant outcomes not related to those specified in this review</p>                      |

## Appendix G: Table of unclassified and ongoing studies

|                                                                                                                                                               |                                                                                                                                                       |
|---------------------------------------------------------------------------------------------------------------------------------------------------------------|-------------------------------------------------------------------------------------------------------------------------------------------------------|
| 1. Bulow et al 2008 <sup>[57]</sup>                                                                                                                           | Await author response to confirm setting of study as unclear if acute hospital or rehabilitation setting                                              |
| 2. Carnaby-Mann et al NCT01279824 <sup>[58]</sup>                                                                                                             | Author contacted requesting trial data / findings as unable to find related publication and no results submitted on clinicaltrials.gov                |
| 3. De Fraga et al 2017 <sup>[59]</sup>                                                                                                                        | Await author response to confirm setting of study as unclear if acute hospital or rehabilitation setting                                              |
| 4. El-Tamawy et al 2015 <sup>[60]</sup>                                                                                                                       | Await author response to confirm study setting as intervention described as home programme which suggests an outpatient setting                       |
| 5. Eom et al 2017 <sup>[61]</sup>                                                                                                                             | Unpublished data on incidence of aspiration post intervention (i.e. PAS > 5 score) was requested – response awaited.                                  |
| 6. Gao et al 2017 <sup>[62]</sup>                                                                                                                             | Unpublished data on incidence of aspiration post intervention (i.e. PAS >5 score) was requested – response awaited.                                   |
| 7. Kim et al 2017 <sup>[63]</sup>                                                                                                                             | Unpublished data on incidence of aspiration post intervention (i.e. PAS > 5 score) was requested – response awaited.                                  |
| 8. Lim et al 2009 <sup>[64]</sup>                                                                                                                             | Await author response to confirm with acute hospital or rehabilitation setting as not clearly stated in study.                                        |
| 9. Park et al 2016 (b) <sup>[65]</sup>                                                                                                                        | Unpublished data on incidence of aspiration post intervention (i.e. PAS > 5 score) was requested – response awaited.                                  |
| 10. Simonelli et al 2019 <sup>[66]</sup>                                                                                                                      | Await author response to confirm study setting as study describes recruiting subacute stroke patients from IRCCS Santa Lucia Foundation, Rome, Italy. |
| 11. Menna et al RBR-9829jK <sup>[50]</sup>                                                                                                                    | Ongoing study – no results posted on clinicaltrials.gov and no response from author when contacted regarding trial results.                           |
| 12. Brodsky et al PRESIDE trial NCT02442102 <sup>[51]</sup>                                                                                                   | Ongoing intensive care study testing early dysphagia intervention during intubation with acute respiratory distress syndrome population               |
| 13. Jakob et al PHINEST trial NCT03840395 <sup>[52]</sup>                                                                                                     | Ongoing trial testing pharyngeal electrical stimulation during intubation in ICU.                                                                     |
| 14. Dziewas et al. Pharyngeal Electrical Stimulation for the treatment of Post-Extubation Dysphagia in acute stroke NCT02470078 <sup>[53]</sup>               | Ongoing clinical trial. No publication of results available yet. Authors contacted for trial results – response awaited.                              |
| 15. Hamdy et al The utility of cerebellar transcranial magnetic stimulation in the neurorehabilitation of dysphagia after stroke. NCT03274947 <sup>[54]</sup> | Ongoing trial testing TMS as dysphagia treatment for stroke patients.                                                                                 |
| 16. Brief and intensive therapy for dysphagia in patients with head and neck cancer. NCT03755921 <sup>[55]</sup>                                              | Ongoing trial dysphagia treatment in head and neck cancer patients.                                                                                   |
| 17. Restivo et al. tDCS for dysphagia associated to brainstem stroke NCT04308733 <sup>[56]</sup>                                                              | Ongoing trial testing transcranial direct current stimulation in stroke patients                                                                      |



## **Appendix H: Members of Expert Advisory Panel meeting June 2019**

Professor Martin Brodsky, Johns Hopkins University, US.

Professor Louise Rose, Kings College, London.

Dr. Anna Miles, Auckland University, New Zealand.

Dr. Jacqui McRae, Consultant Speech / Language Therapist, St. George's NHS Trust, London.

Dr. Alastair Proudfoot, Consultant Cardiac Intensivist, St. Bart's Trust, London.

Dr. Anna-Liisa Sutt, Clinical Research Speech/Language Therapist, St. Bart's Trust, London.

Dr. Bronwen Connolly, Consultant Clinical Research Physiotherapist & NIHR Clinical Trials Fellow, Guy's and St. Thomas' Trust, London.

## Appendix I: Risk of bias within studies and judgement tables

|                       | Random sequence generation (selection bias) | Allocation concealment (selection bias) | Blinding of outcome assessment (detection bias) | Incomplete outcome data (attrition bias) | Selective reporting (reporting bias) | Other bias | Blinding of participants (performance bias) | Blinding of personnel (performance bias) |
|-----------------------|---------------------------------------------|-----------------------------------------|-------------------------------------------------|------------------------------------------|--------------------------------------|------------|---------------------------------------------|------------------------------------------|
| Bath 2016             | +                                           | ?                                       | +                                               | +                                        | +                                    | -          | +                                           | -                                        |
| Carnaby 2006          | +                                           | +                                       | +                                               | +                                        | +                                    | +          | -                                           | -                                        |
| Chen 2016             | +                                           | +                                       | +                                               | ?                                        | +                                    | +          | -                                           | -                                        |
| Du 2016               | +                                           | +                                       | +                                               | +                                        | +                                    | +          | +                                           | -                                        |
| Dziewas 2018          | +                                           | +                                       | +                                               | +                                        | +                                    | ?          | ?                                           | -                                        |
| Guillen-Sola 2017 (1) | +                                           | +                                       | +                                               | +                                        | +                                    | +          | ?                                           | -                                        |
| Guillen-Sola 2017 (2) | +                                           | +                                       | +                                               | ?                                        | +                                    | +          | ?                                           | ?                                        |
| Huang 2014            | ?                                           | ?                                       | +                                               | +                                        | +                                    | +          | -                                           | ?                                        |
| Hwang 2007            | +                                           | +                                       | +                                               | +                                        | +                                    | +          | +                                           | -                                        |
| Jayasekeran 2010      | +                                           | ?                                       | +                                               | +                                        | +                                    | +          | +                                           | -                                        |
| Kumar 2011            | ?                                           | ?                                       | +                                               | +                                        | ?                                    | +          | +                                           | ?                                        |
| Li 2018               | +                                           | +                                       | +                                               | ?                                        | +                                    | +          | -                                           | ?                                        |
| Moon 2017             | ?                                           | ?                                       | ?                                               | +                                        | +                                    | +          | -                                           | -                                        |
| Moon 2018             | +                                           | +                                       | +                                               | +                                        | +                                    | +          | -                                           | -                                        |
| Park 2013             | +                                           | +                                       | +                                               | +                                        | +                                    | +          | +                                           | -                                        |
| Park 2018             | +                                           | ?                                       | ?                                               | +                                        | +                                    | +          | -                                           | -                                        |
| Park 2019             | +                                           | +                                       | +                                               | +                                        | +                                    | ?          | +                                           | -                                        |
| Suntrup 2015          | +                                           | +                                       | ?                                               | +                                        | +                                    | +          | ?                                           | ?                                        |
| Suntrup-Kreuger 2018  | +                                           | ?                                       | +                                               | +                                        | +                                    | +          | +                                           | -                                        |
| Vasant 2016           | +                                           | +                                       | +                                               | +                                        | +                                    | ?          | +                                           | -                                        |
| Wu 2011               | +                                           | +                                       | ?                                               | +                                        | +                                    | +          | ?                                           | ?                                        |
| Xia 2011              | ?                                           | ?                                       | +                                               | +                                        | +                                    | ?          | ?                                           | ?                                        |
| Yang 2012             | ?                                           | ?                                       | +                                               | +                                        | +                                    | +          | +                                           | ?                                        |

Bath 2016 [27]

| <b>Bias</b>                                       | <b>Authors' judgement</b> | <b>Support for judgement</b>                                                                                                                                                                                                                                                                                                                                                                                                                             |
|---------------------------------------------------|---------------------------|----------------------------------------------------------------------------------------------------------------------------------------------------------------------------------------------------------------------------------------------------------------------------------------------------------------------------------------------------------------------------------------------------------------------------------------------------------|
| <b>Random Sequence Generation</b>                 | Low risk                  | Investigators entered baseline and follow-up data into a commercial database (Rave, Medidata Solutions, Inc) linked to a randomization list (Quantics Consulting, Ltd). The data were checked to confirm the patient's eligibility, and the system then assigned a participant to treatment with active PES or sham PES with allocation 1:1. Allocation was by randomly permuted blocks.                                                                 |
| <b>Allocation Concealment</b>                     | Unclear                   | This is not clearly stated in study.                                                                                                                                                                                                                                                                                                                                                                                                                     |
| <b>Blinding Outcome Assessors</b>                 | Low                       | A member of the central research team (S.H.), who was masked to treatment assignment, validated and categorized investigator-reported serious adverse events, including cause-specific deaths.                                                                                                                                                                                                                                                           |
| <b>Incomplete reporting outcome data</b>          | Low                       | Flow of patients through the trial: consented, 195; screened with VFS, 181; randomized, 162; treatment attempted, 152; treated, 141; treated with VFS at 2 weeks, 126; all 3 treatments received with VFS at 2 weeks, 123; treated with VFS at 12 weeks. All patients accounted for in trial.                                                                                                                                                            |
| <b>Selective reporting outcome data</b>           | Low                       | All pre-specified outcomes are reported                                                                                                                                                                                                                                                                                                                                                                                                                  |
| <b>Other biases</b>                               | High                      | P.M. Bath received honoraria for work as the Chief Investigator and for consultancy. S. Hamdy is the inventor of PES and has stock in Phagenesis. J. Love was an employee of Phagenesis. Institutions using P. M. Bath, D. Cohen, H.K. Iversen, R. Dziewas, V. Woisard, and P. Clavé received per-patient fees for recruitment. P.M. Bath, P. Scutt, D. Cohen, H.K. Iversen, R. Dziewas, and V. Woisard received travel expenses for attending meetings. |
| <b>Blinding of participants during treatment</b>  | Low                       | Patients, but not the treating researcher, were masked to treatment assignment. This is stated in the study.                                                                                                                                                                                                                                                                                                                                             |
| <b>Blinding of personnel delivering treatment</b> | High                      | It is stated in study treating researcher was not masked to treatment assignment.                                                                                                                                                                                                                                                                                                                                                                        |

Carnaby 2006 [28]

| <b>Bias</b>                       | <b>Authors' judgement</b> | <b>Support for judgement</b>                                                                                                                                                                       |
|-----------------------------------|---------------------------|----------------------------------------------------------------------------------------------------------------------------------------------------------------------------------------------------|
| <b>Random Sequence Generation</b> | Low                       | Randomisation was undertaken by use of a block randomisation technique. The treatment allocation was based on a computer-generated random numbers list generated with the SPSS statistical package |

|                                                   |      |                                                                                                                                                                                                                                                                                                                                                                                               |
|---------------------------------------------------|------|-----------------------------------------------------------------------------------------------------------------------------------------------------------------------------------------------------------------------------------------------------------------------------------------------------------------------------------------------------------------------------------------------|
| <b>Allocation Concealment</b>                     | Low  | The randomisation schedule was held in the trial office, remote from the study environment. After clinical assessment by the study speech pathologist (JP), eligible patients were informed about the trial and, after providing informed consent, were randomly assigned to one of three treatment options by means of a telephone call to the trial office by the study speech pathologist. |
| <b>Blinding Outcome Assessors</b>                 | Low  | Outcome was assessed by an independent speech pathologist (GC), who was unaware of the treatment allocation, every month for 6 months after randomisation.                                                                                                                                                                                                                                    |
| <b>Incomplete reporting outcome data</b>          | Low  | 60 participants died by 6 month follow up period.<br>Only 3 drop outs were reported across 3 intervention groups by 6 month analysis period.                                                                                                                                                                                                                                                  |
| <b>Selective reporting outcome data</b>           | Low  | All prespecified outcomes were reported                                                                                                                                                                                                                                                                                                                                                       |
| <b>Other biases</b>                               | Low  | None identified in this study                                                                                                                                                                                                                                                                                                                                                                 |
| <b>Blinding of participants during treatment</b>  | High | Patients were aware of their treatment allocation, this is clearly stated in the text.                                                                                                                                                                                                                                                                                                        |
| <b>Blinding of personnel delivering treatment</b> | High | All people involved in the study were unaware of the treatment allocation, apart from the patients and the study speech pathologist who treated the patients assigned to the high-intensity and low-intensity groups.                                                                                                                                                                         |

Chen 2016 <sup>[29]</sup>

| <b>Bias</b>                                       | <b>Authors' judgement</b> | <b>Support for judgement</b>                                                                                                                                                                                                                                                                                                |
|---------------------------------------------------|---------------------------|-----------------------------------------------------------------------------------------------------------------------------------------------------------------------------------------------------------------------------------------------------------------------------------------------------------------------------|
| <b>Random Sequence Generation</b>                 | Low                       | Consecutive patients were randomly assigned to standard rehabilitation care with or without acupuncture (1:1 allocation ratio). Randomization was computer-generated by independent research staff using software, and the generated list of random numbers was placed into sequentially numbered, opaque, sealed envelopes |
| <b>Allocation Concealment</b>                     | Low                       | Random numbers placed into sequentially numbered, opaque, sealed envelopes                                                                                                                                                                                                                                                  |
| <b>Blinding Outcome Assessors</b>                 | Low                       | All of the allopathic medical staff, rehabilitation therapists, outcome assessors, and data analysts were blinded to group assignments.                                                                                                                                                                                     |
| <b>Incomplete reporting outcome data</b>          | Unclear                   | 5 participants lost to follow up. Not all participants were given VFSS examination.                                                                                                                                                                                                                                         |
| <b>Selective reporting outcome data</b>           | Low                       | All pre-specified outcomes were recorded in this study.                                                                                                                                                                                                                                                                     |
| <b>Other biases</b>                               | Low                       | None identified                                                                                                                                                                                                                                                                                                             |
| <b>Blinding of participants during treatment</b>  | High                      | Participants were informed if they would receive acupuncture or not in this study - so blinding not possible.                                                                                                                                                                                                               |
| <b>Blinding of personnel delivering treatment</b> | High                      | specialized acupuncturists were informed to do acupuncture for assigned patients.                                                                                                                                                                                                                                           |

Du 2016 <sup>[30]</sup>

| <b>Bias</b>                                       | <b>Authors' judgement</b> | <b>Support for judgement</b>                                                                                                                                               |
|---------------------------------------------------|---------------------------|----------------------------------------------------------------------------------------------------------------------------------------------------------------------------|
| <b>Random Sequence Generation</b>                 | Low                       | Treatment allocations were kept in sequentially numbered sealed opaque envelopes                                                                                           |
| <b>Allocation Concealment</b>                     | Low                       | Sealed envelopes only opened at time of enrolment.                                                                                                                         |
| <b>Blinding Outcome Assessors</b>                 | Low                       | These measures were evaluated by a trained neurologist who was blinded to the subjects' group allocation throughout.                                                       |
| <b>Incomplete reporting outcome data</b>          | Low                       | 2 participants lost to follow-up                                                                                                                                           |
| <b>Selective reporting outcome data</b>           | Low                       | All outcomes measures reported at all time points: post intervention, 1 month, 2 months and 3 months post intervention.                                                    |
| <b>Other biases</b>                               | Low                       | None identified in study                                                                                                                                                   |
| <b>Blinding of participants during treatment</b>  | Low                       | All patients were blinded to the type of treatment they received.                                                                                                          |
| <b>Blinding of personnel delivering treatment</b> | High                      | Magnetic stimulation was performed by one investigator who was not involved in clinical assessment, follow-up of patients, or data analysis but was aware of intervention. |

Dziewas 2018 <sup>[31]</sup>

| <b>Bias</b>                              | <b>Authors' judgement</b> | <b>Support for judgement</b>                                                                                                                                                                                                                                                                                              |
|------------------------------------------|---------------------------|---------------------------------------------------------------------------------------------------------------------------------------------------------------------------------------------------------------------------------------------------------------------------------------------------------------------------|
| <b>Random Sequence Generation</b>        | Low                       | Patients were randomly assigned to receive PES or sham treatment (1:1) via a computerised interactive wireless randomisation system (IWRS) that applied randomisation stratified by study site in blocks of four patients per site.                                                                                       |
| <b>Allocation Concealment</b>            | Low                       | Each trial site, the randomisation procedure was obtained from the IWRS by a group of investigators responsible only for treatment application                                                                                                                                                                            |
| <b>Blinding Outcome Assessors</b>        | Low                       | All other investigators and health-care workers not involved in treatment were masked.                                                                                                                                                                                                                                    |
| <b>Incomplete reporting outcome data</b> | Low                       | Full flow chart adhering to CONSORT guidelines was included in this study. All drop out / attrition rates included and data for both randomised and open label section of study included.                                                                                                                                 |
| <b>Selective reporting outcome data</b>  | Low                       | All primary and secondary outcomes were reported in full in both randomised and open label parts of this study.                                                                                                                                                                                                           |
| <b>Other biases</b>                      | Unclear                   | Role of the funding source <b>The study was sponsored by Phagenesis Ltd. The sponsor was involved in the design of the study, and contributed to data interpretation and the writing of the manuscript. It also financially compensated sites for data collection, a clinical research organisation (FAKKEL, Belgium; for |

|                                                   |         |                                                                                                                                                                                                                                                                                                                                                                                                                                                     |
|---------------------------------------------------|---------|-----------------------------------------------------------------------------------------------------------------------------------------------------------------------------------------------------------------------------------------------------------------------------------------------------------------------------------------------------------------------------------------------------------------------------------------------------|
|                                                   |         | further details see appendix) for study management and source data verification, and University Medical Centre Utrecht (Utrecht, Netherlands) and Cytel Inc (Cambridge, MA, USA) for data analysis. Interim analyses were reviewed by the IDSMB without involvement of the sponsor or the steering committee. All authors had full access to all data. The corresponding author had final responsibility for the decision to submit for publication |
| <b>Blinding of participants during treatment</b>  | Unclear | As with many device studies, masking of patients could not be guaranteed because, in principle, patients could feel whether PES was applied. In all other aspects, PES and the sham condition were kept as similar as possible. PES or sham stimulation had to be commenced within 24 h of randomisation                                                                                                                                            |
| <b>Blinding of personnel delivering treatment</b> | High    | This was not possible as the personnel delivering treatment had to be aware of whether to deliver PES or sham stimulation to patient groups. This was not possible as the personnel delivering treatment had to be aware of whether to deliver PES or sham stimulation to patient groups.                                                                                                                                                           |

Guillan-Sola 2017 (1) <sup>[32]</sup>

| <b>Bias</b>                                       | <b>Authors' judgement</b> | <b>Support for judgement</b>                                                                                                                                                                                                                                        |
|---------------------------------------------------|---------------------------|---------------------------------------------------------------------------------------------------------------------------------------------------------------------------------------------------------------------------------------------------------------------|
| <b>Random Sequence Generation</b>                 | Low                       | Used a computer-generated randomization list                                                                                                                                                                                                                        |
| <b>Allocation Concealment</b>                     | Low                       | Randomisation was performed independently by a collaborator blinded to patient identity                                                                                                                                                                             |
| <b>Blinding Outcome Assessors</b>                 | Low                       | rehabilitation specialist, who also was blinded to study group assignments, carried out all outcome assessments.                                                                                                                                                    |
| <b>Incomplete reporting outcome data</b>          | Low                       | Twenty-one patients were not able to perform the respiratory and/or swallowing assessment after the 3-week intervention. Eleven of these patients were lost to 3-month follow-up and no clinical information was available from their medical records for analysis. |
| <b>Selective reporting outcome data</b>           | Low                       | All prespecified outcomes were reported in this study                                                                                                                                                                                                               |
| <b>Other biases</b>                               | Low                       | None identified                                                                                                                                                                                                                                                     |
| <b>Blinding of participants during treatment</b>  | Unclear                   | This is not clearly stated in the study                                                                                                                                                                                                                             |
| <b>Blinding of personnel delivering treatment</b> | High                      | Personnel undertaking treatment would have been aware of allocation                                                                                                                                                                                                 |

Guillan-Sola 2017 (2) <sup>[32]</sup>

| <b>Bias</b> | <b>Authors' judgement</b> | <b>Support for judgement</b> |
|-------------|---------------------------|------------------------------|
|-------------|---------------------------|------------------------------|

|                                                   |         |                                                                                                                                                                                                                                                                    |
|---------------------------------------------------|---------|--------------------------------------------------------------------------------------------------------------------------------------------------------------------------------------------------------------------------------------------------------------------|
| <b>Random Sequence Generation</b>                 | Low     | Randomisation using a computer-generated randomization list                                                                                                                                                                                                        |
| <b>Allocation Concealment</b>                     | Low     | Randomisation was performed independently by a collaborator blinded to patient identity                                                                                                                                                                            |
| <b>Blinding Outcome Assessors</b>                 | Low     | rehabilitation specialist, who also was blinded to study group assignments, carried out all outcome assessments.                                                                                                                                                   |
| <b>Incomplete reporting outcome data</b>          | Unclear | Twenty-one patients were not able to perform the respiratory and/or swallowing assessment after the 3-week intervention. Eleven of these patients were lost to 3-month follow-up and no clinical information was available from their medical records for analysis |
| <b>Selective reporting outcome data</b>           | Low     | All prespecified outcomes were reported in this study                                                                                                                                                                                                              |
| <b>Other biases</b>                               | Low     | None identified                                                                                                                                                                                                                                                    |
| <b>Blinding of participants during treatment</b>  | Unclear | This is not clearly stated in study                                                                                                                                                                                                                                |
| <b>Blinding of personnel delivering treatment</b> | Unclear | Not clearly stated in study                                                                                                                                                                                                                                        |

Huang 2014 <sup>[33]</sup>

| <b>Bias</b>                                      | <b>Authors' judgement</b> | <b>Support for judgement</b>                                                                                                                                                              |
|--------------------------------------------------|---------------------------|-------------------------------------------------------------------------------------------------------------------------------------------------------------------------------------------|
| <b>Random Sequence Generation</b>                | Unclear                   | We randomly divided the patients into 3 groups. The method of randomisation used in this study is not clearly stated.                                                                     |
| <b>Allocation Concealment</b>                    | Unclear                   | This is not clearly stated in this study.                                                                                                                                                 |
| <b>Blinding Outcome Assessors</b>                | Low                       | Both the 8-point PAS and FDS were interpreted and scored before and after each therapy by another well-experienced speech-language therapist who was also blinded to all 3 interventions. |
| <b>Incomplete reporting outcome data</b>         | Low                       | All randomised participants were accounted for in analysis of outcomes post interventions.                                                                                                |
| <b>Selective reporting outcome data</b>          | Low                       | All pre-specified outcomes in methods section were included in analysis / results section.                                                                                                |
| <b>Other biases</b>                              | Low                       | There were no other obvious sources of bias when reviewing this study. It was supported by grants from the National Science Council, Taiwan.                                              |
| <b>Blinding of participants during treatment</b> | High                      | It does not clearly state that participants were blinded to treatment in this study as interventions were different blinding was not possible.                                            |

|                                                   |         |                                                                                                                                                                                                                                                                                              |
|---------------------------------------------------|---------|----------------------------------------------------------------------------------------------------------------------------------------------------------------------------------------------------------------------------------------------------------------------------------------------|
| <b>Blinding of personnel delivering treatment</b> | Unclear | Blinding of personnel is not clearly stated in this study. As interventions were different (Electrical vs traditional exercises). It does seem different therapists delivered therapy to the different treatment groups but not clear if they knew which was experimental vs control groups. |
|---------------------------------------------------|---------|----------------------------------------------------------------------------------------------------------------------------------------------------------------------------------------------------------------------------------------------------------------------------------------------|

Hwang 2007 <sup>[34]</sup>

| <b>Bias</b>                                       | <b>Authors' judgement</b> | <b>Support for judgement</b>                                                                                                                                                                                            |
|---------------------------------------------------|---------------------------|-------------------------------------------------------------------------------------------------------------------------------------------------------------------------------------------------------------------------|
| <b>Random Sequence Generation</b>                 | Low                       | Randomization and allocation was done using a random assignments generator (Medusa, solution@randombots.com, Long Beach, CA, USA)                                                                                       |
| <b>Allocation Concealment</b>                     | Low                       | None of the patients could see the pre-emptive swallowing stimulation done to other patients because of temporal screening                                                                                              |
| <b>Blinding Outcome Assessors</b>                 | Low                       | video-fluoroscopic swallow study examiner and assessor did not know whether a patient was assigned into the experimental or the control group. This was tool used during outcome assessment in this study.              |
| <b>Incomplete reporting outcome data</b>          | Low                       | Results tables do report outcomes for all participants in control and experimental groups. No Consort flow chart available in publication.                                                                              |
| <b>Selective reporting outcome data</b>           | Low                       | No evidence of selected outcomes being reported. All swallowing and health related parameters identified in methods section were reported in results of this study.                                                     |
| <b>Other biases</b>                               | Low                       | None identified in study                                                                                                                                                                                                |
| <b>Blinding of participants during treatment</b>  | Low                       | The text clearly states that patients did not know whether a patient was assigned into the experimental or control group. Both experimental and control groups received standard care: oral hygiene and tooth brushing. |
| <b>Blinding of personnel delivering treatment</b> | High                      | Only the one occupational therapist who performed pre-emptive swallowing stimulation knew the group assignments                                                                                                         |

Jayaskeran 2010 <sup>[35]</sup>

| <b>Bias</b>                       | <b>Authors' judgement</b> | <b>Support for judgement</b>                                                                                                                                                   |
|-----------------------------------|---------------------------|--------------------------------------------------------------------------------------------------------------------------------------------------------------------------------|
| <b>Random Sequence Generation</b> | Low                       | Randomization was undertaken by local software (Minim programme, Department of Bioengineering, Salford Royal Hospital NHS Trust, Salford, UK) using a process of minimization. |



|                                                   |         |                                                                                                                                                                   |
|---------------------------------------------------|---------|-------------------------------------------------------------------------------------------------------------------------------------------------------------------|
|                                                   |         |                                                                                                                                                                   |
| <b>Allocation Concealment</b>                     | Unclear | Process of allocation concealment is not described in the study.                                                                                                  |
| <b>Blinding Outcome Assessors</b>                 | Low     | Aspiration scores were recorded by 2 speech and language therapists, blinded to the intervention. This was the main outcome assessment tool used after treatment. |
| <b>Incomplete reporting outcome data</b>          | Low     | 3 drop outs from original number of 31 participants randomised to intervention vs control groups.                                                                 |
| <b>Selective reporting outcome data</b>           | Low     | All pre-specified outcomes were reported in this trial.                                                                                                           |
| <b>Other biases</b>                               | Low     | None identified in this study                                                                                                                                     |
| <b>Blinding of participants during treatment</b>  | Low     | Participants blinded to the intervention.                                                                                                                         |
| <b>Blinding of personnel delivering treatment</b> | High    | Personnel delivering PES aware of treatment groups                                                                                                                |

Kumar 2011<sup>[36]</sup>

| <b>Bias</b>                                       | <b>Authors' judgement</b> | <b>Support for judgement</b>                                                                                                                                                                                                                                          |
|---------------------------------------------------|---------------------------|-----------------------------------------------------------------------------------------------------------------------------------------------------------------------------------------------------------------------------------------------------------------------|
| <b>Random Sequence Generation</b>                 | Unclear                   | Patients were randomized to receive either anodal tDCS or sham stimulation to the unaffected hemisphere using simple randomization. No further details given on randomisation method, whether computer generated software was used etc.                               |
| <b>Allocation Concealment</b>                     | Unclear                   | Not clearly stated in study                                                                                                                                                                                                                                           |
| <b>Blinding Outcome Assessors</b>                 | Low                       | They were all evaluated by speech and language pathologists specializing in dysphagia (C.W. and C.F.) who were blinded to study allocation and rated swallowing impairments using a validated dysphagia scale, Dysphagia Outcome and Severity scale (DOSS). 20 DOSS   |
| <b>Incomplete reporting outcome data</b>          | Low                       | No exclusions. All patients randomised to treatment groups were analysed post intervention.                                                                                                                                                                           |
| <b>Selective reporting outcome data</b>           | Unclear                   | All pre-planned outcomes were reported in results section of study. However videofluoroscopy ratings that were taken for 7 patients (to achieve DOSS score) were not reported on in detail in results section, though all DOSS scores were included in results table. |
| <b>Other biases</b>                               | Low                       | None identified                                                                                                                                                                                                                                                       |
| <b>Blinding of participants during treatment</b>  | Low                       | Clearly stated in methods section 'patients were blinded to their stimulation allocations'                                                                                                                                                                            |
| <b>Blinding of personnel delivering treatment</b> | Unclear                   | This is not clearly stated in study                                                                                                                                                                                                                                   |

Li 2018<sup>[37]</sup>

| <b>Bias</b>                                       | <b>Authors' judgement</b> | <b>Support for judgement</b>                                                                                                                                                         |
|---------------------------------------------------|---------------------------|--------------------------------------------------------------------------------------------------------------------------------------------------------------------------------------|
| <b>Random Sequence Generation</b>                 | Low                       | Participants were randomly divided into groups after stratification using minimising software.                                                                                       |
| <b>Allocation Concealment</b>                     | Low                       | After signing consent, each participant received a sealed envelope indicating her group assignment.                                                                                  |
| <b>Blinding Outcome Assessors</b>                 | Low                       | It is clearly stated in study that assessors were blinded to participants' treatment assignments.                                                                                    |
| <b>Incomplete reporting outcome data</b>          | Unclear                   | 17 participants dropped out of a total of 135 randomised. The drop outs were during treatment and before final outcome assessments were completed. (12% attrition rate)              |
| <b>Selective reporting outcome data</b>           | Low                       | All pre-specified outcomes were reported in this study.                                                                                                                              |
| <b>Other biases</b>                               | Low                       | None identified                                                                                                                                                                      |
| <b>Blinding of participants during treatment</b>  | High                      | Participants were made aware of which experimental group they were assigned to before treatment commenced. As interventions were different in each group, blinding was not possible. |
| <b>Blinding of personnel delivering treatment</b> | Unclear                   | It is not clearly stated in study.                                                                                                                                                   |

Moon 2017 <sup>[38]</sup>

| <b>Bias</b>                                       | <b>Authors' judgement</b> | <b>Support for judgement</b>                                                                                                                                                             |
|---------------------------------------------------|---------------------------|------------------------------------------------------------------------------------------------------------------------------------------------------------------------------------------|
| <b>Random Sequence Generation</b>                 | Unclear                   | All participants were randomly assigned to either an experimental group (n=9) or a control group (n=9). The authors don't specify how randomisation was completed, what method was used. |
| <b>Allocation Concealment</b>                     | Unclear                   | Allocation concealment is not clearly specified in the study                                                                                                                             |
| <b>Blinding Outcome Assessors</b>                 | Unclear                   | Blinding of outcome assessors is not clearly stated in this study.                                                                                                                       |
| <b>Incomplete reporting outcome data</b>          | Low                       | All participants analysed were accounted for in outcome data. No drop out rates in this study.                                                                                           |
| <b>Selective reporting outcome data</b>           | Low                       | All pre-specified outcomes were analysed and reported as planned.                                                                                                                        |
| <b>Other biases</b>                               | Low                       | There are no conflicts of interest declared with this study and no other sources of bias detected.                                                                                       |
| <b>Blinding of participants during treatment</b>  | High                      | As the treatments in each group were different and no placebo used then blinding would not be possible.                                                                                  |
| <b>Blinding of personnel delivering treatment</b> | High                      | It is not possible to blind personnel in this intervention as both treatment groups received different treatments.                                                                       |

Moon 2018 <sup>[39]</sup>

| <b>Bias</b>                                       | <b>Authors' judgement</b> | <b>Support for judgement</b>                                                                                                                                                                                                                                                                                    |
|---------------------------------------------------|---------------------------|-----------------------------------------------------------------------------------------------------------------------------------------------------------------------------------------------------------------------------------------------------------------------------------------------------------------|
| <b>Random Sequence Generation</b>                 | Low                       | Of the 118 individuals, 19 were included and allocated randomly to either the TPSAT group or the control group using random allocation software ( <a href="http://randomization.com/">http://randomization.com/</a> ). After the preassessment, random allocation was performed by an independent staff member. |
| <b>Allocation Concealment</b>                     | Low                       | For allocation concealment, sealed envelopes sequentially numbered and opaque were used. The envelopes were kept in a location distinct from the assessment place and were not available to the assessor or the data analyst.                                                                                   |
| <b>Blinding Outcome Assessors</b>                 | Low                       | A sealed envelope was signed, dated, and opened by the allocation examiner immediately before the intervention, and only in the absence of the assessor and the data analyst. This comment illustrates that assessors were not aware of group allocation when doing baseline or post treatment assessments.     |
| <b>Incomplete reporting outcome data</b>          | Low                       | A study flow chart is provided accounting for all participants recruited, randomised and analysed and any drop outs in the study and reasons for exclusions pre randomisation and reasons given why participants dropped out.                                                                                   |
| <b>Selective reporting outcome data</b>           | Low                       | All outcomes that were pre-specified were reported in the analysis section of this study, within and between groups. Non-significant results were also discussed in results section along side any more positive findings.                                                                                      |
| <b>Other biases</b>                               | Low                       | None identified                                                                                                                                                                                                                                                                                                 |
| <b>Blinding of participants during treatment</b>  | High                      | As the treatments were different, participants would have known if they were receiving the experimental intervention. It is not clearly stated in this study that participants were blinded.                                                                                                                    |
| <b>Blinding of personnel delivering treatment</b> | High                      | It was not possible to blind personnel in this study as one occupational therapist delivered the intervention to participants in both groups.                                                                                                                                                                   |

Park 2013 <sup>[40]</sup>

| <b>Bias</b>                       | <b>Authors' judgement</b> | <b>Support for judgement</b>                    |
|-----------------------------------|---------------------------|-------------------------------------------------|
| <b>Random Sequence Generation</b> | Low                       | Computer generated randomisation sequence used. |

|                                                   |      |                                                                             |
|---------------------------------------------------|------|-----------------------------------------------------------------------------|
| <b>Allocation Concealment</b>                     | Low  | Automated assignment system used.                                           |
| <b>Blinding Outcome Assessors</b>                 | Low  | Clearly stated that blinded outcome assessors are used.                     |
| <b>Incomplete reporting outcome data</b>          | Low  | None lost to follow up.                                                     |
| <b>Selective reporting outcome data</b>           | Low  | All pre-specified outcomes reported.                                        |
| <b>Other biases</b>                               | Low  | None identified                                                             |
| <b>Blinding of participants during treatment</b>  | Low  | Clearly states in study that participants are blinded.                      |
| <b>Blinding of personnel delivering treatment</b> | High | Personnel delivering the intervention were not blinded to treatment groups. |

Park 2018 <sup>[41]</sup>

| <b>Bias</b>                                       | <b>Authors' judgement</b> | <b>Support for judgement</b>                                                                                                                                                                                                                                                     |
|---------------------------------------------------|---------------------------|----------------------------------------------------------------------------------------------------------------------------------------------------------------------------------------------------------------------------------------------------------------------------------|
| <b>Random Sequence Generation</b>                 | Low                       | Not clear how block randomisation was done                                                                                                                                                                                                                                       |
| <b>Allocation Concealment</b>                     | Unclear                   | This is not clearly stated in the study.                                                                                                                                                                                                                                         |
| <b>Blinding Outcome Assessors</b>                 | Unclear                   | It is not clearly stated in this study that outcome assessors were blinded or that assessors were different personnel to those delivering the intervention.                                                                                                                      |
| <b>Incomplete reporting outcome data</b>          | Low                       | In total, 22 participants completed this study. Three participants dropped out prior to the follow-up because of discharge. All numbers recruited, randomised and analysed have been accounted for. All outcomes to be reported were reported in analysis section of this study. |
| <b>Selective reporting outcome data</b>           | Low                       | All pre-specified outcomes to be measured in this study, as detailed in methods section, were accounted for in results section.                                                                                                                                                  |
| <b>Other biases</b>                               | Low                       | None identified                                                                                                                                                                                                                                                                  |
| <b>Blinding of participants during treatment</b>  | High                      | As interventions were different, it is not possible to blind participants to group allocation in this study.                                                                                                                                                                     |
| <b>Blinding of personnel delivering treatment</b> | High                      | All interventions were completed by one therapist so blinding to intervention type was not conducted.                                                                                                                                                                            |

Park 2019 <sup>[42]</sup>

| <b>Bias</b>                       | <b>Authors' judgement</b> | <b>Support for judgement</b>         |
|-----------------------------------|---------------------------|--------------------------------------|
| <b>Random Sequence Generation</b> | Low                       | Computer randomisation software used |

|                                                   |         |                                                                                                                                                                                                                          |
|---------------------------------------------------|---------|--------------------------------------------------------------------------------------------------------------------------------------------------------------------------------------------------------------------------|
| <b>Allocation Concealment</b>                     | Low     | Study states allocation was performed under blinded conditions.                                                                                                                                                          |
| <b>Blinding Outcome Assessors</b>                 | Low     | Study states outcome assessment using VDS scale was interpreted by experienced physician and occupational therapist blinded to group allocation.                                                                         |
| <b>Incomplete reporting outcome data</b>          | Low     | All incomplete outcome data were presented in Consort Diagram in paper. Low drop out of 3/15 patients across both experimental groups and accounted for.                                                                 |
| <b>Selective reporting outcome data</b>           | Low     | All pre-specified outcomes were reported in results of paper.                                                                                                                                                            |
| <b>Other biases</b>                               | Unclear | Within an acute rehab unit in a single centre study, it is possible that participants from both experimental groups would find out what group they were assigned to given patient proximity to each other in such units. |
| <b>Blinding of participants during treatment</b>  | Low     | This is described as double-blinded study. Participants were unaware what experimental group they were allocated to.                                                                                                     |
| <b>Blinding of personnel delivering treatment</b> | High    | As this study involved testing a swallowing therapy that involved interaction with the participant, it was not possible to blind personnel delivering the intervention.                                                  |

Suntrup 2015 <sup>[43]</sup>

| <b>Bias</b>                                      | <b>Authors' judgement</b> | <b>Support for judgement</b>                                                                                                                                                                                                                                                                     |
|--------------------------------------------------|---------------------------|--------------------------------------------------------------------------------------------------------------------------------------------------------------------------------------------------------------------------------------------------------------------------------------------------|
| <b>Random Sequence Generation</b>                | Low                       | randomly assigned 2:1 to receive either EPS or sham stimulation using computer-assisted randomization                                                                                                                                                                                            |
| <b>Allocation Concealment</b>                    | Low                       | The randomization schedule was kept remotely from the study environment. The study coordinator provided assignment to the treating physician by phone.                                                                                                                                           |
| <b>Blinding Outcome Assessors</b>                | Unclear                   | Not clearly stated in this study.                                                                                                                                                                                                                                                                |
| <b>Incomplete reporting outcome data</b>         | Low                       | All recruited patients finished the study. One patient was transferred to rehab during unblinded EPS but could be followed up. All outcome data accounted for and study flow chart as per CONSORT guidelines was included in this study accounting for all participants randomised and analysed. |
| <b>Selective reporting outcome data</b>          | Low                       | All outcomes of interest to the research team attached to this study were reported in results section. Intervention adherence and adverse events also reported.                                                                                                                                  |
| <b>Other biases</b>                              | Low                       | None identified in this study.                                                                                                                                                                                                                                                                   |
| <b>Blinding of participants during treatment</b> | Unclear                   | Blinding not explicitly stated in this study                                                                                                                                                                                                                                                     |

|                                                   |         |                                                                                                                                                                                                                                                         |
|---------------------------------------------------|---------|---------------------------------------------------------------------------------------------------------------------------------------------------------------------------------------------------------------------------------------------------------|
| <b>Blinding of personnel delivering treatment</b> | Unclear | It is unclear from text how the personnel delivering the intervention could be blinded from giving active versus sham stimulation. It is not clearly stated if different personnel were involved in delivery of sham stimulation and active stimulation |
|---------------------------------------------------|---------|---------------------------------------------------------------------------------------------------------------------------------------------------------------------------------------------------------------------------------------------------------|

Suntrup-Kreuger 2018 <sup>[44]</sup>

| <b>Bias</b>                                       | <b>Authors' judgement</b> | <b>Support for judgement</b>                                                                                                                                                                                                                                                 |
|---------------------------------------------------|---------------------------|------------------------------------------------------------------------------------------------------------------------------------------------------------------------------------------------------------------------------------------------------------------------------|
| <b>Random Sequence Generation</b>                 | Low                       | Dysphagic patients fulfilling the inclusion criteria were randomly assigned 1:1 to receive either tDCS or sham stimulation using computer-assisted randomization.                                                                                                            |
| <b>Allocation Concealment</b>                     | Unclear                   | Not clearly stated in the study.                                                                                                                                                                                                                                             |
| <b>Blinding Outcome Assessors</b>                 | Low                       | Investigators performing swallowing assessment, medical technical staff involved in MEG data acquisition, and the researchers performing nonautomated steps in anatomical and functional imaging data preprocessing and analysis were also blinded to the intervention type. |
| <b>Incomplete reporting outcome data</b>          | Low                       | Sixty patients were randomized. One dropped out because of recurrent stroke not related to the study intervention. All other patients (n 5 59) were treated as intended, completed the study, and were included in data analysis.                                            |
| <b>Selective reporting outcome data</b>           | Low                       | All prespecified primary and secondary outcomes were reported in results section.                                                                                                                                                                                            |
| <b>Other biases</b>                               | Low                       | None identified                                                                                                                                                                                                                                                              |
| <b>Blinding of participants during treatment</b>  | Low                       | Subjects were unaware of the type of treatment they received.                                                                                                                                                                                                                |
| <b>Blinding of personnel delivering treatment</b> | High                      | This was not possible as interventions delivered were different and not clearly stated that different personnel delivered intervention to the different treatment groups.                                                                                                    |

Vasant 2016 <sup>[45]</sup>

| <b>Bias</b>                       | <b>Authors' judgement</b> | <b>Support for judgement</b>                                                                                                                      |
|-----------------------------------|---------------------------|---------------------------------------------------------------------------------------------------------------------------------------------------|
| <b>Random Sequence Generation</b> | Low                       | Following consent and baseline assessment, patients were randomized through a concealed program created by our information technology department. |
| <b>Allocation Concealment</b>     | Low                       | Concealment completed via a computerised programme                                                                                                |

|                                                   |         |                                                                                                                                                                                                                                                                                                           |
|---------------------------------------------------|---------|-----------------------------------------------------------------------------------------------------------------------------------------------------------------------------------------------------------------------------------------------------------------------------------------------------------|
| <b>Blinding Outcome Assessors</b>                 | Low     | SLTs who independently assessed the outcomes (DSR/ instrumental swallowing examinations) were blinded to group allocation.                                                                                                                                                                                |
| <b>Incomplete reporting outcome data</b>          | Low     | 1 participant lost to follow up; 2 died before 3 month follow-up assessments completed (N=36)                                                                                                                                                                                                             |
| <b>Selective reporting outcome data</b>           | Low     | All outcomes reported in this study                                                                                                                                                                                                                                                                       |
| <b>Other biases</b>                               | Unclear | SH provides scientific advice via a secondment agreement with the University of Manchester to a medical device company focusing on dysphagia (Phagenesis Ltd), which manufactures the Phagenyx device. He also sits on the Phagenesis Ltd board of directors as a founder and owns shares in the company. |
| <b>Blinding of participants during treatment</b>  | Low     | Participants were blinded to group allocation - clearly stated in procedures section of study.                                                                                                                                                                                                            |
| <b>Blinding of personnel delivering treatment</b> | High    | The researcher who delivered the interventions was not blinded to the group allocation.                                                                                                                                                                                                                   |

Wu 2011 <sup>[46]</sup>

| <b>Bias</b>                                       | <b>Authors' judgement</b> | <b>Support for judgement</b>                                                          |
|---------------------------------------------------|---------------------------|---------------------------------------------------------------------------------------|
| <b>Random Sequence Generation</b>                 | Low                       | Random number table method used in this study.                                        |
| <b>Allocation Concealment</b>                     | Low                       | Doctors and patients do not know the allocation.                                      |
| <b>Blinding Outcome Assessors</b>                 | Unclear                   | Not stated in the study                                                               |
| <b>Incomplete reporting outcome data</b>          | Low                       | 207/229 completed all treatment, with 6 drop outs in total across study participants. |
| <b>Selective reporting outcome data</b>           | Low                       | All pre-specified outcomes in study were reported                                     |
| <b>Other biases</b>                               | Low                       | None identified                                                                       |
| <b>Blinding of participants during treatment</b>  | Unclear                   | Not stated in study                                                                   |
| <b>Blinding of personnel delivering treatment</b> | Unclear                   | Not stated in study                                                                   |

Xia 2011 <sup>[47]</sup>

| <b>Bias</b>                       | <b>Authors' judgement</b> | <b>Support for judgement</b>                 |
|-----------------------------------|---------------------------|----------------------------------------------|
| <b>Random Sequence Generation</b> | Unclear                   | Randomisation is not clearly stated in study |

|                                                   |         |                                                                       |
|---------------------------------------------------|---------|-----------------------------------------------------------------------|
| <b>Allocation Concealment</b>                     | Unclear | Not stated in study                                                   |
| <b>Blinding Outcome Assessors</b>                 | Low     | Outcomes were assessed blinded.                                       |
| <b>Incomplete reporting outcome data</b>          | Low     | All participants randomised were included in analysis of all outcomes |
| <b>Selective reporting outcome data</b>           | Low     | All prespecified outcomes were reported                               |
| <b>Other biases</b>                               | Unclear | Unclear from study if any additional biases                           |
| <b>Blinding of participants during treatment</b>  | Unclear | Not stated in study                                                   |
| <b>Blinding of personnel delivering treatment</b> | Unclear | Not stated in study                                                   |

Yang 2012 <sup>[47]</sup>

| <b>Bias</b>                                       | <b>Authors' judgement</b> | <b>Support for judgement</b>                                                                                                                                              |
|---------------------------------------------------|---------------------------|---------------------------------------------------------------------------------------------------------------------------------------------------------------------------|
| <b>Random Sequence Generation</b>                 | Unclear                   | Study states patients were randomly assigned to active or sham stimulation groups but it does not state method of randomisation used in this study.                       |
| <b>Allocation Concealment</b>                     | Unclear                   | No method used to conceal allocation described in this study.                                                                                                             |
| <b>Blinding Outcome Assessors</b>                 | Low                       | The study clearly states that blinding was performed during pre treatment, post treatment and 3 month follow up assessments.                                              |
| <b>Incomplete reporting outcome data</b>          | Low                       | Two participants were lost during follow-up period: one from sham and one from active tDCS groups. 14 patients were assessed at post treatment periods.                   |
| <b>Selective reporting outcome data</b>           | Low                       | All prespecified outcomes were reported in this study                                                                                                                     |
| <b>Other biases</b>                               | Low                       | None identified. Study funded by local hospital research fund.                                                                                                            |
| <b>Blinding of participants during treatment</b>  | Low                       | As the treatments were identical in this study and all devices were the same, with only difference being active or sham stimulation, it is assumed blinding was possible. |
| <b>Blinding of personnel delivering treatment</b> | Unclear                   | However it does not clearly state in study that investigators delivering stimulation were blinded to group allocation.                                                    |



## Appendix J: Meta analyses of secondary outcomes

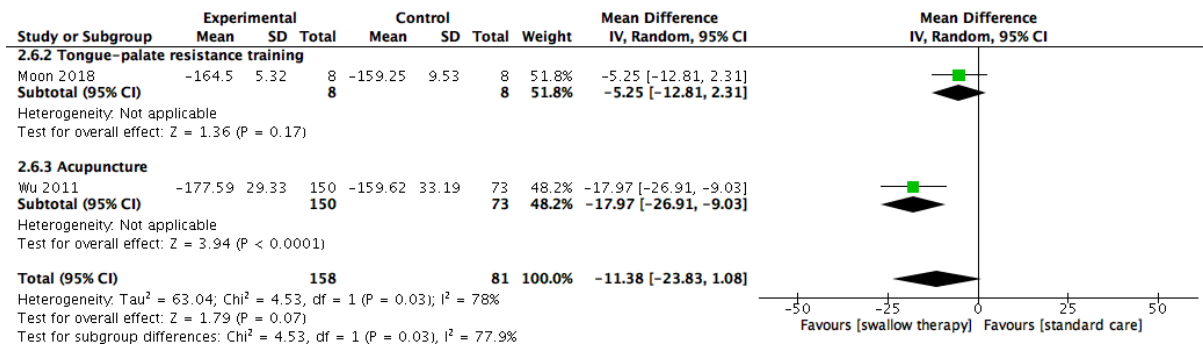

Fig. 1: Swallowing therapy versus standard care: quality of life.

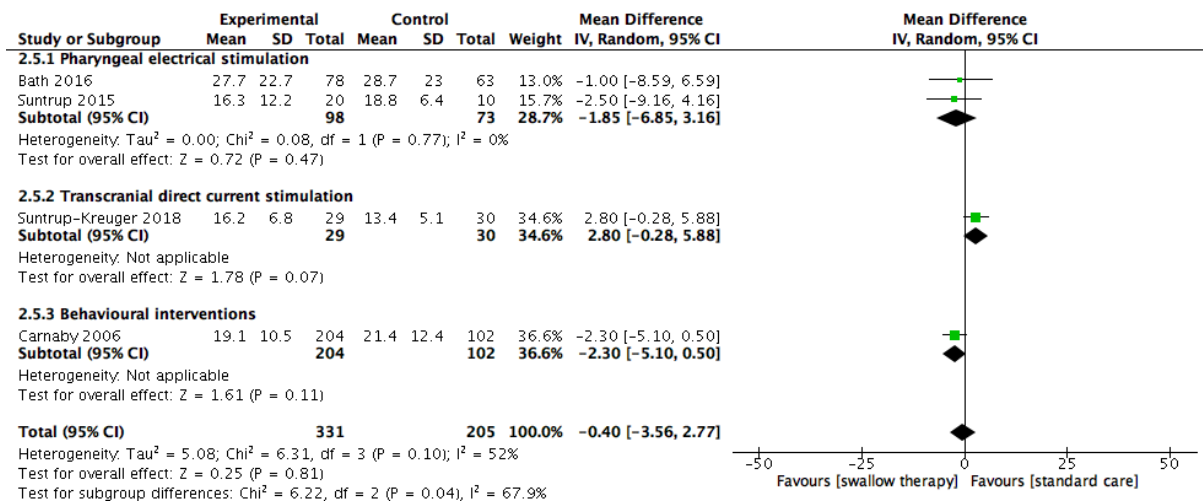

Fig. 2: Swallowing therapy versus standard care: length of stay.

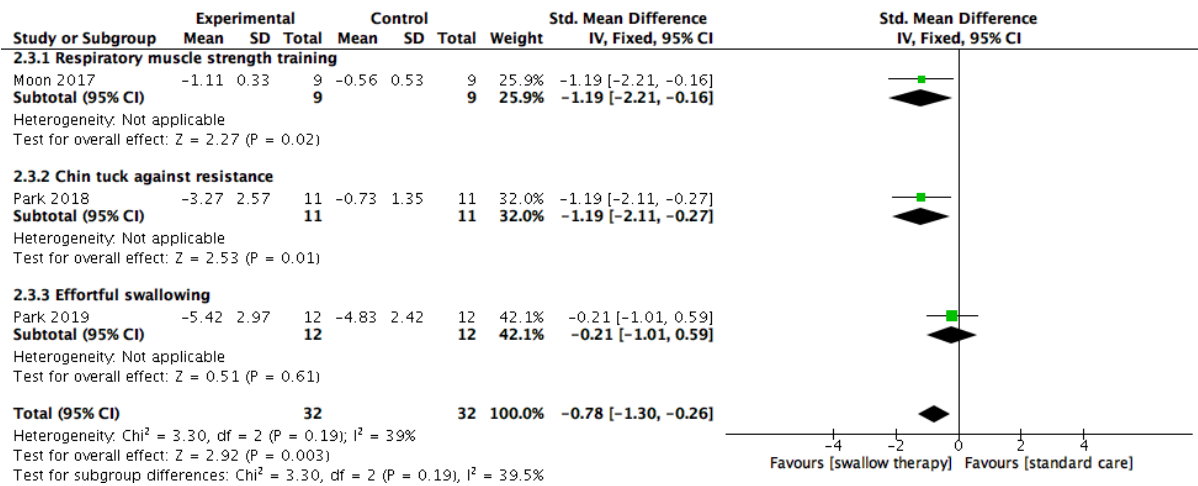

Fig. 3: Swallowing therapy versus standard care: change in pharyngeal residue severity

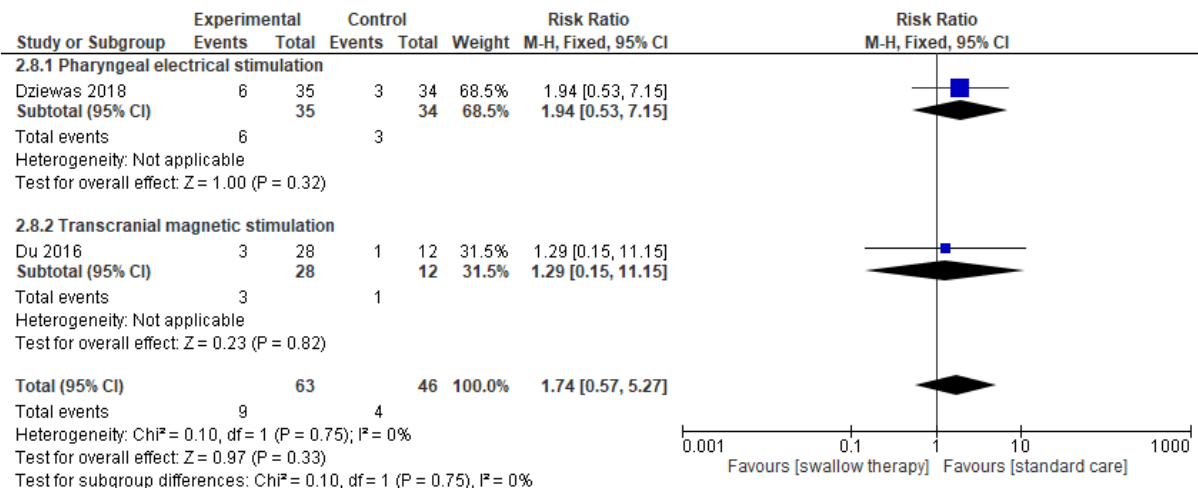

Fig. 4: Swallowing therapy versus standard care: Intervention-related adverse events
